# Supplementary material
Source: PubMed Central journal article supplement (PMC3657719)
Supplement: NIHMS49281-supplement-01.pdf [file NIHMS49281-supplement-01.pdf]

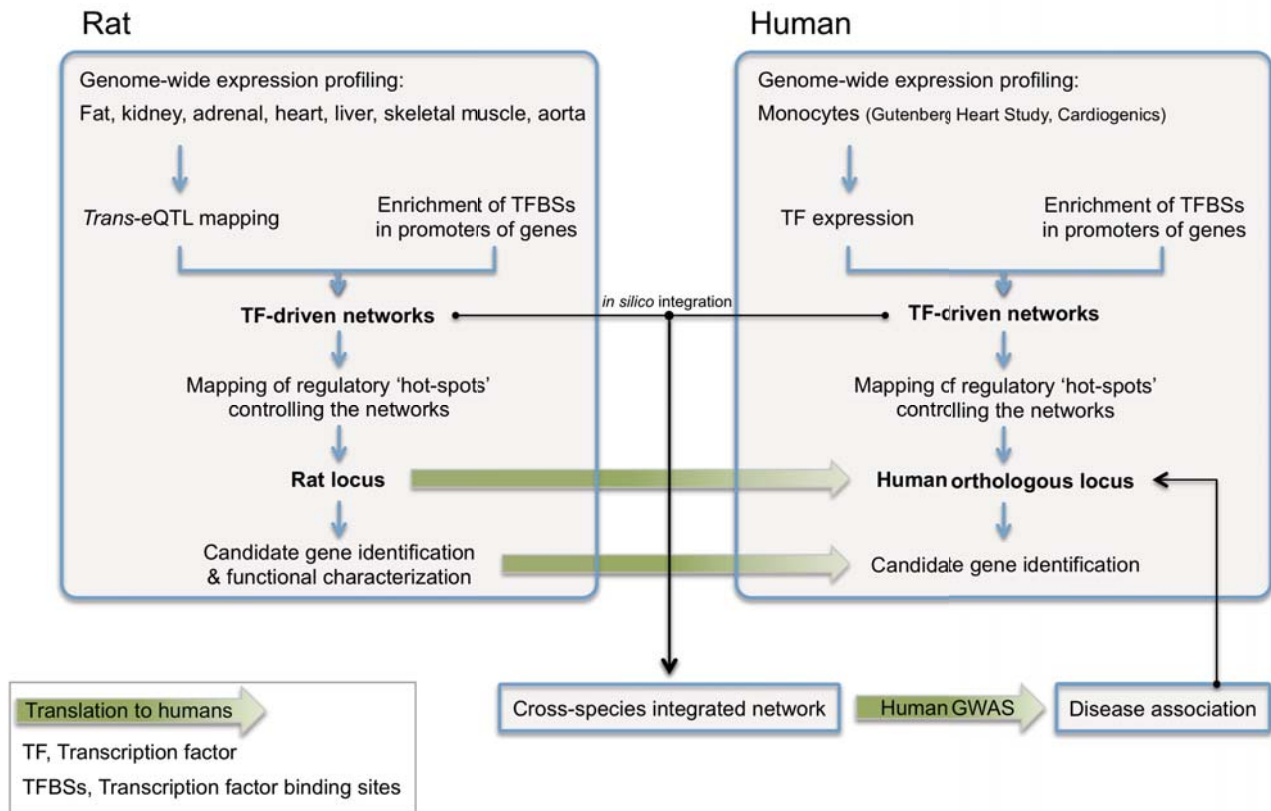

**Supplementary Figure 1:** Schematic overview of the study design and data analysis pipeline.

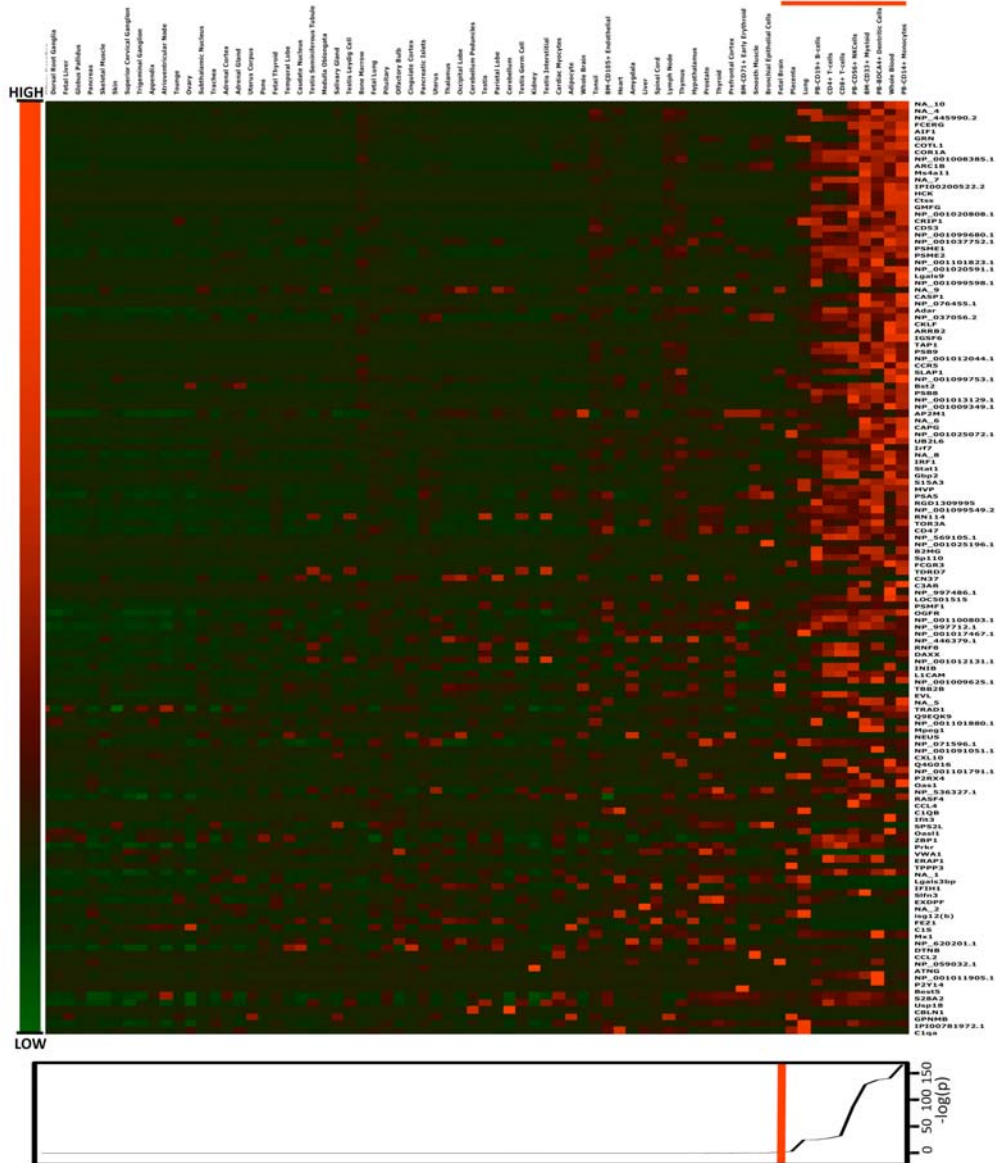

**Supplementary Figure 2:** Heat map representing the gene expression of human (a) and mouse (b) (see next page) orthologues of the iDIN across cell and tissue types and the distribution of combined *P*-values illustrated at the bottom. Genes are given to the right of the heat maps and cell and tissues, ordered by combined *P*-values, are given at the top of the graph. Red indicates an increase in gene expression whereas green indicates a decrease in gene expression. The red lines both above the cell types indicates the cell and tissue types where there is significant enrichment of the iDIN gene expression. The red bar on the distribution of combined *P*-values indicates the Bonferroni threshold used to correct for multiple testing.

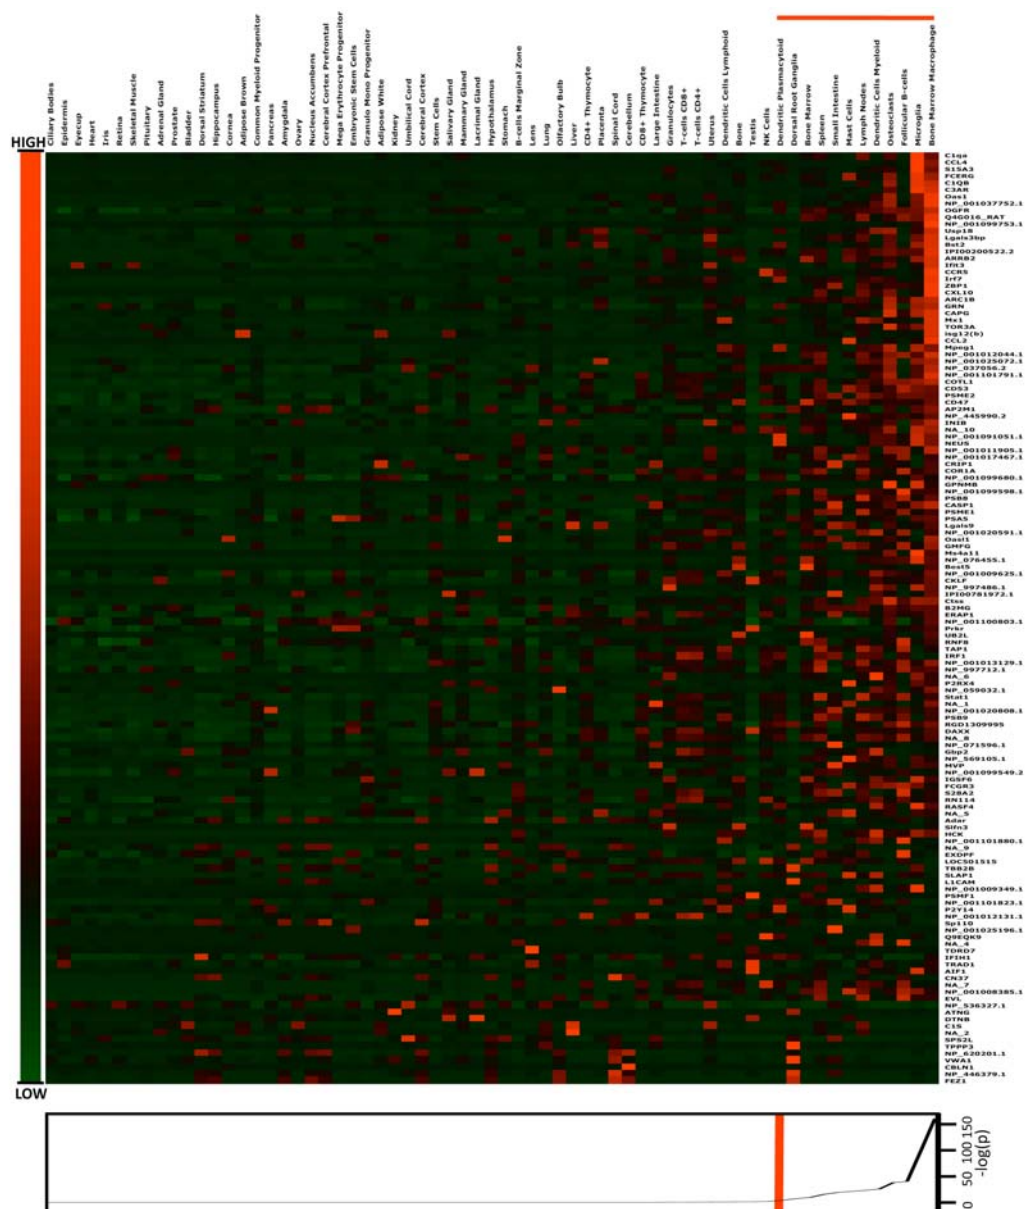

Supplementary Figure 2: b) Heat map representing the gene expression mouse orthologues of the iDIN across cell and tissue types.

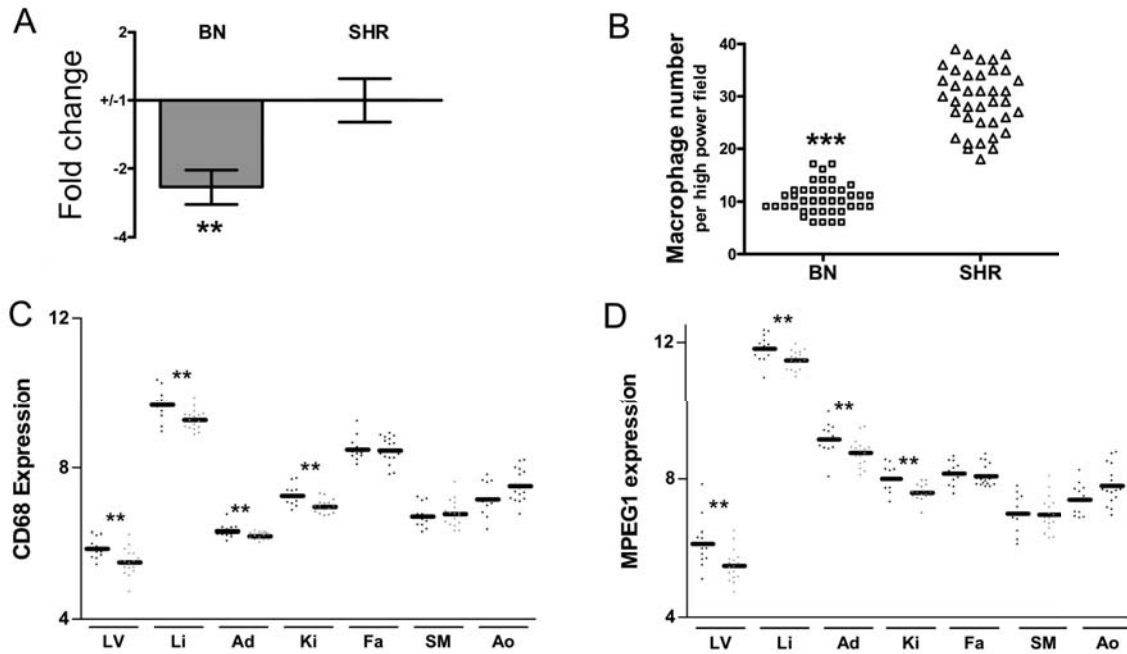

**Supplementary Figure 3:** Genotype dependent effects on macrophage numbers in SHR and BN tissues. **(a)** Quantification of RT-PCR analysis of macrophage-specific *Cd68* expression in BN and SHR heart (\*\*,  $P = 0.01$ ). **(b)** Quantification of the number of  $Cd68^{+ve}$  macrophages in BN and SHR heart sections in 20 high power fields (\*\*\*,  $P = 2 \times 10^{-22}$ ) (see Supplementary Information). **(c)** and **(d)** Microarray-derived *Cd68* **(c)** and Macrophage-expressed gene 1 protein (*Mpeg1*, **d**) expression levels ( $\text{Log}_2$ ) across all tissues (left ventricle (LV), liver (Li), adrenal (Ad), kidney (Ki), fat (Fa), skeletal muscle (SM) and aorta (Ao) in the BXH/HXB RI strain panel stratified by SHR (black dots) or BN (grey dots) genotype at SNP (J666808) on chromosome 15, mean expression levels are depicted as solid bars (\*\*,  $P < 0.01$ ).

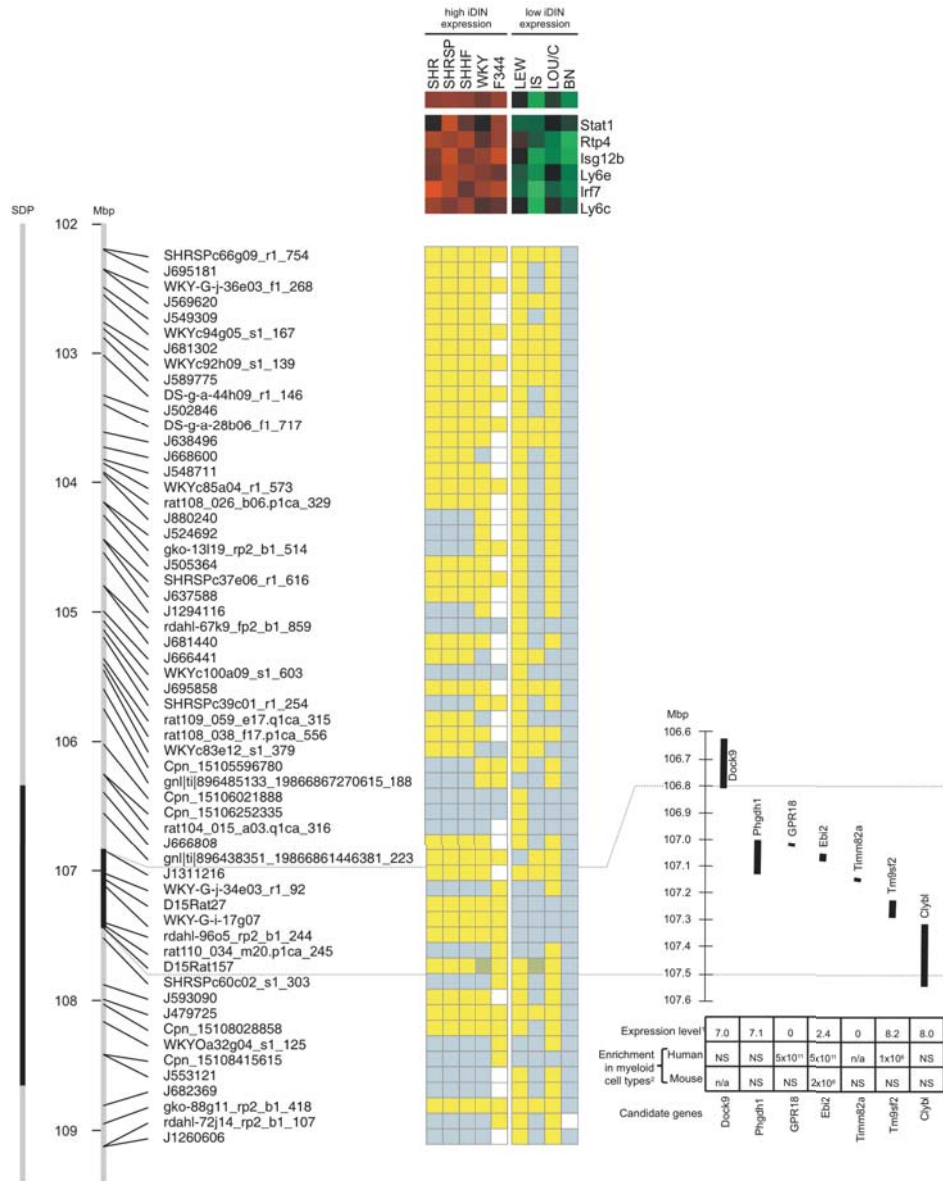

**Supplementary Figure 4:** Fine mapping of the candidate region controlling iDIN in the rat. Sequence map of the chromosome 15 locus associated with the iDIN expression. The black bar denotes the mapping of the locus to a specific strain distribution pattern in the recombinant inbred strains. Low and high iDIN expression denote additional rat strains with low and high expression of key genes of the iDIN (quantitative RT-PCR for *Stat1*, *Rtp4*, *Isg12b*, *Ly6e*, *Irf7*, *Ly6c*). Colored boxes indicate classification of alleles: blue = BN or identical to BN; yellow = SHR or identical to SHR; green = WKY or identical to WKY, and white for missing data. The dotted lines correspond to the markers delimiting the 0.7 Mb region of haplotype similarity within the locus that controls iDIN (for delimitation of the haplotype border we used, as a conservative estimate, the second consecutive marker outside the shared region, respectively). Right panel, genomic locations of the genes encoded within the shared segment that is indicative for low and high expression of iDIN genes. Bottom panel, RNA-Seq-derived gene expression in the heart (log<sub>2</sub> scale) and the significance of enrichment in myeloid-derived cell types is reported for each gene in the table.

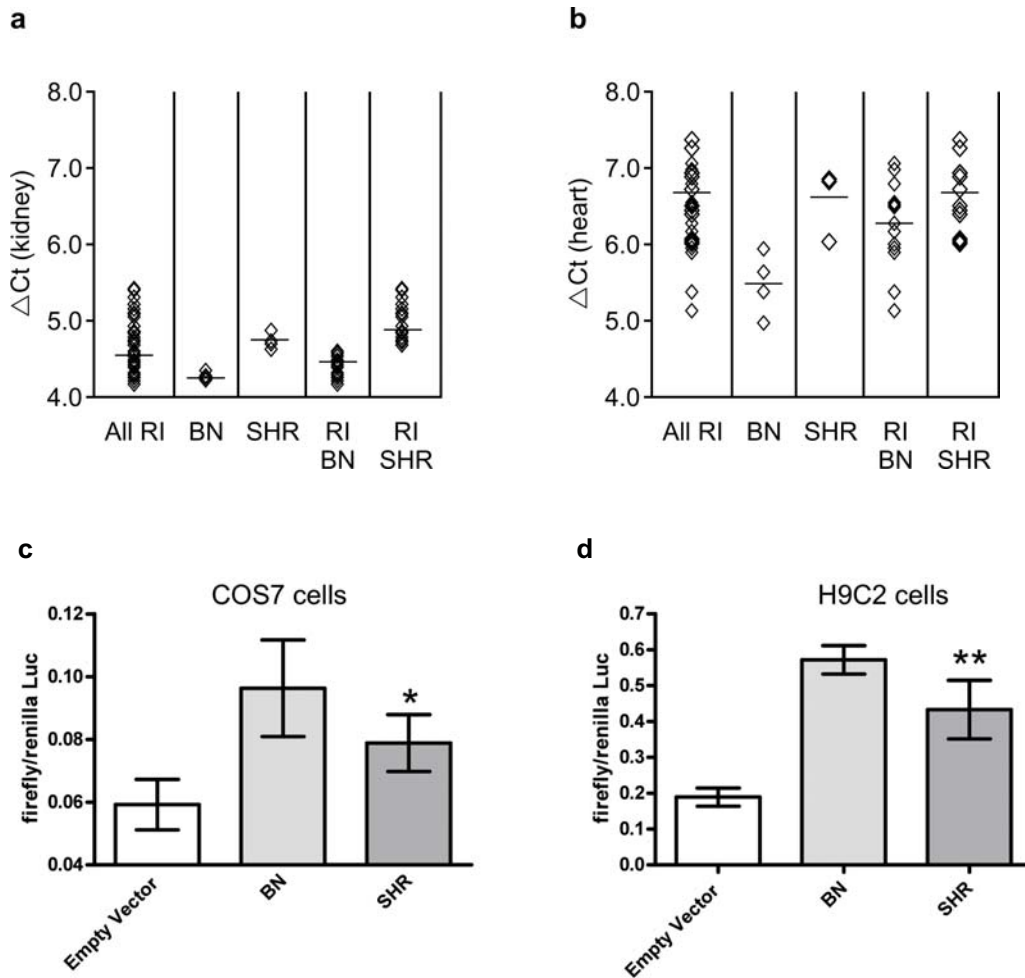

**Supplementary Figure 5.** (a, b) QPCR analysis of *Ebi2* expression in kidney and heart of parental and RI strains. Expression of *Ebi2* was measured in the parental strains SHR and BN and 29 RI strains using qPCR. *Ebi2* was differentially expressed in the parental strains and shows allele dependent expression in the RI strains with respect to the SNP J666808 in both tissues. (c, d) Effect of the 5'UTR *Ebi2* SNP between BN and SHR on protein expression. To determine the functional effects of this on protein expression the 5'UTR of BN or SHR were cloned upstream of Firefly luciferase (Luc) in the pGL3 vector. Effects on Luc protein expression were examined in two cell lines, a rat cell line (H9C2) and a human cell line (COS7) and normalised for transfection efficiency using Renilla Luc. There was a significant decrease in Luc translation by the SHR allele as compared to the BN allele. Data are shown as means and SDs. \*,  $P = 0.023$ ; \*\*,  $P = 0.009$ .

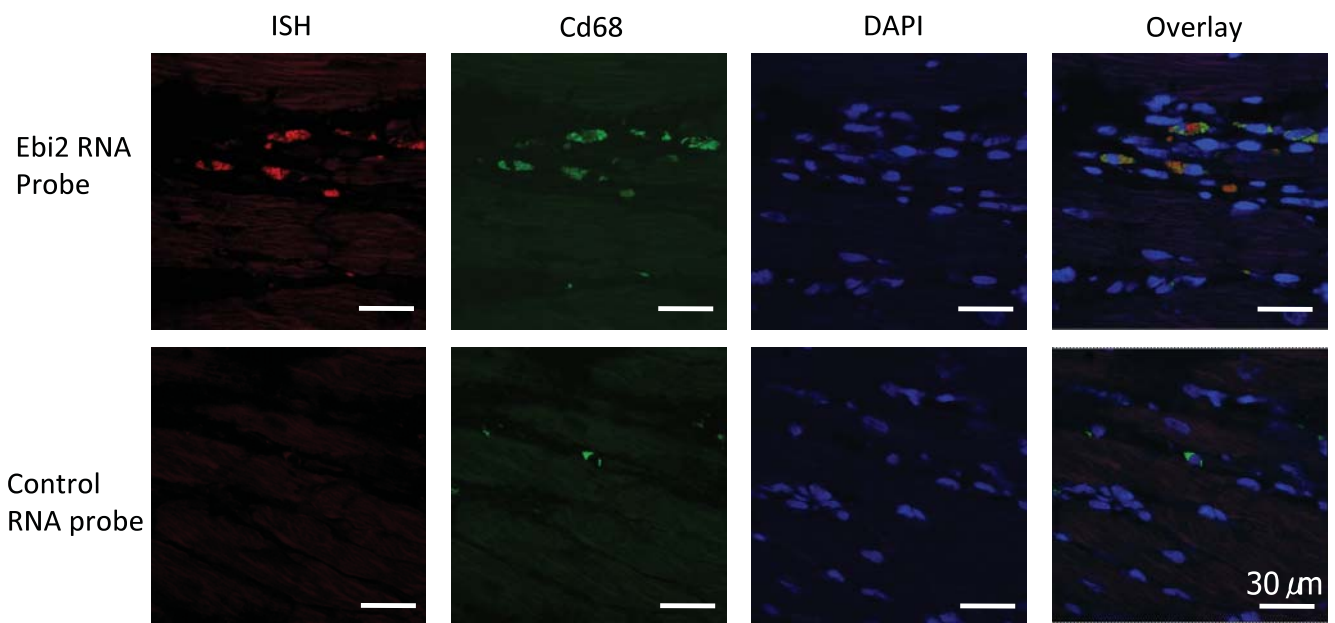

**Supplementary Figure 6:** Localisation of *Ebi2* gene expression to Cd68<sup>+</sup> macrophages in the rat. Sections from SHR heart were probed with locked nucleic acid oligonucleotide against *Ebi2* RNA (top row) or control oligonucleotide (bottom row) by in situ hybridization. Bound oligonucleotides were detected with anti-DIG antibodies (first column, red). Sections were counterstained with anti-Cd68 (second column, green) and nuclei were visualized with DAPI (third column, blue). The combined images are represented as an overlay (see Supplementary Information).

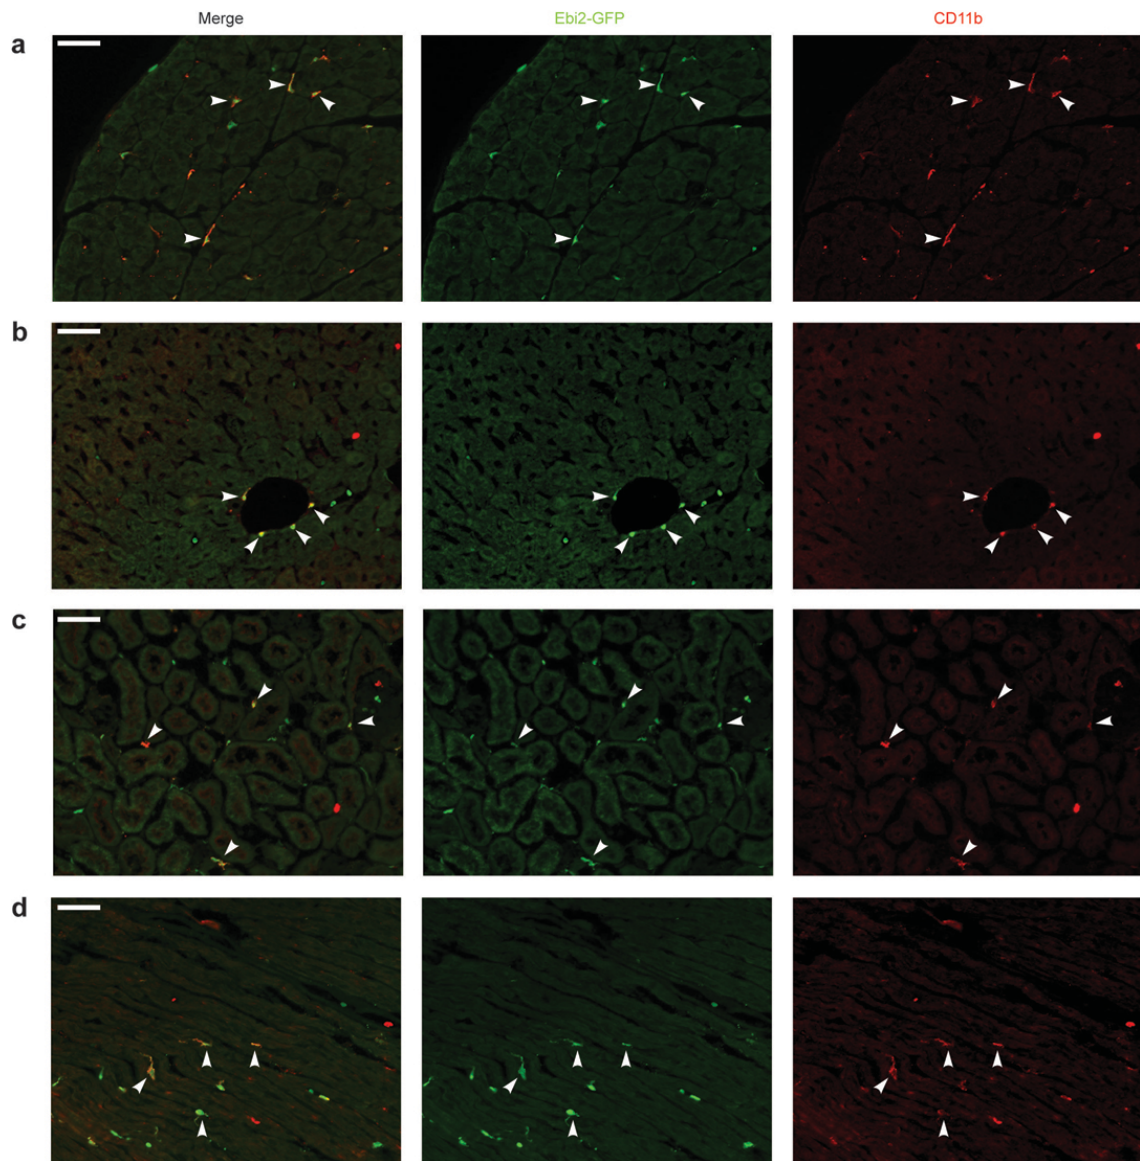

**Supplementary Figure 7:** Ebi2-expressing CD11b<sup>+</sup> myeloid cells in adult Ebi2<sup>GFP/+</sup> mice across multiple tissues. Fluorescent microscopy of (a) pancreas, (b) liver, (c) kidney, and (d) heart tissue from Ebi2<sup>GFP/+</sup> mice that were stained with antibodies to GFP (green) and CD11b (red). White arrowheads highlight GFP and CD11b double-positive cells. Scale bar = 50 $\mu$ m.



**a**

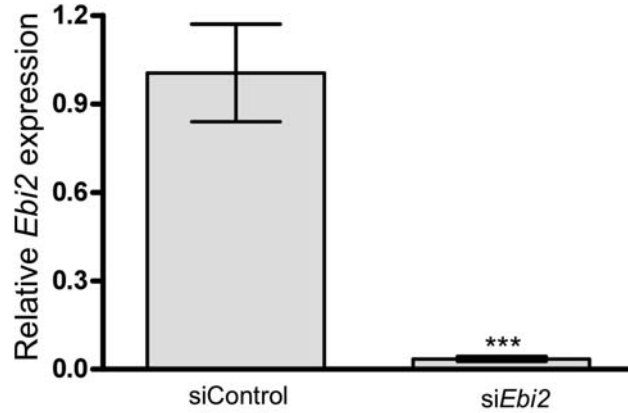

**b**

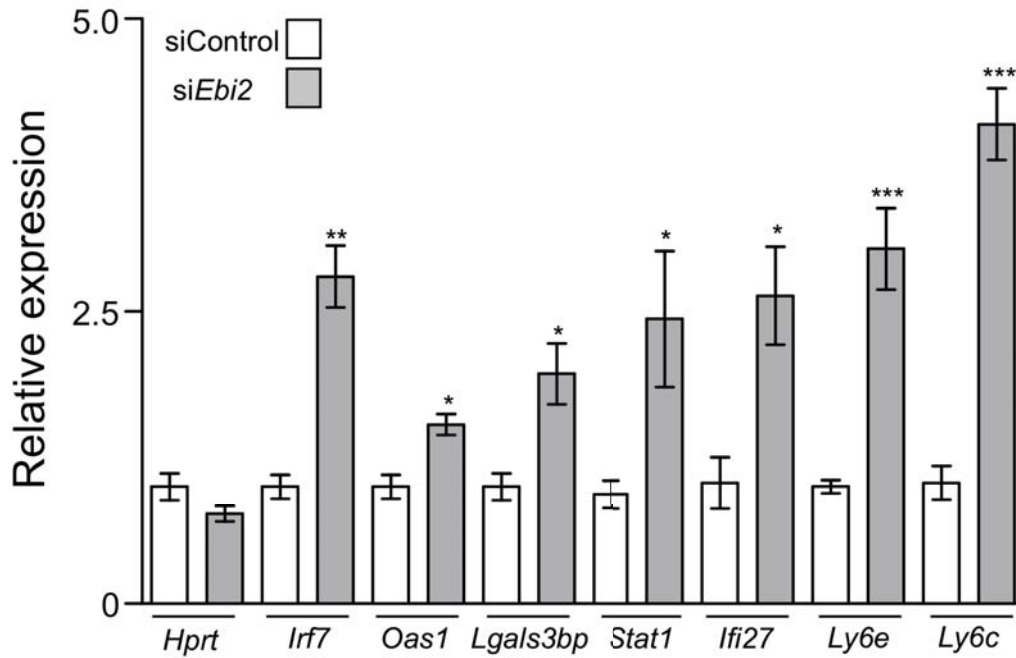

**Supplementary Figure 8:** Effect of siRNA-mediated knockdown of *Ebi2* on expression of *Irf7* and iDIN genes in rat bone marrow-derived macrophages. **a**, as compared to control siRNA (siControl), siRNA against *Ebi2* (siEbi2) significantly downregulated (97% inhibition) *Ebi2* mRNA expression. **b**, While siEbi2 had no effect on control gene expression (*Hprt*) there was a significantly increase in expression of *Irf7* and of iDIN genes *Oas1*, *Lgals3bp*, *Stat1*, *Irf27*, *Ly6e* and *Ly6c*. Data, normalized to  $\beta$ -actin levels ( $\Delta\Delta Ct$ ; see Supplementary Information), are shown as means relative to control  $\pm$  SEMs. \*,  $P < 0.05$ ; \*\*  $P < 0.01$ ; \*\*\*  $P < 0.005$ . The experiment was repeated with similar results.

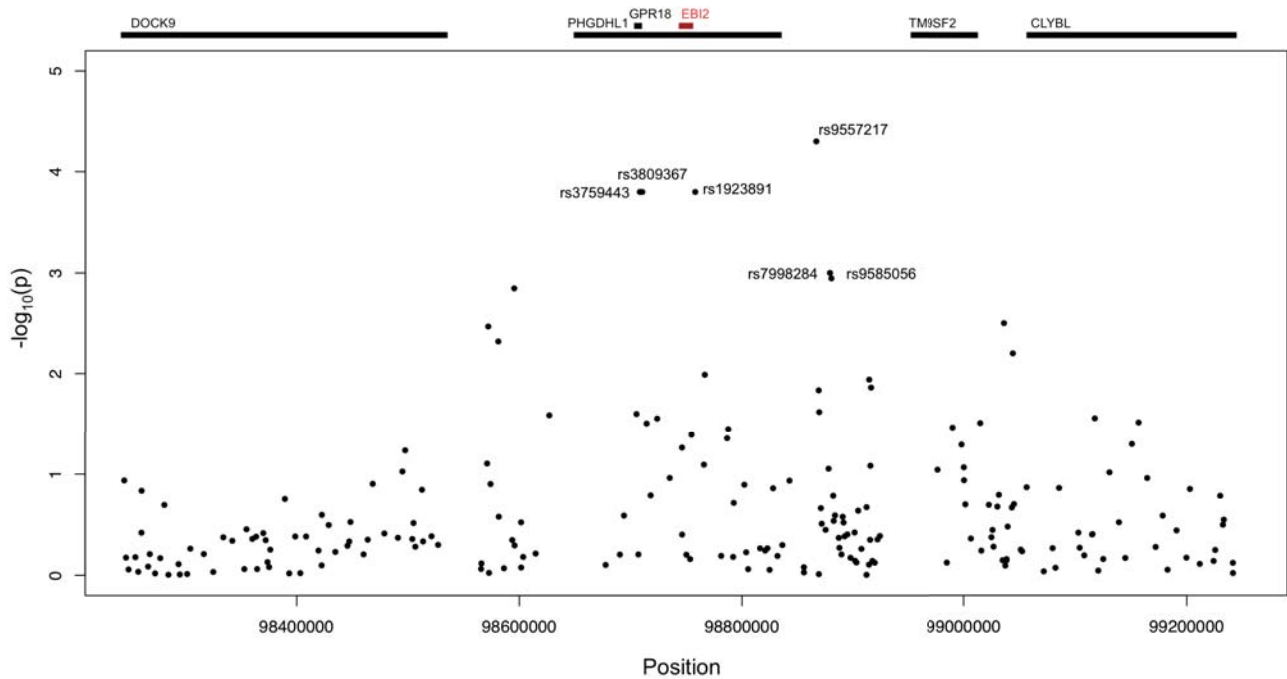

**Supplementary Figure 9:** Results of MANOVA analysis for *IRF7* and the *IRF7*-target genes in the Cardiogenics cohort. For all SNPs within the chromosome 13q32 locus, we report the nominal  $-\log_{10} P$ -value (y-axes) from the MANOVA test. Significant association (FDR < 5%) between SNPs and network genes that are also confirmed by the non-parametric robust MANOVA (n=6) are indicated in the graph (Supplementary Information). Similar analyses in the Gutenberg Heart Study (GHS) cohort did not detect an association of *IRF7* or *IRF7*-target genes with SNPs at this locus (data not shown).

## Supplementary information

### Rat expression data

Expression data for eQTL analysis has been generated for seven tissues: adrenal, aorta, fat, kidney, left ventricle, liver and skeletal muscle using Affymetrix RAE230a and RAE230\_2.0 arrays. For each of the SHR and BN parental strains and the 29 RI strains 4-5 biological replicates were profiled. Altogether 907 expression arrays were analyzed. Data was normalized using the RMA algorithm<sup>1</sup> with quantile normalization and log<sub>2</sub> transformation together for each set of microarrays profiled in each tissue. For each transcript and within the replicates of one strain, we removed outliers from the expression data using the Nalimov outlier test, as previously described<sup>2,3</sup>.

### Expression QTL mapping in the rat

We have used the genetic map of the BXH/HXB RI strains<sup>2</sup> generated in a previous large scale effort by the STAR consortium<sup>4</sup>. This map was derived from around 13,000 polymorphic SNP markers leading to ~1,400 unique strain distribution patterns (SDP) for the genetic analysis. The average strain expression values were used for mapping using QTL reaper software<sup>5</sup>. This software implements a marker regression with permutation to calculate genome-wide corrected  $P$ -values ( $P_{GW}$ ) for each transcript. Here we used one million permutations to assess genome-wide significance of the eQTLs.

### Genome-wide analysis of TF – target eQTLs

We have analyzed eQTL data in conjunction with transcription factor binding site (TFBS) predictions following the hypothesis that genetic changes of gene expression of TFs will impact on the expression of their direct targets. The first prerequisite is to find TFs linked to a genetic variation, and second, to score the differential expression of the TF together with its predicted targets. From the eQTL data we have identified a total of 147 transcription factors with an eQTL in at least one tissue and a known TFBS with a model in TRANSFAC<sup>6</sup> at a genome-wide corrected  $P < 0.1$  using QTL-reaper<sup>4</sup> (see eQTL mapping). In order to quantify the effect of this dysregulation of the TF on its targets, we

searched for *trans*-eQTLs co-occurring at the peak markers of the TF eQTLs. For each TF, we retrieved a list of 1,000 top-ranked transcripts according to their Likelihood Ratio Statistics (LRS) score at the TF eQTL peak marker and subjected this ranked list to a TFBS enrichment analysis using PASTAA<sup>7</sup>. PASTAA compares this LRS-determined ranking to a ranking based on predicted TF binding affinities to the 200 bp proximal promoter determined by a biophysical model<sup>7</sup>. Promoter sequences were extracted from ENSEMBL and TSS annotation provided by P. Carnici (unpublished). The comparison is performed using an iterated hypergeometric test for the overlap of the 'top ranked' genes when varying the thresholds on both lists. This procedure circumvents the recurring problem of setting more or less arbitrary thresholds on eQTL *P*-values or TFBS predictions. In addition to quantifying the overall enrichment this procedure also determines the thresholds used to define eQTLs and TF targets and moreover the set of genes satisfying both criteria which is used to define the differentially expressed targets of the TF. The statistical significance of this procedure is assessed using a null distribution generated from  $1 \times 10^6$  permuted gene lists.

### **Quantitative chromatin immunoprecipitation (ChIP)**

For quantitative ChIP, chromatin was prepared from 100 mg tissue (left ventricle of the heart and liver) using EpiQuik Tissue ChIP Kit (Epigentek, NY, USA) according to the manufacturer's instructions and then fragmented to a size range of 300-700 bases by sonication. Chromatin immunoprecipitation was performed essentially as described previously<sup>8</sup>. Rabbit antibodies against Irf7 (Invitrogen, Germany) or pre-immune IgG (Santa Cruz Biotechnology, CA, USA) were bound to protein A-coupled Dynabeads (Invitrogen, Germany) prior to incubation with chromatin. Each immunoprecipitated DNA sample was subjected to Taqman quantitative PCR analysis. Primer and probe sequences are listed in Supplementary Table 10.

### **Co-expression network analysis in the rat**

In order to gain insight into potential upstream regulators of the *Irf7* network we have used a co-expression network derived from gene expression profiles across 7 tissues and 30 strains. For this analysis we removed tissue mean expression values for each

gene because we were only interested in the genetic variability across strains. Assuming independence of expression values between tissues within the same strain we have used all 203 samples for pairs of transcripts where both transcripts were measured in all tissues. For pairs of transcripts where at least one transcript was present only on the Affymetrix array RAE230 2.0 microarrays we used the available 116 samples to compute pair-wise Pearson correlation coefficients. The network is formally defined by the tuple  $(V, E)$  with  $V$  being the set of nodes or vertices and  $E$  the set of edges. Here  $V$  corresponds to the set of all transcripts profiled on the Affymetrix RAE230a gene array. Since we are interested in the network neighborhood of the predicted *Irf7* targets we define the set  $I$  (subset of  $V$ ) of predicted targets. The set of Edges  $E$  is defined as all tuples of transcripts where one is a predicted target (element of  $I$ ) and the other is from the rest of nodes ( $V \setminus I$ ) with significant Pearson correlation coefficients. We used a false discovery rate (FDR) approach to determine significance of Pearson correlation coefficients<sup>9</sup>. This approach estimates the FDR using a mixture model on the correlation coefficients with an empirical parametric null-distribution and a non-parametric alternative distribution. For the estimation of the null distribution we have used 99% of the data. We considered the correlation significant with  $FDR < 0.001$ . Finally, we have removed unconnected nodes leading to the final set of nodes  $V'$  of the expanded *Irf7* network. For the visualization we then re-estimated the FDR using the same approach described above using the complete correlation matrix for the set  $V'$ . All genes in rat *Irf7*-driven inflammatory network (iDIN) are reported in Supplementary Table 2.

### **Gutenberg Heart Study sample and expression analysis**

The Gutenberg Heart Study (GHS) included 1,490 participants successively enrolled into a community-based, prospective, observational single-center study in the Rhein-Main region in western mid-Germany. All subjects gave written informed consent. Ethical approval was given by the local ethics committee and by the local and federal data safety commissioners. Separation of monocytes was conducted within 60 min after blood collection. 8 mL blood was collected using the Vacutainer CPT Cell Preparation Tube System (BD, Heidelberg, Germany) and 400  $\mu$ L RosetteSep Monocyte Enrichment Cocktail (StemCell Technologies, Vancouver, Canada) was added immediately after

blood collection. This cocktail contains antibodies directed against cell surface antigens on human hematopoietic cells (CD2, CD3, CD8, CD19, CD56, CD66b) and glycophorin A on red blood cells. Total RNA was extracted the same day using Trizol extraction and purification by silica-based columns and 200 ng of total RNA was reverse transcribed, amplified and biotinylated using the Illumina TotalPrep-96 RNA Amplification Kit (Ambion/Applied Biosystems, Darmstadt, Germany). cDNA and cRNA purification were performed automatically using the MagMax Express96 magnetic particle processor (Applied Biosystems, Darmstadt, Germany) and cRNA was controlled on an Agilent Bioanalyzer 2100 (Agilent Technologies, Boeblingen, Germany). Gene expression profiling was performed using the Illumina HT-12 v3 BeadChip. BeadChips were scanned using the Illumina Bead Array Reader and pre-processing of data was performed with Beadstudio. Out of the 48,803 probes present on the HT-12 BeadChips, 27,029 were annotated in Ensembl that matched to 17,156 distinct Ensembl genes. After filtering transcripts undetected in monocytes and those exhibiting low intra-individual variation, 10,742 transcripts were analyzed. Genotyping was performed using the Affymetrix Genome-Wide Human SNP Array 6.0 and the Genome-Wide Human SNP *Nspl/Styl* 5.0 Assay kit. Genotypes were called using the Affymetrix Birdseed-V2 calling algorithm and quality control was performed using GenABEL (<http://mga.bionet.nsc.ru/nlru/GenABEL/>).

### **TF – target analysis in humans in the Gutenberg Heart Study**

In the human monocyte expression data, we were interested in the TF – target relationships without a special focus on the genetic regulation. Therefore we ranked all potential TF targets of *Irf7* according to their co-expression with the TF, as measured by the absolute Pearson correlation coefficient. Analogously to the rat TFBS enrichment analysis we obtained sequences 200 bp upstream of the transcription start site (TSS) as annotated in the ENSEMBL database and ranked them according to predicted TF affinities. Subsequently we quantified the enrichment of predicted TFBS in the top 1,000 co-expressed genes using PASTAA<sup>7</sup>. Subsequent network expansion was performed using the same procedure as in the rat. All genes within human iDIN are reported in Supplementary Table 5.

## Overlap between human and rat iDIN

In order to compare the genes in the rat and human iDIN we used ENSEMBL to derive orthologous genes between rat and human. Of all genes represented on the rat and human expression arrays we were able to identify a common set of 9,909 human genes that had a rat orthologue and were represented on both expression arrays. We defined this as the “orthologue expression set”. The human iDIN in the GHS contained 495 Ensembl genes (Supplementary Table 5) of the orthologue expression set. Out of the Ensembl 305 rat iDIN genes (Supplementary Table 2), 252 Ensembl genes were contained in the orthologue expression set. The overlap between the two sets was 51 Ensembl genes ( $P = 9.1 \times 10^{-20}$ ), which we report in the table below.

### Ensembl genes that were in common between the rat and human iDIN

| Ensembl ID      | Gene Symbol     | Gene Name                                                            | Chr* | Gene Start-End (Mbp)  |
|-----------------|-----------------|----------------------------------------------------------------------|------|-----------------------|
| ENSG00000187608 | <i>ISG15</i>    | ISG15 ubiquitin-like modifier                                        | 1    | 0.948803-0.94992      |
| ENSG00000137965 | <i>IFI44</i>    | interferon-induced protein 44                                        | 1    | 79.115481-79.129763   |
| ENSG00000162645 | <i>GBP2</i>     | guanylate binding protein 2, interferon-inducible                    | 1    | 89.571815-89.616139   |
| ENSG00000162654 | <i>GBP4</i>     | guanylate binding protein 4                                          | 1    | 89.646831-89.664615   |
| ENSG00000143119 | <i>CD53</i>     | CD53 molecule                                                        | 1    | 111.415722-111.442558 |
| ENSG00000155363 | <i>MOV10</i>    | Mov10, Moloney leukemia virus 10, homolog (mouse)                    | 1    | 113.215763-113.243368 |
| ENSG00000160710 | <i>ADAR</i>     | adenosine deaminase, RNA-specific                                    | 1    | 154.554537-154.600475 |
| ENSG00000163565 | <i>IFI16</i>    | interferon, gamma-inducible protein 16                               | 1    | 158.969758-159.024945 |
| ENSG00000186517 | <i>ARHGAP30</i> | Rho GTPase activating protein 30                                     | 1    | 161.016732-161.03976  |
| ENSG00000158869 | <i>FCER1G</i>   | Fc fragment of IgE, high affinity I, receptor for; gamma polypeptide | 1    | 161.185024-161.190489 |
| ENSG00000186283 | <i>TOR3A</i>    | torsin family 3, member A                                            | 1    | 179.050512-179.067158 |
| ENSG00000162772 | <i>ATF3</i>     | activating transcription factor 3                                    | 1    | 212.738676-212.794119 |
| ENSG00000134326 | <i>CMPK2</i>    | cytidine monophosphate (UMP-CMP) kinase 2, mitochondrial             | 2    | 6.980701-7.006766     |
| ENSG00000134321 | <i>RSAD2</i>    | radical S-adenosyl methionine domain containing 2                    | 2    | 7.005937-7.03837      |
| ENSG00000115415 | <i>STAT1</i>    | signal transducer and activator of transcription 1                   | 2    | 191.829084-191.885686 |
| ENSG00000196141 | <i>SPATS2L</i>  | spermatogenesis associated, serine-rich 2-like                       | 2    | 201.170604-201.343253 |
| ENSG00000135899 | <i>SP110</i>    | SP110 nuclear body protein                                           | 2    | 231.032009-231.090444 |
| ENSG00000079263 | <i>SP140</i>    | SP140 nuclear body protein                                           | 2    | 231.090445-231.265029 |
| ENSG00000138496 | <i>PARP9</i>    | poly (ADP-ribose) polymerase family, member 9                        | 3    | 122.246806-122.283424 |

|                 |                   |                                                                       |    |                       |
|-----------------|-------------------|-----------------------------------------------------------------------|----|-----------------------|
| ENSG00000136514 | <i>RTP4</i>       | receptor (chemosensory) transporter protein 4                         | 3  | 187.08612-187.089864  |
| ENSG00000169245 | <i>CXCL10</i>     | chemokine (C-X-C motif) ligand 10                                     | 4  | 76.942273-76.94465    |
| ENSG00000145287 | <i>PLAC8</i>      | Placenta-specific 8                                                   | 4  | 84.011201-84.035911   |
| ENSG00000138642 | <i>HERC6</i>      | hect domain and RLD 6                                                 | 4  | 89.299891-89.364248   |
| ENSG00000137628 | <i>DDX60</i>      | DEAD (Asp-Glu-Ala-Asp) box polypeptide 60                             | 4  | 169.137443-169.239958 |
| ENSG00000043462 | <i>LCP2</i>       | lymphocyte cytosolic protein 2                                        | 5  | 169.675089-169.724822 |
| ENSG00000160932 | <i>LY6E</i>       | lymphocyte antigen 6 complex, locus E                                 | 8  | 144.099902-144.103825 |
| ENSG00000178685 | <i>PARP10</i>     | poly (ADP-ribose) polymerase family, member 10                        | 8  | 145.051321-145.060635 |
| ENSG00000119922 | <i>IFIT2</i>      | interferon-induced protein with tetratricopeptide repeats 2           | 10 | 91.061712-91.069033   |
| ENSG00000119917 | <i>IFIT3</i>      | interferon-induced protein with tetratricopeptide repeats 3           | 10 | 91.087651-91.100728   |
| ENSG00000185507 | <i>IRF7</i>       | interferon regulatory factor 7                                        | 11 | 0.612555-0.615999     |
| ENSG00000132256 | <i>TRIM5</i>      | tripartite motif-containing 5                                         | 11 | 5.684787-5.959849     |
| ENSG00000156587 | <i>UBE2L6</i>     | ubiquitin-conjugating enzyme E2L 6                                    | 11 | 57.319129-57.335453   |
| ENSG00000149131 | <i>SERPING1</i>   | serpin peptidase inhibitor, clade G (C1 inhibitor), member 1          | 11 | 57.36486-57.382326    |
| ENSG00000110077 | <i>MS4A6A</i>     | membrane-spanning 4-domains, subfamily A, member 6A                   | 11 | 59.939081-59.950674   |
| ENSG00000168062 | <i>BATF2</i>      | basic leucine zipper transcription factor, ATF-like 2                 | 11 | 64.755416-64.764517   |
| ENSG00000123338 | <i>NCKAP1L</i>    | NCK-associated protein 1-like                                         | 12 | 54.891495-54.936898   |
| ENSG00000135148 | <i>TRAFD1</i>     | TRAF-type zinc finger domain containing 1                             | 12 | 112.563349-112.591407 |
| ENSG00000089127 | <i>OAS1</i>       | 2',5'-oligoadenylate synthetase 1                                     | 12 | 113.344739-113.369794 |
| ENSG00000135114 | <i>OASL</i>       | 2'-5'-oligoadenylate synthetase-like                                  | 12 | 121.458121-121.477045 |
| ENSG00000100911 | <i>PSME2</i>      | proteasome (prosome, macropain) activator subunit 2                   | 14 | 24.612571-24.61643    |
| ENSG00000165949 | <i>IFI27</i>      | interferon, alpha-inducible protein 27                                | 14 | 94.577079-94.583033   |
| ENSG00000140105 | <i>WARS</i>       | tryptophanyl-tRNA synthetase                                          | 14 | 100.800125-100.84268  |
| ENSG00000172183 | <i>ISG20</i>      | interferon stimulated exonuclease gene 20kDa                          | 15 | 89.181974-89.199714   |
| ENSG00000168961 | <i>LGALS9</i>     | lectin, galactoside-binding, soluble, 9                               | 17 | 25.956824-25.976586   |
| ENSG00000108691 | <i>CCL2</i>       | chemokine (C-C motif) ligand 2                                        | 17 | 32.582313-32.584222   |
| ENSG00000108771 | <i>DHX58</i>      | DEXH (Asp-Glu-X-His) box polypeptide 58                               | 17 | 40.253422-40.264751   |
| ENSG00000068079 | <i>IFI35</i>      | interferon-induced protein 35                                         | 17 | 41.158769-41.166475   |
| ENSG00000108679 | <i>LGALS3BP</i>   | lectin, galactoside-binding, soluble, 3 binding protein               | 17 | 76.967337-76.976061   |
| ENSG00000180843 | <i>AC124319.2</i> | Protein ALO17 (ALK lymphoma oligomerization partner on chromosome 17) | 17 | 78.234667-78.310304   |



|                 |                     |                                                                                    |    |                     |
|-----------------|---------------------|------------------------------------------------------------------------------------|----|---------------------|
| ENSG00000130589 | <i>RP4-697K14.2</i> | Peroxisomal proliferator-activated receptor A-interacting complex                  | 20 | 62.189439-62.205592 |
| ENSG00000157601 | <i>MX1</i>          | myxovirus (influenza virus) resistance 1, interferon-inducible protein p78 (mouse) | 21 | 42.792231-42.831141 |

\*Table is sorted according to chromosome number (Chr) and genomic location of each gene

### Combined In situ hybridisation and immunohistochemistry

Immunofluorescent *in situ* hybridization was performed using 10 µm thick SHR heart cryosections. Sections were fixed in 4% (w/v) paraformaldehyde, incubated with 1 µg/ml proteinase K (Sigma) and re-fixed in 4% (w/v) paraformaldehyde. Sections were pre-hybridised in hybridisation buffer (50% formamide, 5X SSC buffer, 250 µg/ml yeast RNA, 1× Denhardt's solution in DEPC treated water), incubated with 2 µM *Ebi2*-specific locked nucleic acid probe (5' AAAGAATCGGTCTATGCTCAAACA 3') or scrambled probe (5' GTGTAACACGTCTATACGCCCA 3') 5' labelled with digoxigenin (DIG) (Exiquon, Denmark) in hybridisation buffer for 18 h. Sections were washed twice in buffer (50% (v/v) formamide, 5X SSC buffer in DEPC-treated water), incubated in blocking buffer (10% (v/v) sheep serum), and hybridised with sheep anti-DIG fAb fragments labelled TRITC diluted in 10% (v/v) sheep serum (Roche Diagnostics). Sections were washed in PBS and incubated with 10% rabbit serum and hybridised overnight at room temperature with anti-Cd68-ALEXA488 antibody (MCA341A488, AbD Serotec, Oxford UK) at 1 µg/ml in 10% rabbit serum in PBS. Nuclei were stained with DAPI. Sections were imaged using Leica SP1 confocal microscope.

### Quantitative PCR analysis

cDNA were synthesized from DNase I (Invitrogen) treated total RNA samples using iScript™ cDNA Synthesis Kit (Bio-Rad) following manufacturer's protocol. QPCR was performed using SYBR® Green JumpStart *Taq* Ready Mix (Sigma) or Taqman probes (ABI) following manufacturer's protocol. PCR conditions: 94 °C for 2 minutes (SYBR® Green) or 10 minutes (TaqMan) followed by 40 cycles of 94 °C for 15 seconds, 60 °C for 1 minute and 72 °C for 1 minute, with data collection at end of each cycle.

Primers: *Phgdh1* F: CTGGATTATCTCCGGCATGT, *Phgdh1* R: GGTGGGTTCTGAAGATGAGAAG, *Clybl* F: GCCTGGGAATGACGAAAAGA, *Clybl* R: GCAGTCCAGCACAGCACAAT, *Gpr18* F: GCCGAAATACGCCAAGGA, *Gpr18* R:

CATTATCCAGACCCCCACAC, *Tm9sf2* F: AGAGGAGGCCATAATACTGACGAT, *Tm9sf2* R: TCCACCTACCGAGTCTAGAAAACC, *Cd68* F: CTGTTGCCGAAATACAAGCA, *Cd68* R: GGCAGCAAGAGAGATTGGTC, *Irf7* F: GTGTGCCCTGGAAGCATTTC, *Irf7* R: AGCCCAGGCCTTGAAGATCT, *Ly6c* F: CTGGCCCTACTGTGTGCAGAA, *Ly6c* R: TGTCCGTCTTACAGAGCCCTCTA, *Ly6e* F: 5' GGCTTCGGGAATGTCAACCT, *Ly6e* R: GCAGTGGGATACTAGCACGAAGTC, *Stat1* F: 5' GAACGTGCTCTGCTCAAGGA, *Stat1* R: GTCGGGTTACCTCCATTTTG, *Irf27* F: 5' GCTTCACTGGGTCAGGCATT, *Irf27* R: TCCTATGGCTGCCCAACA, *Oas1a* F: GCCCAACCAAGCTTAAGAGTC, *Oas1a* R: GTTCCAAGATTGTCCGGAAG, *Lgals3bp* F: ACAGTGTGCGACAACCTCTG, *Lgals3bp* R: GACTCGTTCCCTGTGCATTTC; *Ebi2* TaqMan Probe (Rn01468255\_m1), *Dock9* TaqMan Probe (Rn01468134\_m1). Data were analyzed using  $\Delta$ Ct or  $\Delta\Delta$ Ct techniques<sup>10</sup> as detailed in the text.

### RNA-Sequencing

RNA-Sequencing was performed upon pooled, poly(A) enriched RNA from left ventricle (LV) tissue from four BN rats aged 6-8 weeks (Charles River). Total RNA was extracted from frozen tissue using TRIzol & RNeasy columns (Qiagen). RNA was enriched for poly(A) transcripts using an oligo-dT pull down with Poly(A) Purist kit (Ambion). Equal amounts of poly(A) RNA from BN biological replicates were pooled and whole transcriptome libraries prepared with Whole Transcriptome Analysis Kit (Ambion). Sequencing beads were prepared using standard protocols from Applied Biosystems. One flow was sequenced using the Applied Biosystems SOLiD V2 system, at 40 bases per bead. Reads were aligned to the rat reference genome (RGSC 3.4 assembly) using the Whole Transcriptome pipeline (<http://solidsoftwaretools.com>, Applied Biosystems). A total of 150 million reads were generated (6Gb), of which 50% mapped to the reference BN genome, 35% to unique positions. Reads mapping to genes within the locus controlling the rat iDIN were quantified at the exonic and whole transcript level.

### Characterization of *Ebi2* expressing cells in *Ebi2*<sup>GFP/+</sup> mouse

Tissues were isolated from adult *Ebi2*<sup>GFP/+</sup> mice that were 7 generations backcrossed to C57Bl/6J<sup>11</sup>. Each organ was cut into small pieces (approx. 0.5 cm diameter), fixed in 4%

PFA for 2 hours, washed in PBS for 10 minutes 4-6 times, and then dehydrated overnight in 30% sucrose in PBS. The tissue was then flash-frozen in OCT in a dry ice/ethanol bath. Antibodies were diluted in 0.3% Triton-X100, 0.2% BSA, and 0.1% sodium azide to stain 7um sections. Tissues were stained with anti-CD11b-PE (clone M1/70, Invitrogen), anti-CD16/32-Alex Fluor 647 (clone 2.4G2, UCSF Hybridoma and Monoclonal Antibody Core), rabbit anti-GFP (Invitrogen) and anti-rabbit-FITC (Caltag). All images were collected on a Zeiss AxioObserver Z1 microscope and processed using Adobe PhotoShop CS2. Images are representative of 1-2 mice.

### **Luciferase assay**

COS7 cells ( $2 \times 10^5$ ) were plated in a 24-well plates and transfected with (0.2µg) empty pGL3 promoter (Promega), pGL3promoter with the BN 5'UTR upstream of Firefly luciferase (BN-pGL3) or pGL3promoter with the SHR 5'UTR upstream of Firefly luciferase (SHR-pGL3). All cells were also co-transfected with pRL-SV40 (Promega) using (2µl) Lipofectamine 2000 (Invitrogen). 24h post-transfection, cells were washed with PBS and then lysed in 100µl 1x passive lysis buffer (Promega) on a rocking platform for 30min at room temperature. 50µl/well lysate (in duplicate) was transferred to a white opaque plate, followed by addition of dual-glo reagent (50µl/well; Promega). After 15m, the plate was read on a GloMax®-96 microplate Luminometer (Promega). For Renilla luminescence, 50µl/well freshly prepared stop-glo reagent (Promega) was added. After 15m, the plate was read on a GloMax®-96 microplate Luminometer (Promega). Data was determined as Firefly luminescence/Renilla Luminescence.

*BN and SHR 5'UTRs with the 5'UTR SNP underlined and in bold:*

BN 5'UTR upstream of Firefly luciferase in the BN-pGL3promoter:

GAAAAGGCACCACCATAAAAGGACGCCTGCTCAGTCGCTCTTAAAGCAACATGCC  
CAGTTCAGCTGACTCCAGTCTGGGCAAACAC**A**GACGGCCACCTTGGAGGCTCTAG  
CCACCCTCTGATACTAACTCTGACCACTGCGGATACAGAAA

BN 5'UTR upstream of Firefly luciferase in the SHR-pGL3promoter:

GAAAAGGCACCACCATAAAAGGACGCCTGCTCAGTCGCTCTTAAAGCAACATGCC  
CAGTTCAGCTGACTCCAGTCTGGGCAAACAC**G**GACGGCCACCTTGGAGGCTCTAG  
CCACCCTCTGATACTAACTCTGACCACTGCGGATACAGAAA

### **Bone marrow-derived macrophage (BMDM) culture and *Ebi2* silencing by siRNA**

BMDM were cultured as previously described<sup>12</sup>. Briefly, femurs from adult BN rats were isolated and flushed with Hank's buffer (Gibco). Total bone marrow-derived cells were plated and cultured for 5 days in DMEM (Gibco) supplemented with 25% L929 conditioned media, 25% fetal bovine serum (Gibco), penicillin (100U/ml, Invitrogen) and streptomycin (100µg/ml, Invitrogen). Adherent BMDM were seeded in six-well plates (10<sup>6</sup> cells per well) and treated with DMEM on the day before siRNA transfection. Cells were transfected with ON-TARGETplus SMARTpool siRNA (100nmol/L), which consists four individual siRNAs targeting rat *Ebi2* (Dharmacon, Thermo Scientific). For control, cells were transfected with ON-TARGETplus Non-Targeting siRNA (Dharmacon, Thermo Scientific). Cells were harvested 48 hours after transfection. Total RNA samples were prepared using RNeasy spin columns (QIAGEN).

### **T1D sample selection and genotyping**

Analysis of SNPs across the region was described elsewhere<sup>13</sup>. SNP rs9585056 was genotyped using TaqMan (Applied Biosystems) on a subset of samples used in a genomewide scan for T1D<sup>13,14</sup>, additional case-control samples, and a set of samples from 3,733 families with T1D affected offspring. All samples have been described previously<sup>14,15</sup>. Briefly, all subjects were of White European ancestry, and samples were excluded if they showed evidence of non-European ancestry, or of being duplicates of or closely related to another sample in the study. All Taqman genotyping data were scored twice to minimize error; the second operator was unaware of case-control status and family structure.

#### *Association testing of rs9585056 with T1D*

We used logistic regression to test for association in case control samples, stratifying by broad UK region to control for population structure. Family data were analysed by transmission disequilibrium test, splitting multiplex families into parent offspring trios and using a pseudo-case control framework to estimate allelic effects. A score statistic was also generated, and a score test for association in case-controls and families combined conducted by summing the scores and variances according to the method proposed by Mantel<sup>16</sup>.

## Cross species cell type enrichment analysis

Cell type enrichment analysis was performed on the mouse and human homologues of the genes of the rat iDIN network. Gene expression profiles for both mouse and human were downloaded from Novartis BioGPS (<http://biogps.gnf.org/downloads>) listed under Gene Expression Omnibus (GEO) code GSE1133<sup>17</sup> and GSE10246<sup>18</sup>; disease cell types were removed from both datasets prior to analysis. There were 135 genes in the rat iDIN for which there were both mouse and human orthologues and 71 human and 65 mouse cell types, respectively. We tested each gene for extreme expression in a given cell type, compared to its average expression across all cell types and tissues, using the Z-test in separately in both species. Combined *P*-values were calculated across genes using Fisher's combined probability test where the logged *P*-values calculated across cell types were summed and multiplied by negative two, following equation<sup>19,20</sup>:

$$X^2 = -2 \sum_{i=1}^k \ln(p_i).$$

The test statistic follows a  $\chi^2$  distribution with  $2n$  degrees of freedom, with  $n$  being the number of tests performed. A Bonferroni correction was then applied to the combined *p*-values to correct for multiple testing.

## Bayesian mapping of regulatory 'hot-spots' for the rat network

### *Genotypes imputation*

Missing genotype values (accounting for 1.2% of the total number of SNPs) were imputed using fastPHASE 1.2<sup>21</sup>, using 29 RI strains and using 10 replicated analyses with different random starts. We also performed the analysis without specifying the number of groups: in this case fastPHASE correctly identified the two strains in the population. To exclude SNPs in perfect linkage disequilibrium, we removed redundant SNPs with  $r^2 = 1$ . This delineated a set of 1,304 informative SNPs across the rat genome.

### *Sparse Bayesian Regression (SBR)*

Association between expression levels of the network genes and all informative SNPs was carried out using Bayesian multiple linear regression. Since the number of SNPs highly supersedes the number of observations, a sparse detection of the combination of SNPs that explain variation in gene expression was imposed. For each transcript, *a priori* the expected number of distinct genetic control points was set between 0 and 4. To prevent the search algorithm to be stuck in local modes of the model space, a new sampling algorithm, Sparse Bayesian Regression (SBR)<sup>22,23</sup> has been designed: it combines ideas from Genetic Algorithms and Markov Chain Monte Carlo<sup>24</sup> with different tempered chains run in parallel each of which able to explore different regions of the model space.

For each tissue  $t = 1, \dots, T$  and for each gene  $g$ ,  $g = 1, \dots, G_t$ , we regressed the  $n \times 1$  gene expression level  $y_{tg}$  on the  $n \times p$  set  $X$  of non-redundant SNPs. For each gene  $g$ , we recorded the models  $\gamma_{tg}$  visited during the search and we ranked them according to their posterior model probability  $p(\gamma_{tg} | y_{tg})$ , where the binary latent vector  $\gamma_{tg}$ ,  $\gamma_{tg} = (\gamma_{tg1}, \dots, \gamma_{t gj}, \dots, \gamma_{t gp})^T$  with  $\gamma_{t gj} = \{0, 1\}$ ,  $j = 1, \dots, p$ , indicates the subset of SNPs that predict  $y_{tg}$ . The best model visited,  $\gamma_{tg}^B$ , represents the best combination of SNPs that explains the variability in the gene expression level for a particular transcript. We also calculate, in a post-processing analysis, the marginal posterior probability of inclusion  $p_{t gj} = p(\gamma_{t gj} | \gamma_{t g \setminus j})$ , where  $\gamma_{t g \setminus j}$  indicates all the SNPs, but the  $j$ th. The marginal posterior probability of inclusion measures the strength of association between the  $j$ th SNP and the  $g$ th gene in the  $t$ th tissue conditionally on all the other SNPs. The SBR algorithm was run for 50,000 sweeps, with 10,000 as burn-in, running in parallel three chains each of which with a different temperature. The different temperatures have the effect of flattening the posterior distribution (likelihood  $\times$  prior). This ensures that it is not trapped in any local mode and that the algorithm mixes efficiently, since every chain constantly tries to transmit information about its state to the others<sup>25</sup>. Convergence of the Markov Chain Monte Carlo have been evaluated looking at the trace of  $\gamma_{tg}$  and counting

the number of times the algorithm visits the same top model, ranked by the posterior model probability, in the two halves of the sweeps.

#### *False Discovery Rate calculation*

We derived a procedure to declare a significant association between each SNP  $j$  and all the network genes  $G_t$  for a given FDR level. In each tissue  $t$ , we consider all the  $G_t \times p$  marginal posterior probabilities  $p_{t_{gj}}$  assuming exchangeability among the genes. Then we estimated the null and the alternative distribution by fitting a mixture of beta distributions with unknown number of components on the  $G_t \times p$  set of marginal posterior probabilities<sup>26</sup>. The Expectation Maximization (EM) algorithm<sup>27</sup> was used to fit the beta mixture on the set of  $G_t \times p$  marginal posterior probabilities  $p_{t_{gj}}$ . We repeated the analyses with 2, 3, 4 and 5-components mixture, respectively, assuming that the alternative distribution is represented by the right outermost component. Finally the best fit was judged using Bayesian Information Criterion (BIC)<sup>28</sup> with the 2-components mixture able to better conformed to the data in all tissues. A by-product of the EM algorithm is  $p(z_{t_{gj}} = 1)$  which represents, for the 2-component mixture, the posterior probability that  $p_{t_{gj}}$  belongs to the alternative distribution, whereas  $z_{t_{gj}}$  indicates the latent allocation variable for  $p_{t_{gj}}$ . For a fixed level of the FDR, the classification probability  $p(z_{t_{gj}} = 1)$  can be used to calculate the cut-off  $c_t$  above which the association between the gene  $g$  and the SNP  $j$  is called significant with strength  $p_{t_{gj}}$ . Following Lewin and Richardson<sup>29</sup>, the optimal cut-off  $c_t$  is obtained such that the estimated FDR is not greater than the desired one. Once  $c_t$  is derived, all  $p_{t_{gj}}$  for which  $p(z_{t_{gj}} = 1) > c_t$ ,  $g = 1, \dots, G_t$ ,  $j = 1, \dots, p$ , are classified as belonging to the alternative distribution and all the corresponding gene-SNP associations are called significant. To call significant associations between the genes in tissues  $t$  and the SNPs we fixed the FDR level at 1%.

#### *Identification of regulatory hot-spots*

For each tissue  $t$ , it is possible to count the number of control points between the  $j$ th SNP,  $j = 1, \dots, p$ , and all the network genes at a given FDR level. Similarly to Schadt et

al<sup>30</sup>, we ranked the SNPs according to the number of associated network genes focusing on the top 10 regulatory ‘hot-spots’. In addition, we also measured a rescaled average strength of association  $m_{ij}$ , (and  $\alpha\%$  percentiles,  $q_{ij}(\alpha)$ ) between each of the 10 putative regulatory hot-spot and the network genes as

$$m_{ij} = f_t \frac{1}{|\mathcal{G}_j|} \sum_{g \in \mathcal{G}_j} p_{tgi},$$

where  $j \in \mathcal{J}$ , with  $\mathcal{J}$  the set 10 putative master regulators,  $|\mathcal{G}_j|$  indicates the number of associated genes for SNP  $j$ th and  $p_{tgi}$  is marginal posterior probability of inclusion at a

fixed FDR level. Finally,  $f_t$ ,  $f_t = \frac{|\mathcal{G}_j|}{\max_{j \in \mathcal{J}} |\mathcal{G}_j|}$  is a rescaling factor that equalizes means

(and percentiles) such as all the putative master regulators, in the  $\mathcal{J}$  set, control the same number of network genes. To compare the strength of the association between each putative master regulator and the network genes, we used the Bayes Factor<sup>31</sup>. Given  $p_{tgi}$  at a fixed FDR level, the Bayes Factor is defined as the ratio of posterior odds on prior odds

$$BF(\gamma_{tgi} = 1; \gamma_{tgi} = 0) = \frac{p_{tgi} / (1 - p_{tgi})}{\frac{E(p_{\gamma_{tgs}})}{p} / \left(1 - \frac{E(p_{\gamma_{tgs}})}{p}\right)},$$

where  $E(p_{\gamma_{tgs}})$  is the expected number of control points in the  $t$ th tissue for the  $g$ th gene (fixing  $E(p_{\gamma_{tgs}}) = 2$  with  $p = 1,304$ , the prior probability for the  $j$ th SNP associated with the  $g$ th gene is 0.0015). Finally, following Servin and Stephens<sup>32</sup>, we define the rescaled average Bayes Factor over the set  $\mathcal{G}_j$  for  $j \in \mathcal{J}$  as

$$m_{ij}^{BF} = \frac{1}{\max_{j \in \mathcal{J}} |\mathcal{G}_j|} \sum_{g \in \mathcal{G}_j} BF(\gamma_{tgi} = 1; \gamma_{tgi} = 0).$$

In Fig. 2, for each of the ten putative master regulators, the rescaled Bayes Factors are indicated as circles. Values of the Bayes Factor less than one, do not support genetic control. Poor, substantial, strong and decisive evidence for common genetic regulation



by the same SNP is declared if the Bayes Factor is between 1 and 3.2, 3.2 and 10, 10 and 100 and greater than 100, respectively<sup>31</sup>.

### **Cardiogenics sample and expression analysis**

The Cardiogenics study included 758 individuals, including 363 patients with coronary artery disease (CAD) or myocardial infarction (MI) and 395 healthy individuals of European descent recruited in five centers within the Cardiogenics consortium (<http://www.cardiogenics.eu>). Healthy individuals were recruited in Cambridge (UK). CAD/MI patients (n=459) were recruited in Leicester (n=161), Lübeck (n=102), Regensburg (n=122) and Paris (n=74). The study was approved by the Institutional Ethical Committee of each participating center. Blood samples (30ml) from fasting subjects were collected into EDTA and monocytes were isolated with CD14 micro beads using AutoMACs/AutoMACs Pro (Miltenyi) according to the manufacturer's instructions. Monocyte purity was measured as the percentage of CD14<sup>+ve</sup> cells analyzed by flow cytometry. Isolated monocytes were lysed in Trizol and RNA was extracted in chloroform and ethanol, washed in RNeasy columns (Qiagen) and incubated with DNase 1 before extracting in RNase-free water. RNA was quantified by the Nanodrop® method. Genomic DNA was extracted from peripheral blood monocytes by standard procedures (Qiagen) and sent to the Sanger Institute for genotyping.

Gene expression profiling was performed using the Illumina's Human Ref-8 Sentrix Bead Chip arrays (Illumina Inc., San Diego, CA) containing 24,516 probes corresponding to 18,311 distinct genes and 21,793 Ref Seq annotated transcripts. mRNA was amplified and labelled using the Illumina Total Prep RNA Amplification Kit (Ambion, Inc., Austin, TX). After hybridization, Array images were scanned using the Illumina BeadArray Reader and probe intensities were extracted using the Gene expression module (version 3.3.8) of the Illumina's Bead Studio software (version 3.1.30). Raw intensities were processed in R statistical environment using the Lumi and beadarray packages. All array outliers were excluded and only arrays with high concordance in terms of gene expression measures (pairwise Spearman correlation coefficients within each cell type >0.85) were included in the analyses. After data quality control, 849 monocyte RNA samples were available for statistical analyses. Whole-genome genotyping was carried out using two arrays, the Sentrix Human Custom 1.2M array (1,115,839 SNPs and

80,128 CNVs) and the Human 610 Quad Custom array (594,398 SNPs and 66,049 CNVs) (Illumina). After filtering, which was based on sample call rate, ancestry, duplications and genetic relatedness; 758 were used for further analyses. Subsequent filtering removed SNPs if they had (i) a per-SNP call rate lower than 95% in cases or controls on the two arrays, and/or (ii) a minor allele frequency (MAF) of 1% in cases or in controls and/or (iii) a MAF in controls generated using the Illumina 1.2 M or in those generated on the 670k array and/or (iv) a significant deviation from Hardy-Weinberg equilibrium in the controls ( $P < 10^{-5}$ ). Furthermore, all SNPs on the Y and mitochondrial chromosomes as well as CNV markers were excluded from statistical analysis. After per-SNP data quality control, 522,603 SNPs represented on the two arrays and that passed the quality control, were used for further analyses.

#### *Co-expression network analysis*

To build the co-expression network centred on *IRF7*, we correlated expression profiles of all genes that were analyzed for the Gutenberg Heart Study (GHS) versus the predicted *IRF7* targets. Correlation coefficients were computed after stratification for the centre and we estimated the FDR using the Strimmer approach<sup>9,33</sup>. In keeping with the analysis in the GHS study, we applied a threshold of FDR < 0.001 to identify the significant set of adjacent genes (i.e., co-regulated genes). This threshold corresponded to an absolute correlation of at least 0.53. We have identified a set of 791 genes that are co-expressed with the core set of predicted *IRF7* targets. The overlap with the GHS expression network comprises 186 genes ( $P = 8.32 \times 10^{-23}$ ) and Gene Ontology (GO) enrichment analysis showed the strongest enrichment for immune response ( $P = 1.31 \times 10^{-11}$ ) and response to virus ( $P = 4.68 \times 10^{-11}$ ) categories, respectively.

#### **Association of genetic variation and *EBI2* expression**

Association between SNPs at the chromosome 13 locus and *EBI2* mRNA abundance was assessed by linear regression. The subset of SNPs sufficient to explain *EBI2*-gene-expression variation at the locus was determined by using the lasso shrinkage and selection method for linear regression<sup>34</sup>.

## Association of human iDIN with the chromosome 13 locus

We carried out multivariate analysis of variance (MANOVA)<sup>35</sup> to determine whether the chromosome 13q32 locus is associated with monocyte expression of *IRF7* and all predicted *IRF7* targets in the GHS and Cardiogenics cohorts. For each SNP at the chromosome 13q32 locus, one-way MANOVA analysis was performed to test the hypothesis that the mean expression levels of *IRF7*-target genes are the same in all genotypes categories. Among the different statistics that can be used to evaluate the MANOVA hypothesis, we employed the Pillai' trace, which is more robust to violations of normality and homogeneity of dispersion<sup>36</sup>. Significant associations between network genes and SNPs at the locus were assessed using Storey's FDR at the 5% level<sup>37</sup>.

We also verified the validity of the two most important assumptions of MANOVA analysis, namely, multivariate normality and, conditionally to each SNP, the homogeneity of variance-covariances matrices. We performed multivariate Box-Cox transformation to protect against deviations from the normality assumption, while the homogeneity of variance-covariances matrices among groups was assessed using Box's M statistics<sup>38</sup>. To ensure that the MANOVA results presented in the manuscript are not affected by these factors, we repeated all analyses using the rank-based Wilks' lambda MANOVA<sup>39</sup>, which is robust to violations of both conditions. The results of the rank-based MANOVA analysis supported the original MANOVA findings in the Cardiogenics cohort for six out of seven SNPs in the region (see Table below). Similar analyses in the GHS cohort did not detect a significant association of *IRF7* or *IRF7* target genes with SNPs at this locus (data not shown).

### Significant MANOVA results at the chromosome 13q32 locus in the Cardiogenics cohort

| SNPs      | MANOVA                   | Rank-based MANOVA        |
|-----------|--------------------------|--------------------------|
| rs7991143 | $P = 1.4 \times 10^{-3}$ | $P = 0.06$               |
| rs3759443 | $P = 1.6 \times 10^{-4}$ | $P = 0.04$               |
| rs3809367 | $P = 1.6 \times 10^{-4}$ | $P = 0.04$               |
| rs1923891 | $P = 1.6 \times 10^{-4}$ | $P = 0.04$               |
| rs9557217 | $P = 5.0 \times 10^{-5}$ | $P = 3 \times 10^{-4}$   |
| rs7998284 | $P = 1.0 \times 10^{-3}$ | $P = 0.01$               |
| rs9585056 | $P = 1.1 \times 10^{-3}$ | $P = 5.0 \times 10^{-3}$ |

## Association of iDIN genes with T1D

To examine whether genes in the network were generally associated with T1D, we divided SNPs genotyped in T1D genome-wide association (GWA) scans into two:

*A*: those within 1Mb of any gene in the network, and

*B*: those within 1Mb of any ENSEMBL gene not in network, excluding any in *A*

We used a Wilcoxon rank test to examine whether the distribution of association statistics varied between sets *A* and *B*, on the basis of their one degree of freedom  $\chi^2$  test statistics. Note that this approach tests the null hypothesis that the pattern of association is the same in the two datasets, rather than a null that no SNPs in *A* are associated with T1D<sup>40</sup>. We chose to use a nonparametric approach due to the extreme right skew displayed by test statistics for T1D;  $\chi^2$  values above 300 are seen for SNPs in the strongly associated HLA region. The more commonly used gene set enrichment analysis is based around the Kolmogorov-Smirnov test, which is underpowered for detecting differences in distributions<sup>41</sup>. To avoid potential confounding by allele frequency, we applied inverse probability weighting to the ranks used in the Wilcoxon according to a propensity score measuring the chance of a SNP appearing in the “inside” network group, given minor allele frequency<sup>42,43</sup>. The propensity score was calculated by binning minor allele frequencies into bins of width 0.05 and taking the ratio of the number of SNPs in *A+B* and the number in *A*.

Correlation between SNPs is substantial in GWA data. While the Wilcoxon test has the helpful property that the mean under the null is unaffected by correlation, correlation does lead to inflation of the standard deviation of the test statistic which we estimated by 200 permutations of the case control labels. Finally, because the GWA datasets were generated on different chips (Affymetrix and Illumina) we used a stratified Wilcoxon<sup>44</sup> to avoid confounding by chip.

Because we have both human- and rat-derived networks, and because HLA shows extreme association with T1D, we performed four tests:

1. genes in either rat or human networks
2. genes in both rat and human networks, restricting set *B* to genes with a rat orthologue
3. genes in both rat and human networks, excluding SNPs from *A* or *B* within a wide window around human MHC (chr6:29000000..34600000)

4. genes in both rat and human networks, restricting set  $B$  to genes in the rat orthologue database and excluding SNPs from  $A$  or  $B$  within a wide window around human MHC (chr6:29000000..34600000)

Since many immune and viral response genes have been associated to T1D previously, we tested our sets against different background sets of genes: the whole genome and genes annotated to the GO term “immune response”.

## References

- 1 Irizarry, R. A. et al. Summaries of Affymetrix GeneChip probe level data. *Nucleic Acids Res* 31, e15, (2003).
- 2 Hubner, N. et al. Integrated transcriptional profiling and linkage analysis for  
3 identification of genes underlying disease. *Nat Genet* 37, 243-253, (2005).
- 4 Petretto, E. et al. Integrated genomic approaches implicate osteoglycin (Ogn) in  
5 the regulation of left ventricular mass. *Nat Genet* 40, 546-552, (2008).
- 6 Saar, K. et al. SNP and haplotype mapping for genetic analysis in the rat. *Nat*  
7 *Genet* 40, 560-566, (2008).
- 8 Wang, J., Williams, R. W. & Manly, K. F. WebQTL: web-based complex trait  
9 analysis. *Neuroinformatics* 1, 299-308, (2003).
- 10 Matys, V. et al. TRANSFAC and its module TRANSCompel: transcriptional gene  
11 regulation in eukaryotes. *Nucleic Acids Res* 34, D108-110, (2006).
- 12 Roeder, H. G., Manke, T., O'Keefe, S., Vingron, M. & Haas, S. A. PASTAA:  
13 identifying transcription factors associated with sets of co-regulated genes.  
14 *Bioinformatics* 25, 435-442, (2009).
- 15 De Santa, F. et al. Jmjd3 contributes to the control of gene expression in LPS-  
16 activated macrophages. *EMBO J* 28, 3341-3352, (2009).
- 17 Strimmer, K. A unified approach to false discovery rate estimation. *BMC*  
18 *Bioinformatics* 9, 303, (2008).
- 19 Bustin, S. A. Absolute quantification of mRNA using real-time reverse  
20 transcription polymerase chain reaction assays. *J Mol Endocrinol* 25, 169-193,  
21 (2000).
- Pereira, J. P., Kelly, L. M., Xu, Y. & Cyster, J. G. EBI2 mediates B cell  
segregation between the outer and centre follicle. *Nature* 460, 1122-1126,  
(2009).
- Behmoaras, J. et al. Jund is a determinant of macrophage activation and is  
associated with glomerulonephritis susceptibility. *Nat Genet* 40, 553-559, (2008).
- Barrett, J. C. et al. Genome-wide association study and meta-analysis find that  
over 40 loci affect risk of type 1 diabetes. *Nat Genet*, (2009).
- Genome-wide association study of 14,000 cases of seven common diseases and  
3,000 shared controls. *Nature* 447, 661-678, (2007).
- Wallace, C. et al. The imprinted DLK1-MEG3 gene region on chromosome  
14q32.2 alters susceptibility to type 1 diabetes. *Nat Genet*, (2009).
- Mantel, N. Chi-square tests with one degree of freedom: Extensions of the  
Mantel-Haenszel procedure. *J Am Stat Assoc* 690-700, (1963).
- Su, A. I. et al. A gene atlas of the mouse and human protein-encoding  
transcriptomes. *Proc Natl Acad Sci U S A* 101, 6062-6067, (2004).
- Lattin, J. E. et al. Expression analysis of G Protein-Coupled Receptors in mouse  
macrophages. *Immunome Res* 4, 5, (2008).
- Fisher, R. A. *Statistical Methods for Research Workers.* (Oliver and Boyd,  
Edinburgh, 1932).
- Hess, A. & Iyer, H. Fisher's combined p-value for detecting differentially  
expressed genes using Affymetrix expression arrays. *BMC Genomics* 8, 96,  
(2007).
- Scheet, P. & Stephens, M. A fast and flexible statistical model for large-scale  
population genotype data: applications to inferring missing genotypes and  
haplotypic phase. *Am J Hum Genet* 78, 629-644, (2006).

22 Petretto, E. et al. New insights into the genetic control of gene expression using a  
Bayesian multi-tissue approach. *PLoS Computational Biology* 6, (2010).

23 Bottolo, L. & Richardson, S. Evolutionary Stochastic Search for Bayesian model  
exploration. *To appear in Bayesian Analysis*, (2010).

24 Liang, F. & Wong, W. H. Evolutionary Monte Carlo: application to Cp model  
sampling and change point problem. *Stat. Sinica* 10, 317-342, (2000).

25 Iba, Y. Extended Ensemble Monte Carlo. *Int. J. Mod. Phys., C* 12, 623-656,  
(2001).

26 Efron, B. Microarrays, empirical Bayes and the two-groups model. *Stat. Science*  
23, 1-22, (2008).

27 McLachlan, G. & Peel, D. Finite mixture models. (2000).

28 Allison, D. B. et al. A mixture model approach for the analysis of microarray gene  
expression data. *Computational Statistics & Data Analysis* 39, 1-20, (2002).

29 Lewin A. and Richardson, S. in *Handbook of Statistical Genetics*, 3rd edition (ed  
Martin Bishop and Chris Cannings David Balding) (Chichester: Wiley, 2007).

30 Schadt, E. E. et al. Genetics of gene expression surveyed in maize, mouse and  
man. *Nature* 422, 297-302, (2003).

31 Kass, R. E. & Raftery, A. E. Bayes Factors. *Journal of the American Statistical  
Association* 90, 773-795, (1995).

32 Servin, B. & Stephens, M. Imputation-based analysis of association studies:  
candidate regions and quantitative traits. *PLoS Genet* 3, e114, (2007).

33 Strimmer, K. fdrtool: a versatile R package for estimating local and tail area-  
based false discovery rates. *Bioinformatics* 24, 1461-1462, (2008).

34 Tibshirani, R. The lasso method for variable selection in the Cox model. *Stat Med*  
16, 385-395, (1997).

35 Morrison, D. F. *Multivariate Statistical methods*. (Belmont, 2004).

36 Olson, C. L. Comparative robustness of six tests in multivariate analysis of  
variance. *Journal of the American Statistical Association* 69, 894- 908 (1974).

37 Storey, J. D. A direct approach to false discovery rates. *J. R. Statist. Soc. B* 63,  
479-498, (2002).

38 Box, G. E. P. Non-normality and tests on variances. *Biometrika* 40, 318-335,  
(1953).

39 Nath, R. & Pavur, R. A new statistic in the one-way multivariate analysis of  
variance. *Computational Statistics & Data Analysis* 2, 297-315, (1985).

40 Tian, L. et al. Discovering statistically significant pathways in expression profiling  
studies. *Proc Natl Acad Sci U S A* 102, 13544-13549, (2005).

41 Irizarry, R. A., Wang, C., Zhou, Y. & Speed, T. P. in *Working Paper 185* (ed  
Dept. of Biostatistics Working Papers Johns Hopkins University) (2009).

42 Rosenbaum, P. R. & Rubin, D. B. The central role of the propensity score in  
observational studies for causal effects. *Biometrika* 70, 41-55, (1983).

43 Rosenbaum, P. R. Model-based direct adjustment. *Journal of the American  
Statistical Association* 82, 387-394, (1987).

44 van Elteren, P. On the combination of independent two sample tests of Wilcoxon.  
*Bulletin of the International Statistical Institute* 37, 351-261, (1960).

## List of contributors to the Cardiogenics Transcriptomic Study

*Department of Cardiovascular Sciences, University of Leicester, Glenfield Hospital, Leicester, LE3 9QP, UK; Peter Braund, Jay Gracey, Unni Krishnan, Jasbir S Moore, Chris P Nelson, Helen Pollard*

*Department of Haematology, University of Cambridge, Long Road, Cambridge, and National Health Service Blood and Transplant, Cambridge Centre, Long Road, Cambridge, CB2 2PT, UK; Tony Attwood, Abi Crisp-Hihn, Nicola Foad, Jennifer Jolley, Heather Lloyd-Jones, David Muir, Elizabeth Murray, Karen O'Leary, Angela Rankin, Jennifer Sambrook*

*INSERM UMRS 937, Pierre and Marie Curie University (UPMC, Paris 6) and Medical School, 91 Bd de l'Hôpital 75013, Paris, France; Tiphaine Godfroy, Jessy Brocheton, Carole Proust*

*Institut für Klinische Chemie und Laboratoriumsmedizin, Universität, Regensburg, D-93053 Regensburg, Germany; Gerd Schmitz*

*Klinik und Poliklinik für Innere Medizin II, Universität Regensburg, Germany; Susanne Heimerl, Ingrid Lugauer*

*Medizinische Klinik 2, Universität zu Lübeck, Lübeck Germany; Stephanie Belz, Stefanie Gulde, Patrick Linsel-Nitschke, Hendrik Sager, Laura Schroeder*

*Molecular Medicine, Department of Medical Sciences, Uppsala University, Uppsala, Sweden; Per Lundmark, Ann-Christine Syvannen*

*Trium, Analysis Online GmbH, Hohenlindenerstr. 1, 81677, München, Germany; Jessica Neudert, Michael Scholz*

*Wellcome Trust Sanger Institute, Wellcome Trust Genome Campus, Hinxton, Cambridge CB10 1SA, UK; Panos Deloukas, Emma Gray, Rhian Gwilliams, David Niblett*



**Supplementary Table 1:** Genome-wide analysis of TF eQTL downstream effects. The table contains results of the PASTAA analysis: Gene symbol and Affymetrix rat230 2.0 probeset id of the TF, transfac matrix identifier of the TF, eQTL marker of the TF, tissue in which expression was measured: (aorta = aorta, adr = adrenal, fat = peritoneal fat, kdn = kidney, lv = left ventricle, liver = liver, skm = skeletal muscle). Optimized P is the most significant *P*-value in the iterated hypergeometric test (see Methods) which results from an intersection of the given size when using the first “cutoff eQTL” transcripts and the first “cutoff TF” predicted transcription factor targets from a universe of genes of size “total” (see Supplementary Information). Set size denotes the total number of genes used as potentially differentially expressed genes. The corrected *P*-value was obtained using permutation testing. The FDR accounts for the total number of 587 TF eQTLs tested.

| TF symbol | TF Probeset | Matrix        | Marker               | Tissue | Optimized P | Intersect | Cutoff eQTL | Cutoff TF | Total | Set size | Corrected P | FDR       |
|-----------|-------------|---------------|----------------------|--------|-------------|-----------|-------------|-----------|-------|----------|-------------|-----------|
| Irf7      | 1383564_at  | V\$IRF7_01    | J666808              | adr    | 1.25E-09    | 4         | 17          | 25        | 27544 | 893      | <1,0E-06    | <5,10E-05 |
| Irf7      | 1383564_at  | V\$IRF7_01    | J666808              | kdn    | 1.37E-08    | 12        | 150         | 250       | 27544 | 883      | <1,0E-06    | <5,10E-05 |
| Irf7      | 1383564_at  | V\$IRF7_01    | J666808              | liver  | 6.06E-12    | 12        | 110         | 175       | 27544 | 893      | <1,0E-06    | <5,10E-05 |
| Irf7      | 1383564_at  | V\$IRF7_01    | J666808              | lv     | 2.60E-13    | 12        | 85          | 175       | 27544 | 871      | <1,0E-06    | <5,10E-05 |
| Atf4      | 1367624_at  | V\$ATF4_Q2    | J5383383             | adr    | 8.30E-11    | 17        | 300         | 200       | 27544 | 868      | <1,0E-06    | <5,10E-05 |
| Atf4      | 1367624_at  | V\$ATF4_Q2    | J540732              | adr    | 8.30E-11    | 17        | 300         | 200       | 27544 | 863      | <1,0E-06    | <5,10E-05 |
| Tcf4      | 1368841_at  | V\$EBOX_Q6_01 | J1268931             | kdn    | 2.11E-07    | 21        | 600         | 254       | 27544 | 862      | 2.10E-05    | 8.81E-04  |
| Stat1     | 1387354_at  | V\$STAT_Q6    | gko-88g11_rp2_b1_418 | lv     | 3.73E-07    | 13        | 78          | 801       | 27544 | 873      | 3.20E-05    | 1.22E-03  |
| E2f1      | 1382511_at  | V\$E2F1_Q4    | WKY-G-i-07e07_r1_602 | aorta  | 1.37E-06    | 7         | 600         | 27        | 27544 | 902      | 1.20E-04    | 3.81E-03  |
| Atf1      | 1389623_at  | V\$CREBATF_Q6 | J519566              | adr    | 1.81E-06    | 35        | 400         | 1002      | 27544 | 873      | 1.51E-04    | 4.53E-03  |
| Atf1      | 1389623_at  | V\$CREBATF_Q6 | J557374              | adr    | 2.62E-06    | 56        | 800         | 1002      | 27544 | 867      | 2.04E-04    | 5.58E-03  |
| Srebf2    | 1371979_at  | V\$SREBP_Q3   | J489757              | fat    | 3.23E-06    | 2         | 2           | 50        | 27544 | 901      | 2.61E-04    | 6.52E-03  |
| E2f1      | 1382511_at  | V\$E2F1_Q4    | WKYc86h09_s1_364     | aorta  | 3.79E-06    | 7         | 700         | 27        | 27544 | 901      | 3.02E-04    | 7.10E-03  |

**Supplementary Table 2:** Genes of the rat *Irf7* driven inflammatory network (iDIN) (n=305 Ensembl genes). Probeset identifiers are for the Affymetrix rat230 2.0 array. Type denotes whether a gene was a confirmed *Irf7* target, a predicted *Irf7* target in adrenal, kidney, left ventricle or liver, or whether it was included in the network expansion using all gene pairs from the Affymetrix rae230a array (expanded 15k) or all available pairs (expanded 30k). NA indicates that the Affymetrix probe did not have an Ensembl gene identifier and/or a gene symbol annotation.

| Probeset     | Symbol                | Ensembl             | Type             | Description                                                                                                    |
|--------------|-----------------------|---------------------|------------------|----------------------------------------------------------------------------------------------------------------|
| 1371152_a_at | <i>Oas1</i>           | ENSRNOG00000001369  | confirmed target | 2',5'-oligoadenylate synthetase 1, 40/46kDa                                                                    |
| 1387946_at   | <i>Lgals3bp</i>       | ENSRNOG00000003217  | confirmed target | lectin, galactoside-binding, soluble, 3 binding protein                                                        |
| 1387770_at   | <i>Ifi271</i>         | ENSRNOG00000009263  | confirmed target | interferon, alpha-inducible protein 27-like                                                                    |
| 1376496_at   | <i>LOC503164</i>      | ENSRNOG000000023410 | predicted target | hypothetical protein LOC503164                                                                                 |
| 1383564_at   | <i>Irf7</i>           | ENSRNOG00000017414  | confirmed target | interferon regulatory factor 7                                                                                 |
| 1373523_at   | <i>Fcgr3a</i>         | ENSRNOG00000024382  | predicted target | Fc fragment of IgG, low affinity IIIa, receptor                                                                |
| 1367696_at   | <i>Ifitm2</i>         | ENSRNOG00000014936  | predicted target | interferon induced transmembrane protein 2 (1-8D)                                                              |
| 1372930_at   | <i>Sp110</i>          | ENSRNOG00000017273  | predicted target | SP110 nuclear body protein                                                                                     |
| 1387605_at   | <i>Casp12</i>         | ENSRNOG00000033434  | predicted target | caspase 12                                                                                                     |
| 1370913_at   | <i>Best5</i>          | ENSRNOG00000007539  | predicted target | Best5 protein                                                                                                  |
| 1390507_at   | <i>Isg20</i>          | ENSRNOG00000018151  | predicted target | interferon stimulated exonuclease 20                                                                           |
| 1399161_a_at | <i>Arts1</i>          | ENSRNOG00000009997  | predicted target | type 1 tumor necrosis factor receptor shedding aminopeptidase regulator similar to interferon-inducible GTPase |
| 1373992_at   | <i>MGC108823</i>      | ENSRNOG00000019542  | predicted target | similar to interferon-inducible GTPase                                                                         |
| 1394819_at   | <i>Sp110</i>          | ENSRNOG00000017273  | confirmed target | SP110 nuclear body protein                                                                                     |
| 1391399_at   | NA                    | NA                  | predicted target | NA                                                                                                             |
| 1379285_at   | <i>Rtp4_predicted</i> | ENSRNOG00000028895  | predicted target | receptor transporter protein 4 (predicted)                                                                     |
| 1391754_at   | <i>Oas1i</i>          | ENSRNOG00000001369  | predicted target | 2' -5' oligoadenylate synthetase 1i                                                                            |
| 1396268_at   | <i>Sp110</i>          | ENSRNOG00000017273  | predicted target | SP110 nuclear body protein                                                                                     |
| 1396163_at   | <i>Igtp</i>           | ENSRNOG00000027008  | predicted target | interferon gamma induced GTPase                                                                                |
| 1374033_at   | <i>Psmb10</i>         | ENSRNOG00000019494  | predicted target | proteasome (prosome, macropain) subunit, beta type 10                                                          |
| 1388056_at   | <i>Oas1b</i>          | ENSRNOG00000001372  | predicted target | 2-5 oligoadenylate synthetase 1B                                                                               |
| 1387897_at   | <i>Cnp1</i>           | ENSRNOG00000017496  | predicted target | cyclic nucleotide phosphodiesterase 1                                                                          |
| 1389873_at   | <i>Pycard</i>         | ENSRNOG00000019675  | predicted target | PYD and CARD domain containing                                                                                 |
| 1373932_at   | NA                    | NA                  | predicted target | NA                                                                                                             |
| 1367595_s_at | <i>B2m</i>            | ENSRNOG00000000414  | expanded 15k     | beta-2 microglobulin                                                                                           |
| 1367663_at   | <i>Psmc1</i>          | ENSRNOG00000019041  | expanded 15k     | proteasome (prosome, macropain) 28 subunit, alpha                                                              |
| 1367679_at   | <i>Cd74</i>           | ENSRNOG00000018735  | expanded 30k     | CD74 antigen (invariant polypeptide of major histocompatibility complex, class II antigen-associated)          |
| 1367710_at   | <i>Psmc2</i>          | ENSRNOG00000019246  | expanded 15k     | proteasome (prosome, macropain) 28 subunit, beta                                                               |
| 1367786_at   | <i>Psmb8</i>          | ENSRNOG00000000456  | expanded 15k     | proteasome (prosome, macropain) subunit, beta type 8                                                           |
| 1367850_at   | <i>Fcgr3</i>          | NA                  | expanded 15k     | Fc receptor, IgG, low affinity III                                                                             |
| 1367861_at   | <i>Evl</i>            | ENSRNOG00000014476  | expanded 15k     | Ena-vasodilator stimulated phosphoprotein 15k                                                                  |

|              |                 |                                           |                 |                                                                               |
|--------------|-----------------|-------------------------------------------|-----------------|-------------------------------------------------------------------------------|
| 1367925_at   | <i>Mvp</i>      | ENSRNOG00000020182                        | expanded<br>15k | major vault protein                                                           |
| 1367973_at   | <i>Ccl2</i>     | ENSRNOG00000007159                        | expanded<br>15k | chemokine (C-C motif) ligand 2                                                |
| 1368006_at   | <i>Laptm5</i>   | ENSRNOG00000011054                        | expanded<br>15k | lysosomal-associated protein<br>transmembrane 5                               |
| 1368073_at   | <i>Irf1</i>     | ENSRNOG00000008144                        | expanded<br>15k | interferon regulatory factor 1                                                |
| 1368187_at   | <i>Gpnmb</i>    | ENSRNOG00000008816                        | expanded<br>15k | glycoprotein (transmembrane) nmb                                              |
| 1368227_at   | <i>Slc28a2</i>  | ENSRNOG00000018204                        | expanded<br>15k | solute carrier family 28 (sodium-coupled<br>nucleoside transporter), member 2 |
| 1368332_at   | <i>Gbp2</i>     | ENSRNOG000000031743                       | expanded<br>15k | guanylate nucleotide binding protein 2                                        |
| 1368356_a_at | <i>Arts1</i>    | ENSRNOG00000009997                        | expanded<br>15k | type 1 tumor necrosis factor receptor<br>shedding aminopeptidase regulator    |
| 1368482_at   | <i>Bcl2a1</i>   | ENSRNOG00000013001                        | expanded<br>15k | B-cell leukemia/lymphoma 2 related<br>protein A1                              |
| 1368515_at   | <i>Epb4.113</i> | ENSRNOG00000016724                        | expanded<br>15k | erythrocyte protein band 4.1-like 3                                           |
| 1368518_at   | <i>Cd53</i>     | ENSRNOG00000017874                        | expanded<br>15k | CD53 antigen                                                                  |
| 1368521_at   | <i>Napsa</i>    | ENSRNOG00000019854                        | expanded<br>15k | napsin A aspartic peptidase                                                   |
| 1368555_at   | <i>Cd37</i>     | ENSRNOG00000020699                        | expanded<br>30k | CD37 antigen                                                                  |
| 1368558_s_at | <i>Aif1</i>     | ENSRNOG00000000151/<br>ENSRNOG00000000165 | expanded<br>15k | allograft inflammatory factor 1                                               |
| 1368693_at   | <i>Fgr</i>      | ENSRNOG000000009912                       | expanded<br>15k | Gardner-Rasheed feline sarcoma viral<br>(Fgr) oncogene homolog                |
| 1368732_at   | <i>Tap2</i>     | ENSRNOG00000000455                        | expanded<br>30k | transporter 2, ATP-binding cassette, sub-<br>family B (MDR/TAP)               |
| 1368742_at   | <i>C5r1</i>     | NA                                        | expanded<br>15k | complement component 5, receptor 1                                            |
| 1368835_at   | <i>Stat1</i>    | ENSRNOG00000014079                        | expanded<br>15k | signal transducer and activator of<br>transcription 1                         |
| 1368973_at   | <i>Adar</i>     | ENSRNOG00000020744                        | expanded<br>15k | adenosine deaminase, RNA-specific                                             |
| 1369029_at   | <i>Plscr1</i>   | ENSRNOG00000008048                        | expanded<br>15k | phospholipid scramblase 1                                                     |
| 1369181_at   | <i>Cybb</i>     | ENSRNOG00000003622                        | expanded<br>15k | cytochrome b-245, beta polypeptide                                            |
| 1369186_at   | <i>Casp1</i>    | ENSRNOG00000007372                        | expanded<br>15k | caspase 1                                                                     |
| 1369204_at   | <i>Hck</i>      | ENSRNOG00000009331                        | expanded<br>15k | hemopoietic cell kinase                                                       |
| 1369290_at   | <i>Ccr5</i>     | ENSRNOG00000006774                        | expanded<br>15k | chemokine (C-C motif) receptor 5                                              |
| 1369393_at   | <i>Map3k8</i>   | ENSRNOG00000016378                        | expanded<br>30k | mitogen-activated protein kinase kinase<br>kinase 8                           |
| 1369549_at   | <i>Klrk1</i>    | ENSRNOG00000009638                        | expanded<br>30k | killer cell lectin-like receptor subfamily K,<br>member 1                     |
| 1369557_at   | <i>Casp7</i>    | ENSRNOG00000016836                        | expanded<br>30k | caspase 7                                                                     |
| 1369559_a_at | <i>Cd47</i>     | ENSRNOG00000001964                        | expanded<br>15k | CD47 antigen (Rh-related antigen,<br>integrin-associated signal transducer)   |
| 1369716_s_at | <i>Lgals5</i>   | ENSRNOG00000012557                        | expanded<br>15k | lectin, galactose binding, soluble 5                                          |
| 1369815_at   | <i>Ccl3</i>     | ENSRNOG00000011205                        | expanded<br>30k | chemokine (C-C motif) ligand 3                                                |
| 1369964_at   | <i>Coro1a</i>   | ENSRNOG00000019430                        | expanded<br>15k | coronin, actin binding protein 1A                                             |
| 1369973_at   | <i>Xdh</i>      | ENSRNOG00000007081/<br>ENSRNOG00000027042 | expanded<br>30k | xanthine dehydrogenase                                                        |
| 1370056_at   | <i>Ly6c</i>     | ENSRNOG00000023397                        | expanded<br>15k | Ly6-C antigen                                                                 |
| 1370090_at   | <i>Lcp2</i>     | ENSRNOG00000005620                        | expanded<br>15k | lymphocyte cytosolic protein 2                                                |
| 1370154_at   | <i>Lyz</i>      | ENSRNOG00000005825                        | expanded<br>15k | lysozyme                                                                      |
| 1370186_at   | <i>Psmb9</i>    | ENSRNOG00000000459                        | expanded<br>15k | proteasome (prosome, macropain)<br>subunit, beta type 9                       |
| 1370215_at   | <i>C1qb</i>     | ENSRNOG00000012749                        | expanded<br>15k | complement component 1, q<br>subcomponent, beta polypeptide                   |
| 1370219_at   | <i>Cyba</i>     | ENSRNOG00000013014                        | expanded        | cytochrome b-245, alpha polypeptide                                           |

|              |                             |                                            |                 |                                                                                          |
|--------------|-----------------------------|--------------------------------------------|-----------------|------------------------------------------------------------------------------------------|
| 1370265_at   | <i>Arrb2</i>                | ENSRNOG00000000373                         | 15k<br>expanded | arrestin, beta 2                                                                         |
| 1370307_at   | <i>Agrn</i>                 | ENSRNOG00000020205                         | 15k<br>expanded | agrin                                                                                    |
| 1370351_at   | <i>Tdrd7</i>                | ENSRNOG00000009985                         | 15k<br>expanded | tudor domain containing 7                                                                |
| 1370400_at   | <i>RT1-N3</i>               | ENSRNOG00000000795                         | 15k<br>expanded | RT1 class Ib gene, H2-TL-like, grc region (N3)                                           |
| 1370422_at   | <i>Ripk3</i>                | ENSRNOG00000020465                         | 15k<br>expanded | receptor-interacting serine-threonine kinase 3                                           |
| 1370449_at   | <i>P2ry14</i>               | ENSRNOG00000013872                         | 15k<br>expanded | purinergic receptor P2Y, G-protein coupled, 14                                           |
| 1370463_x_at | <i>RT1-CE16</i>             | NA                                         | 15k<br>expanded | RT1 class I, CE16                                                                        |
| 1370493_a_at | <i>Lilrb3</i>               | ENSRNOG00000025095                         | 15k<br>expanded | leukocyte immunoglobulin-like receptor, subfamily B (with TM and ITIM domains), member 3 |
| 1370516_at   | <i>Slc15a3</i>              | ENSRNOG00000021644                         | 15k<br>expanded | solute carrier family 15, member 3                                                       |
| 1370628_at   | <i>Gzmb</i>                 | ENSRNOG00000032868                         | 15k<br>expanded | granzyme B                                                                               |
| 1370682_at   | <i>Lilrb3</i>               | ENSRNOG00000025095                         | 15k<br>expanded | leukocyte immunoglobulin-like receptor, subfamily B (with TM and ITIM domains), member 3 |
| 1370693_a_at | <i>Cnp1</i>                 | ENSRNOG00000017496                         | 15k<br>expanded | cyclic nucleotide phosphodiesterase 1                                                    |
| 1370832_at   | <i>Ccl4</i>                 | ENSRNOG00000011406                         | 15k<br>expanded | chemokine (C-C motif) ligand 4                                                           |
| 1370883_at   | <i>RT1-Da</i>               | ENSRNOG00000032844                         | 30k<br>expanded | RT1 class II, locus Da                                                                   |
| 1370885_at   | <i>Ctsz</i>                 | NA                                         | 15k<br>expanded | cathepsin Z                                                                              |
| 1370972_x_at | <i>RT1-Aw2</i>              | ENSRNOG00000000724                         | 15k<br>expanded | RT1 class Ib, locus Aw2                                                                  |
| 1370987_at   | <i>Spn</i>                  | ENSRNOG00000036711                         | 15k<br>expanded | sialophorin                                                                              |
| 1371015_at   | <i>Mx1</i>                  | ENSRNOG00000001959                         | 15k<br>expanded | myxovirus (influenza virus) resistance 1                                                 |
| 1371070_at   | <i>Zbp1</i>                 | ENSRNOG00000006314                         | 15k<br>expanded | Z-DNA binding protein 1                                                                  |
| 1371079_at   | <i>Fcgr2b</i>               | ENSRNOG00000003138                         | 30k<br>expanded | Fc receptor, IgG, low affinity IIb                                                       |
| 1371123_x_at | <i>RT1-S3</i>               | ENSRNOG00000000777/<br>ENSRNOG000000026051 | 15k<br>expanded | RT1 class Ib, locus S3                                                                   |
| 1371209_at   | <i>RT1-Aw2</i>              | ENSRNOG00000000724                         | 15k<br>expanded | RT1 class Ib, locus Aw2                                                                  |
| 1371210_s_at | <i>RT1-Aw2</i>              | ENSRNOG00000000724                         | 15k<br>expanded | RT1 class Ib, locus Aw2                                                                  |
| 1371267_at   | <i>RT1-Aw2</i>              | ENSRNOG00000000724                         | 30k<br>expanded | RT1 class Ib, locus Aw2                                                                  |
| 1371440_at   | <i>B2m</i>                  | ENSRNOG00000000414                         | 15k<br>expanded | beta-2 microglobulin                                                                     |
| 1371447_at   | <i>Plac8_predicted</i>      | ENSRNOG00000002217                         | 15k<br>expanded | placenta-specific 8 (predicted)                                                          |
| 1371925_at   | <i>Atp13a1_predicted</i>    | ENSRNOG00000010776                         | 15k<br>expanded | ATPase type 13A1 (predicted)                                                             |
| 1371987_at   | <i>Pols_predicted</i>       | ENSRNOG00000017613                         | 15k<br>expanded | polymerase (DNA directed) sigma (predicted)                                              |
| 1372034_at   | <i>RGD1310490_predicted</i> | ENSRNOG00000023334                         | 15k<br>expanded | similar to hypothetical protein MGC29390 (predicted)                                     |
| 1372070_at   | <i>Ifi30</i>                | ENSRNOG00000019387                         | 15k<br>expanded | interferon gamma inducible protein 30                                                    |
| 1372097_at   | <i>Irf8</i>                 | ENSRNOG00000017869                         | 30k<br>expanded | interferon regulatory factor 8                                                           |
| 1372112_at   | <i>RGD1304579</i>           | ENSRNOG00000017191                         | 15k<br>expanded | similar to 9230105E10Rik protein                                                         |
| 1372200_at   | <i>Gpsm3</i>                | ENSRNOG00000000441                         | 30k<br>expanded | G-protein signalling modulator 3 (AGS3-like, <i>C. elegans</i> )                         |
| 1372254_at   | <i>Serping1</i>             | ENSRNOG00000007457                         | 30k<br>expanded | serine (or cysteine) peptidase inhibitor, clade G, member 1                              |
| 1372256_at   | <i>LOC691657</i>            | ENSRNOG000000027990                        | 15k<br>expanded | similar to Cysteine-rich protein 1 (Cysteine-rich intestinal protein) (CRIP)             |
| 1372404_at   | <i>Rac2</i>                 | ENSRNOG00000007350                         | 15k<br>expanded | RAS-related C3 botulinum substrate 2                                                     |

|            |                             |                    |                 |                                                                |
|------------|-----------------------------|--------------------|-----------------|----------------------------------------------------------------|
| 1372585_at | <i>RGD1566254_predicted</i> | NA                 | expanded<br>15k | RGD1566254 (predicted)                                         |
| 1372604_at | <i>RGD1309808_predicted</i> | ENSRNOG00000004849 | expanded<br>15k | similar to apolipoprotein L2; apolipoprotein L-II (predicted)  |
| 1372691_at | <i>Upp1</i>                 | ENSRNOG00000004972 | expanded<br>15k | uridine phosphorylase 1                                        |
| 1372757_at | <i>Stat1</i>                | ENSRNOG00000014079 | expanded<br>15k | signal transducer and activator of transcription 1             |
| 1372868_at | <i>Tor3a</i>                | ENSRNOG00000004307 | expanded<br>15k | torsin family 3, member A                                      |
| 1373025_at | <i>C1qg</i>                 | ENSRNOG00000012804 | expanded<br>15k | complement component 1, q subcomponent, gamma polypeptide      |
| 1373037_at | <i>Ube2l6</i>               | ENSRNOG00000007494 | expanded<br>15k | ubiquitin-conjugating enzyme E2L 6                             |
| 1373065_at | <i>Ptpn18</i>               | ENSRNOG00000013415 | expanded<br>15k | protein tyrosine phosphatase, non-receptor type 18             |
| 1373164_at | NA                          | NA                 | expanded<br>30k | NA                                                             |
| 1373197_at | <i>LOC686701</i>            | NA                 | expanded<br>15k | similar to Protein KIAA1404                                    |
| 1373490_at | <i>Gmfg</i>                 | ENSRNOG00000019838 | expanded<br>15k | glia maturation factor, gamma                                  |
| 1373514_at | <i>LOC688296</i>            | ENSRNOG00000003636 | expanded<br>15k | similar to chromosome 17 open reading frame 27                 |
| 1373575_at | <i>LOC498279</i>            | NA                 | expanded<br>15k | similar to NADH dehydrogenase (ubiquinone) Fe-S protein 2      |
| 1373592_at | <i>MGC94010</i>             | ENSRNOG00000033772 | expanded<br>30k | similar to SPI6                                                |
| 1373670_at | <i>Stat2</i>                | ENSRNOG00000031081 | expanded<br>15k | signal transducer and activator of transcription 2             |
| 1373703_at | NA                          | NA                 | expanded<br>15k | NA                                                             |
| 1373757_at | <i>Fln29</i>                | ENSRNOG00000001351 | expanded<br>15k | FLN29 gene product                                             |
| 1373785_at | <i>LOC362792</i>            | ENSRNOG00000028566 | expanded<br>15k | similar to phospholipase D family, member 4                    |
| 1373912_at | <i>Enpp4_predicted</i>      | ENSRNOG00000010174 | expanded<br>30k | ectonucleotide pyrophosphatase/phosphodiesterase 4 (predicted) |
| 1373913_at | <i>Pnpt1</i>                | ENSRNOG00000003600 | expanded<br>15k | polyribonucleotide nucleotidyltransferase 1                    |
| 1374284_at | <i>Rassf4</i>               | ENSRNOG00000013526 | expanded<br>15k | Ras association (RalGDS/AF-6) domain family 4                  |
| 1374337_at | NA                          | NA                 | expanded<br>15k | NA                                                             |
| 1374469_at | <i>RGD1561343_predicted</i> | NA                 | expanded<br>15k | similar to C20orf118 (predicted)                               |
| 1374499_at | <i>LOC682999</i>            | ENSRNOG00000003730 | expanded<br>15k | hypothetical protein LOC682999                                 |
| 1374526_at | <i>Ankyf1_predicted</i>     | ENSRNOG00000016212 | expanded<br>15k | ankyrin repeat and FYVE domain containing 1 (predicted)        |
| 1374551_at | <i>Ifi35</i>                | ENSRNOG00000020678 | expanded<br>15k | interferon-induced protein 35                                  |
| 1374627_at | NA                          | NA                 | expanded<br>15k | NA                                                             |
| 1374718_at | <i>RGD1565144_predicted</i> | ENSRNOG00000023400 | expanded<br>15k | similar to deltex 3-like (predicted)                           |
| 1374725_at | <i>LOC310756</i>            | ENSRNOG00000012946 | expanded<br>15k | similar to Moloney leukemia virus 10                           |
| 1374730_at | <i>Tyropb</i>               | ENSRNOG00000020845 | expanded<br>15k | Tyro protein tyrosine kinase binding protein                   |
| 1374731_at | <i>Coil</i>                 | ENSRNOG00000000244 | expanded<br>15k | coilin                                                         |
| 1374838_at | <i>Sp140</i>                | ENSRNOG00000022800 | expanded<br>30k | SP140 nuclear body protein                                     |
| 1374948_at | <i>Tmem106a</i>             | ENSRNOG00000023628 | expanded<br>15k | transmembrane protein 106A                                     |
| 1375006_at | NA                          | NA                 | expanded<br>15k | NA                                                             |
| 1375010_at | <i>Cd68</i>                 | ENSRNOG00000037563 | expanded<br>15k | CD68 antigen                                                   |
| 1375211_at | <i>Rnaset2_predicted</i>    | ENSRNOG00000013190 | expanded<br>15k | ribonuclease T2 (predicted)                                    |
| 1375635_at | NA                          | NA                 | expanded<br>15k | NA                                                             |

|              |                             |                    |                 |                                                                                     |
|--------------|-----------------------------|--------------------|-----------------|-------------------------------------------------------------------------------------|
| 1375796_at   | <i>Igtp</i>                 | ENSRNOG00000027008 | expanded<br>15k | interferon gamma induced GTPase                                                     |
| 1375917_at   | <i>Gp49b</i>                | ENSRNOG00000027811 | expanded<br>30k | glycoprotein 49b                                                                    |
| 1375955_at   | <i>Zfp313</i>               | ENSRNOG00000009525 | expanded<br>15k | zinc finger protein 313                                                             |
| 1376022_at   | NA                          | NA                 | expanded<br>15k | NA                                                                                  |
| 1376029_at   | <i>Rab2l</i>                | ENSRNOG00000000474 | expanded<br>15k | RAB2, member RAS oncogene family-like                                               |
| 1376056_at   | NA                          | NA                 | expanded<br>15k | NA                                                                                  |
| 1376130_a_at | <i>Dtnb</i>                 | ENSRNOG00000011914 | expanded<br>15k | dystrobrevin, beta                                                                  |
| 1376144_at   | <i>Parp9_predicted</i>      | ENSRNOG00000023463 | expanded<br>15k | poly (ADP-ribose) polymerase family, member 9 (predicted)                           |
| 1376151_a_at | <i>RGD1564081_predicted</i> | ENSRNOG00000026821 | expanded<br>15k | similar to novel protein similar to human oligophrenin 1 (OPHN1) (predicted)        |
| 1376390_at   | <i>Ms4a11_predicted</i>     | ENSRNOG00000020991 | expanded<br>15k | membrane-spanning 4-domains, subfamily A, member 11 (predicted)                     |
| 1376652_at   | <i>C1qa</i>                 | ENSRNOG00000012807 | expanded<br>15k | complement component 1, q subcomponent, alpha polypeptide                           |
| 1376675_at   | <i>LOC501736</i>            | ENSRNOG00000024399 | expanded<br>15k | similar to CD300A antigen                                                           |
| 1376693_at   | <i>RGD1563091_predicted</i> | ENSRNOG00000039801 | expanded<br>15k | similar to OEF2 (predicted)                                                         |
| 1376835_at   | <i>Slc35b2</i>              | ENSRNOG00000019907 | expanded<br>15k | solute carrier family 35, member B2                                                 |
| 1376845_at   | <i>isg12(b)</i>             | ENSRNOG00000026605 | expanded<br>15k | putative ISG12(b) protein                                                           |
| 1376908_at   | <i>Ifit3</i>                | ENSRNOG00000022839 | expanded<br>15k | interferon-induced protein with tetratricopeptide repeats 3                         |
| 1376920_at   | <i>LOC500013</i>            | NA                 | expanded<br>15k | similar to sterile alpha motif domain containing 9-like                             |
| 1376943_at   | NA                          | NA                 | expanded<br>15k | NA                                                                                  |
| 1376960_at   | <i>RGD1310039</i>           | ENSRNOG00000015137 | expanded<br>15k | similar to hypothetical protein FLJ10058                                            |
| 1377116_at   | <i>Rnasel</i>               | ENSRNOG00000027017 | expanded<br>15k | ribonuclease L (2',5'-oligoadenylate synthetase-dependent)                          |
| 1377117_at   | NA                          | NA                 | expanded<br>30k | NA                                                                                  |
| 1377239_at   | <i>Apbb1ip</i>              | ENSRNOG00000017803 | expanded<br>15k | amyloid beta (A4) precursor protein-binding, family B, member 1 interacting protein |
| 1377497_at   | <i>Oasl1</i>                | ENSRNOG00000001187 | expanded<br>15k | 2'-5' oligoadenylate synthetase-like 1                                              |
| 1377626_at   | <i>LOC690768</i>            | NA                 | expanded<br>30k | hypothetical protein LOC690768                                                      |
| 1377671_at   | NA                          | NA                 | expanded<br>30k | NA                                                                                  |
| 1377755_at   | <i>Ascc3_predicted</i>      | ENSRNOG00000024531 | expanded<br>30k | activating signal cointegrator 1 complex subunit 3 (predicted)                      |
| 1377826_at   | NA                          | NA                 | expanded<br>30k | NA                                                                                  |
| 1377893_at   | <i>LOC690000</i>            | ENSRNOG00000014966 | expanded<br>30k | similar to CG3740-PA                                                                |
| 1377908_at   | NA                          | NA                 | expanded<br>30k | NA                                                                                  |
| 1377916_at   | <i>Slfn2_predicted</i>      | ENSRNOG00000009553 | expanded<br>30k | schlafen 2 (predicted)                                                              |
| 1377918_at   | <i>RGD1559463_predicted</i> | ENSRNOG00000008530 | expanded<br>30k | similar to Stomatin-like 1 (predicted)                                              |
| 1377943_at   | <i>Cd86</i>                 | ENSRNOG00000002289 | expanded<br>30k | cd86 antigen                                                                        |
| 1377950_at   | <i>RGD1309362</i>           | ENSRNOG00000019542 | expanded<br>30k | similar to interferon-inducible GTPase                                              |
| 1378043_at   | <i>RGD1563091_predicted</i> | ENSRNOG00000039801 | expanded<br>30k | similar to OEF2 (predicted)                                                         |
| 1378140_at   | <i>Arl11</i>                | ENSRNOG00000014653 | expanded<br>30k | ADP-ribosylation factor-like 11                                                     |
| 1378184_at   | <i>RGD1563387_predicted</i> | ENSRNOG00000002046 | expanded<br>30k | similar to antigen identified by monoclonal antibody MRC OX-2 receptor (predicted)  |
| 1378193_at   | <i>Ms4a7_predicted</i>      | ENSRNOG00000020953 | expanded<br>30k | membrane-spanning 4-domains, subfamily A, member 7 (predicted)                      |

|              |                             |                                           |                 |                                                                                                        |
|--------------|-----------------------------|-------------------------------------------|-----------------|--------------------------------------------------------------------------------------------------------|
| 1378257_at   | <i>Trex1</i>                | ENSRNOG00000020670/<br>ENSRNOG00000022540 | expanded<br>30k | three prime repair exonuclease 1                                                                       |
| 1378321_at   | <i>Rassf4</i>               | ENSRNOG00000013526                        | expanded<br>30k | Ras association (RalGDS/AF-6) domain<br>family 4                                                       |
| 1378418_at   | <i>RGD1311681</i>           | ENSRNOG00000011947                        | expanded<br>30k | similar to MGC37193 protein                                                                            |
| 1378428_at   | <i>NA</i>                   | <i>NA</i>                                 | expanded<br>30k | <i>NA</i>                                                                                              |
| 1378443_at   | <i>Slamf9_predicted</i>     | ENSRNOG00000008045                        | expanded<br>30k | SLAM family member 9 (predicted)                                                                       |
| 1378633_at   | <i>Lpxn</i>                 | ENSRNOG00000012611                        | expanded<br>30k | leupaxin                                                                                               |
| 1379223_x_at | <i>NA</i>                   | <i>NA</i>                                 | expanded<br>30k | <i>NA</i>                                                                                              |
| 1379293_at   | <i>Gzma</i>                 | ENSRNOG00000010603                        | expanded<br>30k | granzyme A                                                                                             |
| 1379316_at   | <i>NA</i>                   | <i>NA</i>                                 | expanded<br>30k | <i>NA</i>                                                                                              |
| 1379344_at   | <i>Cybb</i>                 | ENSRNOG00000003622                        | expanded<br>30k | cytochrome b-245, beta polypeptide                                                                     |
| 1379387_at   | <i>Rgs18</i>                | ENSRNOG00000003959                        | expanded<br>15k | regulator of G-protein signaling 18                                                                    |
| 1379482_at   | <i>Tm6sf1_predicted</i>     | ENSRNOG00000019662                        | expanded<br>30k | transmembrane 6 superfamily member 1<br>(predicted)                                                    |
| 1379496_at   | <i>RT1-Aw2</i>              | ENSRNOG00000000724                        | expanded<br>30k | RT1 class Ib, locus Aw2                                                                                |
| 1379538_at   | <i>Cenpj_predicted</i>      | ENSRNOG00000022597                        | expanded<br>30k | centromere protein J (predicted)                                                                       |
| 1379568_at   | <i>Ifit2</i>                | ENSRNOG00000036604                        | expanded<br>30k | interferon-induced protein with<br>tetratricopeptide repeats 2                                         |
| 1379613_at   | <i>RGD1310490_predicted</i> | ENSRNOG00000023334                        | expanded<br>30k | similar to hypothetical protein MGC29390<br>(predicted)                                                |
| 1379631_at   | <i>Csf1</i>                 | ENSRNOG00000018659                        | expanded<br>30k | colony stimulating factor 1 (macrophage)                                                               |
| 1379633_a_at | <i>Ube1l_predicted</i>      | ENSRNOG00000029195                        | expanded<br>30k | ubiquitin-activating enzyme E1-like<br>(predicted)                                                     |
| 1379634_at   | <i>Ube1l_predicted</i>      | ENSRNOG00000029195                        | expanded<br>30k | ubiquitin-activating enzyme E1-like<br>(predicted)                                                     |
| 1379698_at   | <i>NA</i>                   | <i>NA</i>                                 | expanded<br>30k | <i>NA</i>                                                                                              |
| 1379742_at   | <i>LOC363269</i>            | ENSRNOG00000022769                        | expanded<br>30k | similar to Nuclear autoantigen Sp-100<br>(Speckled 100 kDa) (Nuclear dot-<br>associated Sp100 protein) |
| 1379748_at   | <i>LOC310968</i>            | <i>NA</i>                                 | expanded<br>30k | similar to histocompatibility 28                                                                       |
| 1379760_at   | <i>Tnfrsf8</i>              | ENSRNOG00000021100                        | expanded<br>30k | tumor necrosis factor, alpha-induced<br>protein 8-like 2                                               |
| 1379766_at   | <i>Sla</i>                  | ENSRNOG00000005797                        | expanded<br>15k | src-like adaptor                                                                                       |
| 1379794_at   | <i>Gzmb</i>                 | ENSRNOG00000032868                        | expanded<br>30k | granzyme B                                                                                             |
| 1379891_at   | <i>MGC94600</i>             | ENSRNOG00000020667                        | expanded<br>30k | scotin                                                                                                 |
| 1379957_at   | <i>Slnf8</i>                | ENSRNOG00000021412                        | expanded<br>30k | schlafen 8                                                                                             |
| 1380019_at   | <i>Tcrg1</i>                | ENSRNOG00000017220                        | expanded<br>30k | T-cell, immune regulator 1                                                                             |
| 1380071_at   | <i>Parp12_predicted</i>     | ENSRNOG00000008196                        | expanded<br>30k | poly (ADP-ribose) polymerase family,<br>member 12 (predicted)                                          |
| 1380077_at   | <i>RGD1561123_predicted</i> | ENSRNOG00000036703                        | expanded<br>30k | similar to mFLJ00114 protein (predicted)                                                               |
| 1380079_at   | <i>RGD1561472_predicted</i> | <i>NA</i>                                 | expanded<br>30k | similar to mKIAA2005 protein (predicted)                                                               |
| 1380110_at   | <i>Jak2</i>                 | ENSRNOG00000015547                        | expanded<br>30k | Janus kinase 2                                                                                         |
| 1380129_at   | <i>NA</i>                   | <i>NA</i>                                 | expanded<br>15k | <i>NA</i>                                                                                              |
| 1380162_at   | <i>LOC246120</i>            | ENSRNOG00000001385                        | expanded<br>30k | RDCR-0918-3 protein                                                                                    |
| 1380297_at   | <i>NA</i>                   | <i>NA</i>                                 | expanded<br>30k | <i>NA</i>                                                                                              |
| 1380377_at   | <i>Btk</i>                  | ENSRNOG00000011331                        | expanded<br>30k | Bruton agammaglobulinemia tyrosine<br>kinase                                                           |
| 1380425_at   | <i>RnaseL</i>               | ENSRNOG00000027017                        | expanded<br>30k | ribonuclease L (2',5'-oligoadenylate<br>synthetase-dependent)                                          |

|              |                             |                    |                 |                                                                                          |
|--------------|-----------------------------|--------------------|-----------------|------------------------------------------------------------------------------------------|
| 1380474_at   | <i>Lox12_predicted</i>      | ENSRNOG00000016758 | expanded<br>30k | lysyl oxidase-like 2 (predicted)                                                         |
| 1380521_at   | <i>Hcls1</i>                | ENSRNOG00000038881 | expanded<br>30k | hematopoietic cell specific Lyn substrate 1                                              |
| 1380537_at   | <i>Nckap1l_predicted</i>    | ENSRNOG00000017989 | expanded<br>30k | NCK associated protein 1 like (predicted)                                                |
| 1380621_at   | <i>RGD1564385_predicted</i> | ENSRNOG00000011683 | expanded<br>30k | similar to tyrosine kinase Fps/Fes (predicted)                                           |
| 1380728_at   | NA                          | NA                 | expanded<br>30k | NA                                                                                       |
| 1380894_at   | <i>Lilrc1</i>               | NA                 | expanded<br>30k | leukocyte immunoglobulin-like receptor                                                   |
| 1381014_at   | <i>Ifi44</i>                | ENSRNOG00000022218 | expanded<br>30k | interferon-induced protein 44                                                            |
| 1381129_at   | NA                          | NA                 | expanded<br>30k | NA                                                                                       |
| 1381228_at   | NA                          | NA                 | expanded<br>30k | NA                                                                                       |
| 1381311_at   | <i>Emr1</i>                 | NA                 | expanded<br>30k | EGF-like module containing, mucin-like, hormone receptor-like sequence 1                 |
| 1381525_at   | <i>Enah</i>                 | ENSRNOG00000003156 | expanded<br>30k | enabled homolog (Drosophila)                                                             |
| 1381556_at   | <i>RGD1560014_predicted</i> | ENSRNOG00000014541 | expanded<br>30k | similar to hypothetical protein FLJ20035 (predicted)                                     |
| 1381875_at   | <i>Nmi</i>                  | ENSRNOG00000027502 | expanded<br>30k | N-myc (and STAT) interactor                                                              |
| 1382026_at   | <i>Arhgap9</i>              | ENSRNOG00000006946 | expanded<br>30k | Rho GTPase activating protein 9                                                          |
| 1382033_at   | <i>Klf1_predicted</i>       | ENSRNOG00000003443 | expanded<br>30k | Kruppel-like factor 1 (erythroid) (predicted)                                            |
| 1382043_at   | <i>Unc93b1</i>              | ENSRNOG00000017703 | expanded<br>30k | unc-93 homolog B1 (C. elegans)                                                           |
| 1382074_at   | <i>Ibrdc3_predicted</i>     | ENSRNOG00000000123 | expanded<br>30k | IBR domain containing 3 (predicted)                                                      |
| 1382078_at   | NA                          | NA                 | expanded<br>30k | NA                                                                                       |
| 1382106_at   | <i>Ccl6</i>                 | ENSRNOG00000030021 | expanded<br>30k | chemokine (C-C motif) ligand 6                                                           |
| 1382153_at   | <i>Clecsf6</i>              | ENSRNOG00000010045 | expanded<br>30k | C-type (calcium dependent, carbohydrate recognition domain) lectin, superfamily member 6 |
| 1382177_at   | NA                          | NA                 | expanded<br>30k | NA                                                                                       |
| 1382274_at   | <i>Rarres1</i>              | ENSRNOG00000021339 | expanded<br>30k | retinoic acid receptor responder (tazarotene induced) 1                                  |
| 1382277_at   | <i>Ly96</i>                 | ENSRNOG00000040315 | expanded<br>30k | lymphocyte antigen 96                                                                    |
| 1382314_at   | <i>G1p2_predicted</i>       | ENSRNOG00000021802 | expanded<br>30k | interferon, alpha-inducible protein (clone IFI-15K) (predicted)                          |
| 1382454_at   | <i>Cxcl9</i>                | ENSRNOG00000022242 | expanded<br>30k | chemokine (C-X-C motif) ligand 9                                                         |
| 1382531_at   | <i>Tlr7_predicted</i>       | ENSRNOG00000004249 | expanded<br>15k | toll-like receptor 7 (predicted)                                                         |
| 1382546_at   | <i>Phf11</i>                | ENSRNOG00000011580 | expanded<br>30k | PHD finger protein 11                                                                    |
| 1382601_at   | <i>RGD1564316_predicted</i> | ENSRNOG00000012779 | expanded<br>30k | similar to scavenger receptor type A SR-A (predicted)                                    |
| 1382902_at   | <i>Herc6</i>                | ENSRNOG00000023969 | expanded<br>30k | potential ubiquitin ligase                                                               |
| 1382926_s_at | <i>Pum2</i>                 | ENSRNOG00000006180 | expanded<br>30k | pumilio 2 (Drosophila)                                                                   |
| 1382950_at   | NA                          | NA                 | expanded<br>30k | NA                                                                                       |
| 1383131_at   | <i>Itgb2</i>                | ENSRNOG00000001224 | expanded<br>30k | integrin beta 2                                                                          |
| 1383189_at   | NA                          | NA                 | expanded<br>30k | NA                                                                                       |
| 1383369_at   | <i>Trim26</i>               | ENSRNOG00000000782 | expanded<br>30k | tripartite motif protein 26                                                              |
| 1383372_at   | <i>Ptafr</i>                | ENSRNOG00000013231 | expanded<br>30k | platelet-activating factor receptor                                                      |
| 1383391_a_at | C2                          | NA                 | expanded<br>30k | complement component 2                                                                   |
| 1383392_at   | C2                          | NA                 | expanded<br>30k | complement component 2                                                                   |



|              |                             |                    |                 |                                                                                                 |
|--------------|-----------------------------|--------------------|-----------------|-------------------------------------------------------------------------------------------------|
| 1383424_at   | <i>Tyki_predicted</i>       | ENSRNOG00000007690 | expanded<br>30k | thymidylate kinase family LPS-inducible member (predicted)                                      |
| 1383435_at   | <i>Scn3b</i>                | ENSRNOG00000006937 | expanded<br>30k | sodium channel, voltage-gated, type III, beta                                                   |
| 1383448_at   | <i>Isgf3g</i>               | ENSRNOG00000019478 | expanded<br>30k | interferon dependent positive acting transcription factor 3 gamma                               |
| 1383658_at   | <i>Laptm5</i>               | ENSRNOG00000011054 | expanded<br>30k | lysosomal-associated protein transmembrane 5                                                    |
| 1383662_at   | <i>LOC500956</i>            | ENSRNOG00000020580 | expanded<br>30k | hypothetical protein LOC500956                                                                  |
| 1383679_at   | <i>Rnf31_predicted</i>      | ENSRNOG00000019438 | expanded<br>30k | ring finger protein 31 (predicted)                                                              |
| 1383786_at   | <i>RGD1559997_predicted</i> | ENSRNOG00000014258 | expanded<br>30k | similar to RAB32 (predicted)                                                                    |
| 1383863_at   | <i>Lmo2</i>                 | ENSRNOG00000009401 | expanded<br>30k | LIM domain only 2                                                                               |
| 1384070_at   | <i>Gmip_predicted</i>       | ENSRNOG00000027257 | expanded<br>30k | Gem-interacting protein (predicted)                                                             |
| 1384180_at   | <i>Ifit2</i>                | ENSRNOG00000036604 | expanded<br>30k | interferon-induced protein with tetratricopeptide repeats 2                                     |
| 1384298_at   | <i>Myo1f_predicted</i>      | ENSRNOG00000008409 | expanded<br>30k | myosin IF (predicted)                                                                           |
| 1384457_at   | <i>RGD1566133_predicted</i> | ENSRNOG00000030027 | expanded<br>30k | similar to Fbxw17 protein (predicted)                                                           |
| 1384483_at   | <i>RGD1561157_predicted</i> | NA                 | expanded<br>30k | RGD1561157 (predicted)                                                                          |
| 1384765_at   | <i>Rhbdl6_predicted</i>     | ENSRNOG00000011459 | expanded<br>30k | rhomboid, veinlet-like 6 (Drosophila) (predicted)                                               |
| 1384946_at   | NA                          | NA                 | expanded<br>30k | NA                                                                                              |
| 1385001_at   | <i>Gsdmdc1_predicted</i>    | ENSRNOG00000007728 | expanded<br>30k | gasdermin domain containing 1 (predicted)                                                       |
| 1385029_at   | NA                          | NA                 | expanded<br>30k | NA                                                                                              |
| 1385051_at   | <i>Gbp4_predicted</i>       | ENSRNOG00000028768 | expanded<br>30k | guanylate nucleotide binding protein 4 (predicted)                                              |
| 1385213_at   | <i>RGD1563207_predicted</i> | ENSRNOG00000009471 | expanded<br>30k | similar to epithelial stromal interaction 1 isoform a (predicted)                               |
| 1385252_at   | <i>Trim34_predicted</i>     | ENSRNOG00000017147 | expanded<br>30k | tripartite motif protein 34 (predicted)                                                         |
| 1385276_a_at | <i>RGD1310093_predicted</i> | ENSRNOG00000018247 | expanded<br>30k | similar to hypothetical protein FLJ11354 (predicted)                                            |
| 1385277_x_at | <i>RGD1310093_predicted</i> | ENSRNOG00000018247 | expanded<br>30k | similar to hypothetical protein FLJ11354 (predicted)                                            |
| 1385439_x_at | <i>RGD1310093_predicted</i> | ENSRNOG00000018247 | expanded<br>30k | similar to hypothetical protein FLJ11354 (predicted)                                            |
| 1385440_at   | <i>Hcst</i>                 | ENSRNOG00000020849 | expanded<br>30k | hematopoietic cell signal transducer                                                            |
| 1385502_at   | <i>Trim21_predicted</i>     | ENSRNOG00000018517 | expanded<br>30k | tripartite motif protein 21 (predicted)                                                         |
| 1385557_at   | NA                          | NA                 | expanded<br>30k | NA                                                                                              |
| 1385571_at   | <i>LOC679623</i>            | NA                 | expanded<br>30k | similar to Nuclear autoantigen Sp-100 (Speckled 100 kDa) (Nuclear dot-associated Sp100 protein) |
| 1385572_at   | NA                          | NA                 | expanded<br>30k | NA                                                                                              |
| 1385658_at   | <i>Zfp313</i>               | ENSRNOG00000009525 | expanded<br>30k | zinc finger protein 313                                                                         |
| 1385696_at   | <i>RGD1561016_predicted</i> | ENSRNOG00000012965 | expanded<br>30k | similar to BC013712 protein (predicted)                                                         |
| 1385702_at   | <i>Mnda</i>                 | ENSRNOG00000003486 | expanded<br>30k | myeloid cell nuclear differentiation antigen                                                    |
| 1385832_s_at | <i>RGD1560293_predicted</i> | ENSRNOG00000004409 | expanded<br>30k | similar to RIKEN cDNA 1200013B08 (predicted)                                                    |
| 1386023_at   | <i>Lgi1</i>                 | ENSRNOG00000014758 | expanded<br>30k | leucine-rich repeat LGI family, member 1                                                        |
| 1386252_at   | NA                          | NA                 | expanded<br>30k | NA                                                                                              |
| 1386277_at   | <i>Ube1_predicted</i>       | ENSRNOG00000029195 | expanded<br>30k | ubiquitin-activating enzyme E1-like (predicted)                                                 |
| 1386893_at   | <i>Gm</i>                   | ENSRNOG00000021031 | expanded<br>15k | granulin                                                                                        |
| 1386925_at   | <i>Arpc1b</i>               | ENSRNOG00000000991 | expanded<br>15k | actin related protein 2/3 complex, subunit 1B                                                   |

|              |                        |                                           |                 |                                                                         |
|--------------|------------------------|-------------------------------------------|-----------------|-------------------------------------------------------------------------|
| 1386986_at   | <i>Ogfr</i>            | ENSRNOG00000009355                        | expanded<br>15k | opioid growth factor receptor                                           |
| 1387005_at   | <i>Ctss</i>            | ENSRNOG00000021157                        | expanded<br>15k | cathepsin S                                                             |
| 1387027_a_at | <i>Lgals9</i>          | ENSRNOG00000012681                        | expanded<br>15k | lectin, galactose binding, soluble 9                                    |
| 1387134_at   | <i>Sfln3</i>           | ENSRNOG00000021357                        | expanded<br>15k | schlafen 3                                                              |
| 1387242_at   | <i>Prkr</i>            | NA                                        | expanded<br>15k | Protein kinase, interferon-inducible double stranded RNA dependent      |
| 1387256_at   | <i>Adam1a</i>          | ENSRNOG00000001347                        | expanded<br>15k | a disintegrin and metallopeptidase domain 1a                            |
| 1387283_at   | <i>Mx2</i>             | ENSRNOG00000001963                        | expanded<br>15k | myxovirus (influenza virus) resistance 2                                |
| 1387354_at   | <i>Stat1</i>           | ENSRNOG00000014079                        | expanded<br>15k | signal transducer and activator of transcription 1                      |
| 1387687_at   | <i>Igsf6</i>           | ENSRNOG00000017277                        | expanded<br>15k | immunoglobulin superfamily, member 6                                    |
| 1387800_at   | <i>Daxx</i>            | ENSRNOG00000000477                        | expanded<br>15k | Fas death domain-associated protein                                     |
| 1387818_at   | <i>Casp4</i>           | ENSRNOG00000007372                        | expanded<br>30k | caspase 4, apoptosis-related cysteine peptidase                         |
| 1387831_at   | <i>Xcl1</i>            | ENSRNOG00000002964                        | expanded<br>30k | chemokine (C motif) ligand 1                                            |
| 1387839_at   | <i>RT1-N1</i>          | ENSRNOG00000000777/<br>ENSRNOG00000026051 | expanded<br>15k | RT1 class Ib gene, H2-TL-like, grc region (N1)                          |
| 1387956_s_at | <i>Cklf</i>            | ENSRNOG00000000576                        | expanded<br>30k | chemokine-like factor                                                   |
| 1387969_at   | <i>Cxcl10</i>          | ENSRNOG00000022256                        | expanded<br>15k | chemokine (C-X-C motif) ligand 10                                       |
| 1387984_at   | <i>Cklf</i>            | ENSRNOG00000000576                        | expanded<br>15k | chemokine-like factor                                                   |
| 1387995_a_at | <i>Ifitm3</i>          | NA                                        | expanded<br>15k | interferon induced transmembrane protein 3                              |
| 1388071_x_at | <i>RT1-Aw2</i>         | ENSRNOG00000000724                        | expanded<br>15k | RT1 class Ib, locus Aw2                                                 |
| 1388149_at   | <i>Tap1</i>            | ENSRNOG00000000457                        | expanded<br>15k | transporter 1, ATP-binding cassette, sub-family B (MDR/TAP)             |
| 1388164_at   | <i>RT1-S3</i>          | ENSRNOG00000000777/<br>ENSRNOG00000026051 | expanded<br>15k | RT1 class Ib, locus S3                                                  |
| 1388203_x_at | <i>RT1-Aw2</i>         | ENSRNOG00000000724                        | expanded<br>15k | RT1 class Ib, locus Aw2                                                 |
| 1388212_a_at | <i>RT1-S3</i>          | ENSRNOG00000000777/<br>ENSRNOG00000026051 | expanded<br>15k | RT1 class Ib, locus S3                                                  |
| 1388213_a_at | <i>RT1-S3</i>          | ENSRNOG00000000777/<br>ENSRNOG00000026051 | expanded<br>15k | RT1 class Ib, locus S3                                                  |
| 1388255_x_at | <i>RT1-Aw2</i>         | ENSRNOG00000000724                        | expanded<br>15k | RT1 class Ib, locus Aw2                                                 |
| 1388347_at   | <i>LOC362934</i>       | ENSRNOG00000007091                        | expanded<br>15k | similar to lymphocyte antigen 6 complex, locus E                        |
| 1388460_at   | <i>Capg</i>            | ENSRNOG00000013668                        | expanded<br>15k | capping protein (actin filament), gelsolin-like                         |
| 1388574_at   | <i>Wars</i>            | ENSRNOG00000004359                        | expanded<br>30k | tryptophanyl-tRNA synthetase                                            |
| 1388596_at   | <i>Cotl1_predicted</i> | ENSRNOG00000016257                        | expanded<br>15k | coactosin-like 1 ( <i>Dictyostelium</i> ) (predicted)                   |
| 1388600_at   | NA                     | NA                                        | expanded<br>15k | NA                                                                      |
| 1388673_at   | <i>Lsp1</i>            | ENSRNOG00000020300                        | expanded<br>15k | lymphocyte specific 1                                                   |
| 1388740_at   | <i>Trpt1_predicted</i> | ENSRNOG00000023023                        | expanded<br>15k | tRNA phosphotransferase 1 (predicted)                                   |
| 1388754_at   | <i>Nudt7_predicted</i> | ENSRNOG00000011976                        | expanded<br>15k | nudix (nucleoside diphosphate linked moiety X)-type motif 7 (predicted) |
| 1388776_at   | <i>MGC94600</i>        | ENSRNOG00000020667                        | expanded<br>15k | scotin                                                                  |
| 1388784_at   | <i>Csf1r</i>           | ENSRNOG00000018414                        | expanded<br>15k | colony stimulating factor 1 receptor                                    |
| 1388791_at   | <i>RGD1309930</i>      | ENSRNOG00000016012                        | expanded<br>15k | similar to 2810022L02Rik protein                                        |
| 1388880_at   | NA                     | NA                                        | expanded<br>15k | NA                                                                      |
| 1389006_at   | NA                     | NA                                        | expanded<br>15k | NA                                                                      |
| 1389034_at   | <i>Usp18</i>           | ENSRNOG00000037198                        | expanded        | ubiquitin specific peptidase 18                                         |

|            |                             |                     |                 |                                                                                                                                                       |
|------------|-----------------------------|---------------------|-----------------|-------------------------------------------------------------------------------------------------------------------------------------------------------|
| 1389123_at | <i>Ccl6</i>                 | ENSRNOG00000030021  | 15k<br>expanded | chemokine (C-C motif) ligand 6                                                                                                                        |
| 1389170_at | <i>Casp7</i>                | ENSRNOG00000016836  | 15k<br>expanded | caspace 7                                                                                                                                             |
| 1389210_at | <i>Lcp1</i>                 | ENSRNOG00000010319  | 15k<br>expanded | lymphocyte cytosolic protein 1                                                                                                                        |
| 1389347_at | <i>Pitpnm1</i>              | ENSRNOG00000018553  | 30k<br>expanded | phosphatidylinositol transfer protein, membrane-associated 1                                                                                          |
| 1389365_at | <i>LOC690000</i>            | ENSRNOG00000014966  | 15k<br>expanded | similar to CG3740-PA                                                                                                                                  |
| 1389387_at | <i>LOC682071</i>            | ENSRNOG00000009640  | 15k<br>expanded | similar to Proteasome inhibitor PI31 subunit                                                                                                          |
| 1389413_at | <i>LOC685433</i>            | ENSRNOG00000022764  | 15k<br>expanded | similar to ecotropic viral integration site 2A                                                                                                        |
| 1389553_at | <i>Dcir3</i>                | ENSRNOG00000010018  | 15k<br>expanded | dendritic cell inhibitory receptor 3                                                                                                                  |
| 1389571_at | <i>Stat2</i>                | ENSRNOG00000031081  | 15k<br>expanded | signal transducer and activator of transcription 2                                                                                                    |
| 1389659_at | <i>RGD1565540_predicted</i> | ENSRNOG00000039971  | 30k<br>expanded | similar to ctla-2-beta protein (141 AA) (predicted)                                                                                                   |
| 1389696_at | NA                          | NA                  | 15k<br>expanded | NA                                                                                                                                                    |
| 1389732_at | <i>LOC679937</i>            | ENSRNOG00000038916  | 15k<br>expanded | similar to CG4025-PA                                                                                                                                  |
| 1390022_at | <i>Arpc5</i>                | ENSRNOG00000028062  | 30k<br>expanded | actin related protein 2/3 complex, subunit 5                                                                                                          |
| 1390226_at | <i>RGD1562552_predicted</i> | NA                  | 15k<br>expanded | similar to hypothetical protein LOC340061 (predicted)                                                                                                 |
| 1390312_at | <i>RGD1561472_predicted</i> | NA                  | 15k<br>expanded | similar to mKIAA2005 protein (predicted)                                                                                                              |
| 1390348_at | <i>Folr2_predicted</i>      | ENSRNOG00000019890  | 15k<br>expanded | folate receptor 2 (fetal) (predicted)                                                                                                                 |
| 1390472_at | <i>Asah1_predicted</i>      | ENSRNOG00000002273  | 30k<br>expanded | N-acylsphingosine amidohydrolase (acid ceramidase)-like (predicted)                                                                                   |
| 1390510_at | <i>Ms4a6b</i>               | ENSRNOG00000030689  | 15k<br>expanded | membrane-spanning 4-domains, subfamily A, member 6B                                                                                                   |
| 1390529_at | <i>Cd83_predicted</i>       | ENSRNOG00000018092  | 15k<br>expanded | CD83 antigen (predicted)                                                                                                                              |
| 1390531_at | <i>RGD1306056_predicted</i> | ENSRNOG00000013267  | 15k<br>expanded | similar to Peroxisomal proliferator-activated receptor A interacting complex 285 kDa protein (PPAR-alpha interacting complex protein 285) (predicted) |
| 1390738_at | <i>Bst2</i>                 | ENSRNOG00000023370  | 15k<br>expanded | bone marrow stromal cell antigen 2                                                                                                                    |
| 1390798_at | <i>Ptprc</i>                | ENSRNOG00000000655  | 15k<br>expanded | protein tyrosine phosphatase, receptor type, C                                                                                                        |
| 1390866_at | NA                          | NA                  | 30k<br>expanded | NA                                                                                                                                                    |
| 1390909_at | NA                          | NA                  | 30k<br>expanded | NA                                                                                                                                                    |
| 1391266_at | <i>RT1-Aw2</i>              | ENSRNOG00000000724  | 30k<br>expanded | RT1 class Ib, locus Aw2                                                                                                                               |
| 1391463_at | <i>Ddx58_predicted</i>      | ENSRNOG00000006384  | 30k<br>expanded | DEAD (Asp-Glu-Ala-Asp) box polypeptide 58 (predicted)                                                                                                 |
| 1391489_at | <i>Irgm</i>                 | ENSRNOG000000031138 | 30k<br>expanded | immunity-related GTPase family, M                                                                                                                     |
| 1391593_at | <i>Rassf4</i>               | ENSRNOG00000013526  | 30k<br>expanded | Ras association (RalGDS/AF-6) domain family 4                                                                                                         |
| 1391737_at | <i>LOC500904</i>            | ENSRNOG00000006940  | 30k<br>expanded | similar to neutrophil cytosolic factor 4                                                                                                              |
| 1391979_at | NA                          | NA                  | 30k<br>expanded | NA                                                                                                                                                    |
| 1392280_at | <i>Tlr2</i>                 | ENSRNOG00000009822  | 30k<br>expanded | toll-like receptor 2                                                                                                                                  |
| 1392308_at | <i>Pla2g2d</i>              | ENSRNOG00000016826  | 30k<br>expanded | phospholipase A2, group IID                                                                                                                           |
| 1392407_at | <i>RGD1561419_predicted</i> | ENSRNOG00000004192  | 15k<br>expanded | similar to RIKEN cDNA 6030405P05 gene (predicted)                                                                                                     |
| 1392515_at | <i>LOC690097</i>            | NA                  | 30k<br>expanded | similar to immunoreceptor Ly49si3                                                                                                                     |
| 1392528_at | <i>Csf2ra</i>               | NA                  | 30k<br>expanded | granulocyte-macrophage colony stimulating receptor alpha                                                                                              |
| 1392547_at | <i>MGC105649</i>            | ENSRNOG00000029643  | 30k<br>expanded | hypothetical LOC302884                                                                                                                                |

|            |                             |                    |                 |                                                                   |
|------------|-----------------------------|--------------------|-----------------|-------------------------------------------------------------------|
| 1392628_at | NA                          | NA                 | expanded<br>30k | NA                                                                |
| 1392637_at | NA                          | NA                 | expanded<br>30k | NA                                                                |
| 1392648_at | <i>Mrc1_predicted</i>       | ENSRNOG00000018251 | expanded<br>30k | mannose receptor, C type 1 (predicted)                            |
| 1392655_at | NA                          | NA                 | expanded<br>30k | NA                                                                |
| 1392737_at | <i>Ccr5</i>                 | ENSRNOG00000006774 | expanded<br>30k | chemokine (C-C motif) receptor 5                                  |
| 1392777_at | NA                          | NA                 | expanded<br>15k | NA                                                                |
| 1392819_at | <i>Ms4a11_predicted</i>     | ENSRNOG00000020991 | expanded<br>15k | membrane-spanning 4-domains, subfamily A, member 11 (predicted)   |
| 1392840_at | NA                          | NA                 | expanded<br>30k | NA                                                                |
| 1392842_at | NA                          | NA                 | expanded<br>30k | NA                                                                |
| 1392905_at | <i>Gng2</i>                 | NA                 | expanded<br>30k | guanine nucleotide binding protein, gamma 2                       |
| 1392922_at | <i>Rap2b</i>                | ENSRNOG00000014420 | expanded<br>30k | RAP2B, member of RAS oncogene family                              |
| 1392978_at | <i>LOC688811</i>            | ENSRNOG00000016751 | expanded<br>30k | similar to solute carrier family 25, member 28                    |
| 1393038_at | <i>Fcgr1</i>                | ENSRNOG00000021199 | expanded<br>30k | Fc receptor, IgG, high affinity I                                 |
| 1393044_at | <i>Tyki_predicted</i>       | ENSRNOG00000007690 | expanded<br>30k | thymidylate kinase family LPS-inducible member (predicted)        |
| 1393085_at | <i>RGD1307700</i>           | ENSRNOG00000018467 | expanded<br>30k | similar to hypothetical protein BC018453                          |
| 1393144_at | <i>Nmi</i>                  | ENSRNOG00000027502 | expanded<br>30k | N-myc (and STAT) interactor                                       |
| 1393187_at | NA                          | NA                 | expanded<br>30k | NA                                                                |
| 1393219_at | <i>C2</i>                   | NA                 | expanded<br>30k | complement component 2                                            |
| 1393280_at | <i>Ly86_predicted</i>       | ENSRNOG00000000137 | expanded<br>15k | lymphocyte antigen 86 (predicted)                                 |
| 1393401_at | NA                          | NA                 | expanded<br>30k | NA                                                                |
| 1393682_at | <i>GPR34_predicted</i>      | ENSRNOG00000039759 | expanded<br>30k | G-protein-coupled receptor GPR34 (predicted)                      |
| 1393776_at | <i>LOC362934</i>            | ENSRNOG00000007091 | expanded<br>30k | similar to lymphocyte antigen 6 complex, locus E                  |
| 1393832_at | <i>RGD1306676</i>           | ENSRNOG00000004673 | expanded<br>30k | similar to RIKEN cDNA 0610033105                                  |
| 1393863_at | <i>Cd180_predicted</i>      | ENSRNOG00000010266 | expanded<br>30k | CD180 antigen (predicted)                                         |
| 1393885_at | <i>LOC688900</i>            | NA                 | expanded<br>30k | similar to schlafen 1                                             |
| 1393957_at | NA                          | NA                 | expanded<br>30k | NA                                                                |
| 1394340_at | <i>Inpp1</i>                | ENSRNOG00000012375 | expanded<br>30k | inositol polyphosphate-1-phosphatase                              |
| 1394352_at | <i>Ifih1</i>                | ENSRNOG00000006227 | expanded<br>30k | similar to HELICARD (predicted)                                   |
| 1394528_at | <i>Adar</i>                 | ENSRNOG00000020744 | expanded<br>30k | adenosine deaminase, RNA-specific                                 |
| 1394673_at | <i>LOC687856</i>            | ENSRNOG00000037331 | expanded<br>30k | similar to Myeloid cell surface antigen CD33 precursor (Siglec-3) |
| 1394678_at | <i>Fgd2_predicted</i>       | ENSRNOG00000000528 | expanded<br>30k | FYVE, RhoGEF and PH domain containing 2 (predicted)               |
| 1394743_at | NA                          | NA                 | expanded<br>30k | NA                                                                |
| 1395003_at | <i>Clec4a1</i>              | NA                 | expanded<br>30k | C-type lectin domain family 4, member a1                          |
| 1395034_at | <i>RGD1311481_predicted</i> | ENSRNOG00000021018 | expanded<br>30k | similar to RIKEN cDNA 4933430F08 (predicted)                      |
| 1395124_at | <i>Wars</i>                 | ENSRNOG00000004359 | expanded<br>30k | tryptophanyl-tRNA synthetase                                      |
| 1395184_at | NA                          | NA                 | expanded<br>30k | NA                                                                |
| 1395336_at | <i>RGD1309930</i>           | ENSRNOG00000016012 | expanded<br>30k | similar to 2810022L02Rik protein                                  |
| 1395665_at | NA                          | NA                 | expanded        | NA                                                                |

|              |                             |                    |                 |                                                        |
|--------------|-----------------------------|--------------------|-----------------|--------------------------------------------------------|
| 1395788_at   | NA                          | NA                 | 30k<br>expanded | NA                                                     |
| 1396671_at   | NA                          | NA                 | 30k<br>expanded | NA                                                     |
| 1396993_at   | NA                          | NA                 | 30k<br>expanded | NA                                                     |
| 1397304_at   | NA                          | NA                 | 30k<br>expanded | NA                                                     |
| 1397457_at   | NA                          | NA                 | 30k<br>expanded | NA                                                     |
| 1398027_at   | <i>RT1-Aw2</i>              | ENSRNOG00000000724 | 30k<br>expanded | RT1 class Ib, locus Aw2                                |
| 1398246_s_at | <i>Fcgr3</i>                | NA                 | 30k<br>expanded | Fc receptor, IgG, low affinity III                     |
| 1398591_at   | <i>Ccr12_predicted</i>      | ENSRNOG00000033234 | 15k<br>expanded | chemokine (C-C motif) receptor-like 2 (predicted)      |
| 1398765_at   | <i>Ap2m1</i>                | ENSRNOG00000001709 | 15k<br>expanded | adaptor-related protein complex 2, mu 1 subunit        |
| 1398925_at   | <i>RGD1307801</i>           | ENSRNOG00000000532 | 15k<br>expanded | similar to RIKEN cDNA 1300018I05                       |
| 1367918_at   | <i>Fez1</i>                 | ENSRNOG00000006075 | 15k<br>expanded | fasciculation and elongation protein zeta 1 (zygin I)  |
| 1368412_a_at | <i>Ptpro</i>                | ENSRNOG00000006231 | 15k<br>expanded | protein tyrosine phosphatase, receptor type, O         |
| 1369173_at   | <i>C3ar1</i>                | ENSRNOG00000009211 | 15k<br>expanded | complement component 3a receptor 1                     |
| 1369213_at   | <i>L1cam</i>                | ENSRNOG00000024683 | 15k<br>expanded | L1 cell adhesion molecule                              |
| 1369427_at   | <i>Mpeg1</i>                | NA                 | 15k<br>expanded | macrophage expressed gene 1                            |
| 1369743_a_at | <i>P2rx4</i>                | ENSRNOG00000001300 | 15k<br>expanded | purinergic receptor P2X, ligand-gated ion channel 4    |
| 1370161_at   | <i>Ssg1</i>                 | ENSRNOG00000002052 | 15k<br>expanded | steroid sensitive gene 1                               |
| 1370229_at   | <i>Ndrp4</i>                | ENSRNOG00000012482 | 15k<br>expanded | N-myc downstream regulated gene 4                      |
| 1370248_at   | <i>Fxyd6</i>                | ENSRNOG00000016412 | 15k<br>expanded | FXYP domain-containing ion transport regulator 6       |
| 1370389_at   | <i>Gpm6b</i>                | ENSRNOG00000004613 | 15k<br>expanded | glycoprotein m6b                                       |
| 1370442_at   | <i>Tmsb11</i>               | NA                 | 15k<br>expanded | thymosin beta-like protein 1                           |
| 1370450_at   | <i>Tpm3</i>                 | ENSRNOG00000017441 | 15k<br>expanded | tropomyosin 3, gamma                                   |
| 1370483_at   | <i>Cd244</i>                | ENSRNOG00000000045 | 15k<br>expanded | CD244 natural killer cell receptor 2B4                 |
| 1370503_s_at | <i>Epb4.1l3</i>             | ENSRNOG00000016724 | 15k<br>expanded | erythrocyte protein band 4.1-like 3                    |
| 1370892_at   | <i>C4a</i>                  | ENSRNOG00000000443 | 15k<br>expanded | complement component 4a                                |
| 1371694_at   | <i>Dpysl2</i>               | ENSRNOG00000009625 | 15k<br>expanded | dihydropyrimidinase-like 2                             |
| 1372006_at   | <i>Loxl2_predicted</i>      | ENSRNOG00000016758 | 15k<br>expanded | lysyl oxidase-like 2 (predicted)                       |
| 1372013_at   | <i>Iftm1_predicted</i>      | ENSRNOG00000004273 | 15k<br>expanded | interferon induced transmembrane protein 1 (predicted) |
| 1373028_at   | <i>Ryk</i>                  | ENSRNOG00000008593 | 15k<br>expanded | receptor-like tyrosine kinase                          |
| 1373136_at   | <i>RGD1307672</i>           | ENSRNOG00000000398 | 15k<br>expanded | hypothetical LOC294390                                 |
| 1373406_at   | <i>Tor1b</i>                | ENSRNOG00000006435 | 15k<br>expanded | torsin family 1, member B                              |
| 1373513_at   | NA                          | NA                 | 15k<br>expanded | NA                                                     |
| 1374103_at   | <i>Freq</i>                 | ENSRNOG00000008761 | 15k<br>expanded | frequenin homolog (Drosophila)                         |
| 1374106_at   | NA                          | NA                 | 15k<br>expanded | NA                                                     |
| 1374457_at   | <i>Pomt2</i>                | ENSRNOG00000012210 | 15k<br>expanded | protein-O-mannosyltransferase 2                        |
| 1374544_at   | <i>MGC112715</i>            | ENSRNOG00000000569 | 15k<br>expanded | hypothetical protein LOC690899                         |
| 1375853_at   | <i>RGD1309995_predicted</i> | ENSRNOG00000008331 | 15k<br>expanded | similar to CG13957-PA (predicted)                      |

|              |                             |                    |                 |                                                                        |
|--------------|-----------------------------|--------------------|-----------------|------------------------------------------------------------------------|
| 1376869_at   | NA                          | NA                 | expanded<br>15k | NA                                                                     |
| 1377185_at   | <i>RGD1562622_predicted</i> | ENSRNOG00000010646 | expanded<br>15k | similar to RIKEN cDNA 6330442E10 gene (predicted)                      |
| 1380822_at   | NA                          | NA                 | expanded<br>15k | NA                                                                     |
| 1383906_at   | <i>LOC316326</i>            | ENSRNOG00000015366 | expanded<br>15k | similar to lung inducible neuralized-related C3HC4 RING finger protein |
| 1387131_at   | <i>Serpini1</i>             | ENSRNOG00000010248 | expanded<br>15k | serine (or cysteine) peptidase inhibitor, clade I, member 1            |
| 1387799_at   | <i>Fxyd2</i>                | ENSRNOG00000016469 | expanded<br>15k | FXD domain-containing ion transport regulator 2                        |
| 1387883_a_at | <i>Tmsb4x</i>               | NA                 | expanded<br>15k | thymosin, beta 4                                                       |
| 1387884_at   | <i>Psm5</i>                 | ENSRNOG00000019868 | expanded<br>15k | proteasome (prosome, macropain) subunit, alpha type 5                  |
| 1387893_at   | <i>C1s</i>                  | ENSRNOG00000011971 | expanded<br>15k | complement component 1, s subcomponent                                 |
| 1388131_at   | <i>Tubb2b</i>               | ENSRNOG00000017558 | expanded<br>15k | tubulin, beta 2b                                                       |
| 1388408_at   | <i>RGD1307129</i>           | NA                 | expanded<br>15k | similar to RIKEN cDNA 1110020C13                                       |
| 1388774_at   | <i>Mbd2_predicted</i>       | NA                 | expanded<br>15k | methyl-CpG binding domain protein 2 (predicted)                        |
| 1388915_at   | NA                          | NA                 | expanded<br>15k | NA                                                                     |
| 1389477_at   | NA                          | NA                 | expanded<br>15k | NA                                                                     |
| 1389734_x_at | <i>RT1-Aw2</i>              | ENSRNOG00000000724 | expanded<br>15k | RT1 class Ib, locus Aw2                                                |
| 1390024_at   | NA                          | NA                 | expanded<br>15k | NA                                                                     |
| 1390659_at   | NA                          | NA                 | expanded<br>15k | NA                                                                     |
| 1390722_at   | NA                          | NA                 | expanded<br>15k | NA                                                                     |
| 1392794_at   | NA                          | NA                 | expanded<br>15k | NA                                                                     |
| 1398365_at   | <i>RGD1305061</i>           | ENSRNOG00000016890 | expanded<br>15k | similar to RIKEN cDNA 2700055K07                                       |
| 1398380_at   | <i>Vwa1</i>                 | ENSRNOG00000018338 | expanded<br>15k | von Willebrand factor A domain containing 1                            |
| 1398386_at   | <i>LOC501515</i>            | ENSRNOG00000016629 | expanded<br>15k | similar to Zinc finger CCHC domain-containing protein 6                |

**Supplementary Table 3:** Gene ontology enrichment of the rat iDIN. ID refers to the Gene Ontology term id, *P*-values have been computed using the standard hypergeometric test using all genes on the Affymetrix rat230 2.0 chip that are annotated to Entrez genes. Odds ratio is the observed count of genes from this GO term in the iDIN divided by the expected counts, which are also given in the table (Count, ExpCount). Size gives the total number of genes annotated to this GO term.

| GO term ID | <i>P</i> -value | OddsRatio | ExpCount | Count | Size | Term                                                                                                                      |
|------------|-----------------|-----------|----------|-------|------|---------------------------------------------------------------------------------------------------------------------------|
| GO:0002376 | 6.49E-34        | 9.62      | 11.05    | 65    | 524  | immune system process                                                                                                     |
| GO:0006955 | 7.47E-29        | 10.43     | 7.28     | 50    | 345  | immune response                                                                                                           |
| GO:0019882 | 1.65E-21        | 42.64     | 0.89     | 19    | 42   | antigen processing and presentation                                                                                       |
| GO:0006952 | 1.03E-16        | 6.70      | 7.30     | 37    | 346  | defense response                                                                                                          |
| GO:0050896 | 8.75E-15        | 3.38      | 37.02    | 83    | 1755 | response to stimulus                                                                                                      |
| GO:0048002 | 2.10E-12        | 49.02     | 0.42     | 10    | 20   | antigen processing and presentation of peptide antigen                                                                    |
| GO:0006935 | 5.55E-10        | 9.88      | 1.92     | 15    | 91   | chemotaxis                                                                                                                |
| GO:0042330 | 5.55E-10        | 9.88      | 1.92     | 15    | 91   | taxis                                                                                                                     |
| GO:0006954 | 5.60E-10        | 5.67      | 4.91     | 23    | 233  | inflammatory response                                                                                                     |
| GO:0019884 | 2.56E-09        | 56.25     | 0.27     | 7     | 13   | antigen processing and presentation of exogenous antigen                                                                  |
| GO:0002443 | 3.83E-09        | 12.09     | 1.29     | 12    | 61   | leukocyte mediated immunity                                                                                               |
| GO:0002449 | 9.61E-09        | 12.87     | 1.12     | 11    | 53   | lymphocyte mediated immunity                                                                                              |
| GO:0050776 | 1.15E-08        | 9.47      | 1.71     | 13    | 81   | regulation of immune response                                                                                             |
| GO:0002252 | 4.26E-08        | 8.36      | 1.90     | 13    | 90   | immune effector process                                                                                                   |
| GO:0050778 | 6.46E-08        | 10.38     | 1.33     | 11    | 63   | positive regulation of immune response                                                                                    |
| GO:0007626 | 8.45E-08        | 6.02      | 3.14     | 16    | 149  | locomotory behavior                                                                                                       |
| GO:0051707 | 1.04E-07        | 6.95      | 2.40     | 14    | 114  | response to other organism                                                                                                |
| GO:0048584 | 1.06E-07        | 7.65      | 2.05     | 13    | 97   | positive regulation of response to stimulus                                                                               |
| GO:0002684 | 1.36E-07        | 7.47      | 2.09     | 13    | 99   | positive regulation of immune system process                                                                              |
| GO:0016064 | 1.66E-07        | 13.26     | 0.89     | 9     | 42   | immunoglobulin mediated immune response                                                                                   |
| GO:0032020 | 1.92E-07        | Inf       | 0.08     | 4     | 4    | ISG15-protein conjugation                                                                                                 |
| GO:0048583 | 1.92E-07        | 5.63      | 3.33     | 16    | 158  | regulation of response to stimulus                                                                                        |
| GO:0019724 | 2.06E-07        | 12.87     | 0.91     | 9     | 43   | B cell mediated immunity                                                                                                  |
| GO:0002460 | 2.10E-07        | 10.61     | 1.18     | 10    | 56   | adaptive immune response based on somatic recombination of immune receptors built from immunoglobulin superfamily domains |
| GO:0002250 | 2.10E-07        | 10.61     | 1.18     | 10    | 56   | adaptive immune response                                                                                                  |
| GO:0002478 | 2.10E-07        | 79.49     | 0.17     | 5     | 8    | antigen processing and presentation of exogenous peptide antigen                                                          |
| GO:0009607 | 2.96E-07        | 5.44      | 3.44     | 16    | 163  | response to biotic stimulus                                                                                               |
| GO:0002682 | 3.01E-07        | 6.31      | 2.62     | 14    | 124  | regulation of immune system process                                                                                       |
| GO:0002526 | 3.11E-07        | 8.69      | 1.54     | 11    | 73   | acute inflammatory response                                                                                               |
| GO:0006959 | 5.61E-07        | 11.21     | 1.01     | 9     | 48   | humoral immune response                                                                                                   |
| GO:0001775 | 6.17E-07        | 5.12      | 3.63     | 16    | 172  | cell activation                                                                                                           |
| GO:0045087 | 6.74E-07        | 10.93     | 1.03     | 9     | 49   | innate immune response                                                                                                    |
| GO:0002253 | 6.74E-07        | 10.93     | 1.03     | 9     | 49   | activation of immune response                                                                                             |
| GO:0045321 | 7.17E-07        | 5.40      | 3.23     | 15    | 153  | leukocyte activation                                                                                                      |
| GO:0009615 | 9.57E-07        | 12.89     | 0.80     | 8     | 38   | response to virus                                                                                                         |

|            |          |        |       |    |     |                                                                                                                                         |
|------------|----------|--------|-------|----|-----|-----------------------------------------------------------------------------------------------------------------------------------------|
| GO:0031347 | 1.14E-06 | 10.16  | 1.10  | 9  | 52  | regulation of defense response                                                                                                          |
| GO:0009605 | 1.38E-06 | 2.88   | 12.93 | 32 | 613 | response to external stimulus                                                                                                           |
| GO:0042379 | 2.22E-06 | 14.57  | 0.63  | 7  | 31  | chemokine receptor binding                                                                                                              |
| GO:0008009 | 2.22E-06 | 14.57  | 0.63  | 7  | 31  | chemokine activity                                                                                                                      |
| GO:0002673 | 2.78E-06 | 34.05  | 0.25  | 5  | 12  | regulation of acute inflammatory response                                                                                               |
| GO:0002474 | 2.78E-06 | 34.05  | 0.25  | 5  | 12  | antigen processing and presentation of peptide antigen via MHC class I                                                                  |
| GO:0002883 | 2.78E-06 | 94.87  | 0.13  | 4  | 6   | regulation of hypersensitivity                                                                                                          |
| GO:0002864 | 2.78E-06 | 94.87  | 0.13  | 4  | 6   | regulation of acute inflammatory response to antigenic stimulus                                                                         |
| GO:0002861 | 2.78E-06 | 94.87  | 0.13  | 4  | 6   | regulation of inflammatory response to antigenic stimulus                                                                               |
| GO:0002703 | 4.44E-06 | 29.79  | 0.27  | 5  | 13  | regulation of leukocyte mediated immunity                                                                                               |
| GO:0002706 | 4.44E-06 | 29.79  | 0.27  | 5  | 13  | regulation of lymphocyte mediated immunity                                                                                              |
| GO:0051240 | 4.53E-06 | 4.91   | 3.27  | 14 | 155 | positive regulation of multicellular organismal process                                                                                 |
| GO:0002697 | 4.57E-06 | 17.96  | 0.46  | 6  | 22  | regulation of immune effector process                                                                                                   |
| GO:0009611 | 6.76E-06 | 3.19   | 8.20  | 23 | 389 | response to wounding                                                                                                                    |
| GO:0002437 | 6.78E-06 | 26.48  | 0.30  | 5  | 14  | inflammatory response to antigenic stimulus                                                                                             |
| GO:0002524 | 1.26E-05 | 47.42  | 0.17  | 4  | 8   | hypersensitivity                                                                                                                        |
| GO:0002438 | 1.26E-05 | 47.42  | 0.17  | 4  | 8   | acute inflammatory response to antigenic stimulus                                                                                       |
| GO:0002274 | 1.31E-05 | 14.36  | 0.55  | 6  | 26  | myeloid leukocyte activation                                                                                                            |
| GO:0051704 | 1.92E-05 | 3.82   | 4.72  | 16 | 224 | multi-organism process                                                                                                                  |
| GO:0006958 | 1.99E-05 | 19.85  | 0.36  | 5  | 17  | complement activation, classical pathway                                                                                                |
| GO:0002455 | 1.99E-05 | 19.85  | 0.36  | 5  | 17  | humoral immune response mediated by circulating immunoglobulin                                                                          |
| GO:0031349 | 2.08E-05 | 13.05  | 0.59  | 6  | 28  | positive regulation of defense response                                                                                                 |
| GO:0002822 | 2.22E-05 | 37.93  | 0.19  | 4  | 9   | regulation of adaptive immune response based on somatic recombination of immune receptors built from immunoglobulin superfamily domains |
| GO:0002819 | 2.22E-05 | 37.93  | 0.19  | 4  | 9   | regulation of adaptive immune response                                                                                                  |
| GO:0001816 | 3.19E-05 | 6.41   | 1.62  | 9  | 77  | cytokine production                                                                                                                     |
| GO:0002758 | 3.64E-05 | 141.53 | 0.08  | 3  | 4   | innate immune response-activating signal transduction                                                                                   |
| GO:0042535 | 3.64E-05 | 141.53 | 0.08  | 3  | 4   | positive regulation of tumor necrosis factor biosynthetic process                                                                       |
| GO:0002218 | 3.64E-05 | 141.53 | 0.08  | 3  | 4   | activation of innate immune response                                                                                                    |
| GO:0050766 | 3.64E-05 | 31.61  | 0.21  | 4  | 10  | positive regulation of phagocytosis                                                                                                     |
| GO:0019864 | 7.99E-05 | 73.52  | 0.10  | 3  | 5   | IgG binding                                                                                                                             |
| GO:0050764 | 8.30E-05 | 23.70  | 0.25  | 4  | 12  | regulation of phagocytosis                                                                                                              |
| GO:0002712 | 8.95E-05 | 70.76  | 0.11  | 3  | 5   | regulation of B cell mediated immunity                                                                                                  |



|            |          |       |       |    |      |                                                                                           |
|------------|----------|-------|-------|----|------|-------------------------------------------------------------------------------------------|
| GO:0002889 | 8.95E-05 | 70.76 | 0.11  | 3  | 5    | regulation of immunoglobulin mediated immune response                                     |
| GO:0005057 | 1.19E-04 | 4.75  | 2.35  | 10 | 116  | receptor signaling protein activity                                                       |
| GO:0007259 | 1.48E-04 | 8.69  | 0.82  | 6  | 39   | JAK-STAT cascade                                                                          |
| GO:0015198 | 1.57E-04 | 49.01 | 0.12  | 3  | 6    | oligopeptide transporter activity                                                         |
| GO:0019763 | 1.57E-04 | 49.01 | 0.12  | 3  | 6    | immunoglobulin receptor activity                                                          |
| GO:0050727 | 1.72E-04 | 8.43  | 0.84  | 6  | 40   | regulation of inflammatory response                                                       |
| GO:0019886 | 1.76E-04 | 47.17 | 0.13  | 3  | 6    | antigen processing and presentation of exogenous peptide antigen via MHC class II         |
| GO:0042116 | 1.76E-04 | 47.17 | 0.13  | 3  | 6    | macrophage activation                                                                     |
| GO:0002495 | 1.76E-04 | 47.17 | 0.13  | 3  | 6    | antigen processing and presentation of peptide antigen via MHC class II                   |
| GO:0004871 | 1.82E-04 | 1.99  | 24.05 | 42 | 1185 | signal transducer activity                                                                |
| GO:0060089 | 1.82E-04 | 1.99  | 24.05 | 42 | 1185 | molecular transducer activity                                                             |
| GO:0042221 | 2.19E-04 | 2.25  | 14.45 | 29 | 685  | response to chemical stimulus                                                             |
| GO:0031328 | 2.24E-04 | 6.46  | 1.24  | 7  | 59   | positive regulation of cellular biosynthetic process                                      |
| GO:0009891 | 2.49E-04 | 6.33  | 1.27  | 7  | 60   | positive regulation of biosynthetic process                                               |
| GO:0042742 | 2.62E-04 | 10.34 | 0.59  | 5  | 28   | defense response to bacterium                                                             |
| GO:0002541 | 2.62E-04 | 10.34 | 0.59  | 5  | 28   | activation of plasma proteins during acute inflammatory response                          |
| GO:0006956 | 2.62E-04 | 10.34 | 0.59  | 5  | 28   | complement activation                                                                     |
| GO:0030593 | 2.86E-04 | 15.79 | 0.34  | 4  | 16   | neutrophil chemotaxis                                                                     |
| GO:0042534 | 3.04E-04 | 35.37 | 0.15  | 3  | 7    | regulation of tumor necrosis factor biosynthetic process                                  |
| GO:0042533 | 3.04E-04 | 35.37 | 0.15  | 3  | 7    | tumor necrosis factor biosynthetic process                                                |
| GO:0032640 | 3.04E-04 | 35.37 | 0.15  | 3  | 7    | tumor necrosis factor production                                                          |
| GO:0006857 | 3.04E-04 | 35.37 | 0.15  | 3  | 7    | oligopeptide transport                                                                    |
| GO:0032101 | 3.38E-04 | 5.99  | 1.33  | 7  | 63   | regulation of response to external stimulus                                               |
| GO:0045807 | 3.68E-04 | 14.58 | 0.36  | 4  | 17   | positive regulation of endocytosis                                                        |
| GO:0001664 | 4.00E-04 | 4.99  | 1.79  | 8  | 88   | G-protein-coupled receptor binding                                                        |
| GO:0015197 | 4.28E-04 | 29.40 | 0.16  | 3  | 8    | peptide transporter activity                                                              |
| GO:0006911 | 4.78E-04 | 28.29 | 0.17  | 3  | 8    | phagocytosis, engulfment                                                                  |
| GO:0002708 | 4.78E-04 | 28.29 | 0.17  | 3  | 8    | positive regulation of lymphocyte mediated immunity                                       |
| GO:0002705 | 4.78E-04 | 28.29 | 0.17  | 3  | 8    | positive regulation of leukocyte mediated immunity                                        |
| GO:0002504 | 4.78E-04 | 28.29 | 0.17  | 3  | 8    | antigen processing and presentation of peptide or polysaccharide antigen via MHC class II |
| GO:0006917 | 4.97E-04 | 3.63  | 3.33  | 11 | 158  | induction of apoptosis                                                                    |
| GO:0012502 | 5.24E-04 | 3.61  | 3.35  | 11 | 159  | induction of programmed cell death                                                        |
| GO:0045429 | 7.06E-04 | 23.57 | 0.19  | 3  | 9    | positive regulation of nitric oxide biosynthetic process                                  |
| GO:0002698 | 7.06E-04 | 23.57 | 0.19  | 3  | 9    | negative regulation of immune effector process                                            |
| GO:0030097 | 7.15E-04 | 3.46  | 3.48  | 11 | 165  | hemopoiesis                                                                               |
| GO:0002757 | 8.65E-04 | 11.14 | 0.44  | 4  | 21   | immune response-activating signal transduction                                            |

|            |          |       |       |    |      |                                                            |
|------------|----------|-------|-------|----|------|------------------------------------------------------------|
| GO:0002764 | 8.65E-04 | 11.14 | 0.44  | 4  | 21   | immune response-regulating signal transduction             |
| GO:0051239 | 9.04E-04 | 2.56  | 7.23  | 17 | 343  | regulation of multicellular organismal process             |
| GO:0051173 | 9.93E-04 | 20.20 | 0.21  | 3  | 10   | positive regulation of nitrogen compound metabolic process |
| GO:0045089 | 9.93E-04 | 20.20 | 0.21  | 3  | 10   | positive regulation of innate immune response              |
| GO:0002699 | 9.93E-04 | 20.20 | 0.21  | 3  | 10   | positive regulation of immune effector process             |
| GO:0001909 | 9.93E-04 | 20.20 | 0.21  | 3  | 10   | leukocyte mediated cytotoxicity                            |
| GO:0050900 | 9.96E-04 | 7.43  | 0.78  | 5  | 37   | leukocyte migration                                        |
| GO:0007610 | 1.09E-03 | 2.60  | 6.71  | 16 | 318  | behavior                                                   |
| GO:0019865 | 1.20E-03 | 18.37 | 0.22  | 3  | 11   | immunoglobulin binding                                     |
| GO:0030693 | 1.20E-03 | 18.37 | 0.22  | 3  | 11   | caspase activity                                           |
| GO:0048534 | 1.22E-03 | 3.23  | 3.71  | 11 | 176  | hemopoietic or lymphoid organ development                  |
| GO:0042108 | 1.24E-03 | 9.97  | 0.49  | 4  | 23   | positive regulation of cytokine biosynthetic process       |
| GO:0006968 | 1.27E-03 | 6.99  | 0.82  | 5  | 39   | cellular defense response                                  |
| GO:0003779 | 1.30E-03 | 3.19  | 3.73  | 11 | 184  | actin binding                                              |
| GO:0002444 | 1.34E-03 | 17.68 | 0.23  | 3  | 11   | myeloid leukocyte mediated immunity                        |
| GO:0046649 | 1.50E-03 | 3.64  | 2.70  | 9  | 128  | lymphocyte activation                                      |
| GO:0006508 | 1.53E-03 | 2.21  | 10.36 | 21 | 491  | proteolysis                                                |
| GO:0016787 | 1.59E-03 | 1.73  | 29.19 | 45 | 1438 | hydrolase activity                                         |
| GO:0002520 | 1.67E-03 | 3.09  | 3.86  | 11 | 183  | immune system development                                  |
| GO:0006909 | 1.71E-03 | 9.01  | 0.53  | 4  | 25   | phagocytosis                                               |
| GO:0045088 | 1.76E-03 | 15.71 | 0.25  | 3  | 12   | regulation of innate immune response                       |
| GO:0030217 | 1.99E-03 | 6.25  | 0.91  | 5  | 43   | T cell differentiation                                     |
| GO:0030595 | 1.99E-03 | 8.60  | 0.55  | 4  | 26   | leukocyte chemotaxis                                       |
| GO:0005125 | 2.11E-03 | 3.19  | 3.39  | 10 | 167  | cytokine activity                                          |
| GO:0007260 | 2.26E-03 | 14.14 | 0.27  | 3  | 13   | tyrosine phosphorylation of STAT protein                   |
| GO:0045576 | 2.26E-03 | 14.14 | 0.27  | 3  | 13   | mast cell activation                                       |
| GO:0050777 | 2.26E-03 | 14.14 | 0.27  | 3  | 13   | negative regulation of immune response                     |
| GO:0045428 | 2.26E-03 | 14.14 | 0.27  | 3  | 13   | regulation of nitric oxide biosynthetic process            |
| GO:0042110 | 2.50E-03 | 4.13  | 1.86  | 7  | 88   | T cell activation                                          |
| GO:0001906 | 2.83E-03 | 12.85 | 0.30  | 3  | 14   | cell killing                                               |
| GO:0048518 | 3.00E-03 | 1.80  | 20.23 | 33 | 959  | positive regulation of biological process                  |
| GO:0002521 | 3.41E-03 | 3.89  | 1.96  | 7  | 93   | leukocyte differentiation                                  |
| GO:0042107 | 3.56E-03 | 5.39  | 1.03  | 5  | 49   | cytokine metabolic process                                 |
| GO:0042089 | 3.56E-03 | 5.39  | 1.03  | 5  | 49   | cytokine biosynthetic process                              |
| GO:0002683 | 3.86E-03 | 7.01  | 0.65  | 4  | 31   | negative regulation of immune system process               |
| GO:0009617 | 4.29E-03 | 4.26  | 1.54  | 6  | 73   | response to bacterium                                      |
| GO:0007165 | 4.82E-03 | 1.54  | 45.14 | 61 | 2140 | signal transduction                                        |
| GO:0008283 | 4.83E-03 | 1.90  | 13.69 | 24 | 649  | cell proliferation                                         |
| GO:0032103 | 4.86E-03 | 6.52  | 0.70  | 4  | 33   | positive regulation of response to external stimulus       |
| GO:0051250 | 5.05E-03 | 10.09 | 0.36  | 3  | 17   | negative regulation of lymphocyte activation               |
| GO:0030100 | 5.42E-03 | 6.30  | 0.72  | 4  | 34   | regulation of endocytosis                                  |
| GO:0046651 | 5.42E-03 | 4.84  | 1.14  | 5  | 54   | lymphocyte proliferation                                   |

|            |          |      |      |    |     |                                                   |
|------------|----------|------|------|----|-----|---------------------------------------------------|
| GO:0051050 | 5.42E-03 | 4.84 | 1.14 | 5  | 54  | positive regulation of transport                  |
| GO:0032943 | 5.42E-03 | 4.84 | 1.14 | 5  | 54  | mononuclear cell proliferation                    |
| GO:0051094 | 5.58E-03 | 2.24 | 7.19 | 15 | 341 | positive regulation of developmental process      |
| GO:0043065 | 5.95E-03 | 2.59 | 4.56 | 11 | 216 | positive regulation of apoptosis                  |
| GO:0050866 | 5.96E-03 | 9.42 | 0.38 | 3  | 18  | negative regulation of cell activation            |
| GO:0002695 | 5.96E-03 | 9.42 | 0.38 | 3  | 18  | negative regulation of leukocyte activation       |
| GO:0043068 | 6.16E-03 | 2.57 | 4.58 | 11 | 217 | positive regulation of programmed cell death      |
| GO:0018108 | 6.33E-03 | 4.65 | 1.18 | 5  | 56  | peptidyl-tyrosine phosphorylation                 |
| GO:0045727 | 6.66E-03 | 5.91 | 0.76 | 4  | 36  | positive regulation of translation                |
| GO:0050729 | 6.97E-03 | 8.83 | 0.40 | 3  | 19  | positive regulation of inflammatory response      |
| GO:0018212 | 7.34E-03 | 4.47 | 1.22 | 5  | 58  | peptidyl-tyrosine modification                    |
| GO:0004175 | 7.88E-03 | 2.28 | 6.07 | 13 | 299 | endopeptidase activity                            |
| GO:0030099 | 8.00E-03 | 3.70 | 1.75 | 6  | 83  | myeloid cell differentiation                      |
| GO:0015833 | 8.86E-03 | 5.40 | 0.82 | 4  | 39  | peptide transport                                 |
| GO:0051171 | 9.28E-03 | 7.85 | 0.44 | 3  | 21  | regulation of nitrogen compound metabolic process |
| GO:0008154 | 9.68E-03 | 5.25 | 0.84 | 4  | 40  | actin polymerization and/or depolymerization      |
| GO:0042035 | 9.68E-03 | 5.25 | 0.84 | 4  | 40  | regulation of cytokine biosynthetic process       |

**Supplementary Table 4:** Characterization of candidate genes at the rat locus controlling the iDIN.

| Location (Mb)     | Gene Symbol          | Gene name                                                | Expression <sup>†</sup> | Differential expression* | CDNA sequence variation**                                                                                                     | Cell type enrichment <sup>‡</sup> |
|-------------------|----------------------|----------------------------------------------------------|-------------------------|--------------------------|-------------------------------------------------------------------------------------------------------------------------------|-----------------------------------|
| 106.550 - 106.592 | <i>S15A1</i>         | Solute carrier family 15 member 1                        | 0                       | n/a                      | no                                                                                                                            | NS                                |
| 106.629 - 106.804 | <i>Dock9</i>         | Dedicator of cytokinesis                                 | 7.0                     | NS                       | S SNP (A/G) at 106631154                                                                                                      | NS                                |
| 107.005 - 107.125 | <i>Phgdh1</i>        | Phosphoglycerate dehydrogenase like 1                    | 7.1                     | NS                       | no                                                                                                                            | NK, $P = 5.5 \times 10^{-8}$      |
| 107.014 - 107.018 | <i>Gpr18</i>         | N-arachidonyl glycine receptor                           | 0                       | n/a                      | no                                                                                                                            | NS                                |
| 107.056 - 107.067 | <i>Gpr183 (Ebi2)</i> | Orphan GPCR                                              | 2.4                     | -1.7 fold, $P < 10^{-2}$ | SNP (A/G) at 107067871 in 5'UTR                                                                                               | DC, $P = 4.9 \times 10^{-11}$     |
| 107.145 - 107.148 | <i>Timm8a2</i>       | Translocase of inner mitochondrial membrane 8 homolog a2 | 0                       | n/a                      | no                                                                                                                            | NS                                |
| 107.228 - 107.277 | <i>Tm9sf2</i>        | Transmembrane 9 superfamily member 2                     | 8.2                     | NS                       | S SNP (A/G) at 107253621; N.S. SNP (G/T; amino acid L/F; non-pathogenic <sup>#</sup> ) at 107246348; S SNP (T/A) at 107228867 | NS                                |

<sup>†</sup> Log<sub>2</sub> of mean RNA-Seq exon coverage in the heart of the BN reference strain. Expression = 0 when <1x coverage per exon base.

\* between SHR and BN parental strains, fold change relative to BN strain

\*\* SNP alleles given as (BN/SHR), S = synonymous, N.S. = non synonymous. Sequence data from SHR sequence (TJA, personal communication) and the BN reference strain

<sup>‡</sup> Bonferroni corrected *P*-value for enrichment in both human and mouse gene expression across cell types and tissues (<http://biocps.gnf.org>). NK, natural killer cells of lymphoid origin; DC, dendritic cells of myeloid origin

# non-pathogenic – *PolyPhen* (<http://genetics.bwh.harvard.edu/pph/>). NS, not significant ( $P > 0.05$ )

**Supplementary Table 5:** Genes of the human immune response network (n=496 unique Ensembl genes). The network was constructed from the GHS sample using TFBS enrichment analysis, analogous to that performed in the rat, and expanded the by co-expression analysis (see Supplementary Information) and the same analysis was applied in the Cardiogenics sample (not shown). Probeset denotes the identifier of the probe set on the microarray Illumina v3. Type denotes whether a gene was a predicted target in GHS (target ghs), Cardiogenics (target cardio) or both (target both), or it was included by expansion of the network by correlation in GHS (expanded ghs) or GHS and Cardiogenics (expanded both). For each Illumina probe we report the assigned quality grade: “Perfect” if it perfectly and uniquely matches the target transcript; “Good” if the probe, although imperfectly matching the target transcript, is still likely to provide considerably sensitive signal; “Bad” if the probe matches repeat sequences, intergenic or intronic regions, or is unlikely to provide specific signal for any transcript; “No match” if it does not match any genomic region or transcript. We found that 92.3% of all probesets were classified as “Good” or “Perfect”. The probe quality assignments were retrieved from <http://www.compbio.group.cam.ac.uk/Resources/Annotation/> and are described in detail in Barbosa-Morais N. L., et al. A re-annotation pipeline for Illumina BeadArrays: improving the interpretation of gene expression data. *Nucleic Acids Res.* 2010, 38(3):e17. NA indicates that the Illumina probe did not have an Ensembl gene identifier (Ensembl release 54) and/or a gene symbol annotation.

| Probeset     | Ensembl ID         | Symbol        | Type          | Probe quality |
|--------------|--------------------|---------------|---------------|---------------|
| ILMN_2388547 | ENSG00000133106    | <i>EPST1</i>  | target both   | Perfect       |
| ILMN_1760062 | ENSG00000137965    | <i>IFI44</i>  | target both   | Perfect       |
| ILMN_2347798 | ENSG00000126709    | <i>IFI6</i>   | target both   | Perfect       |
| ILMN_1707695 | ENSG00000185745    | <i>IFIT1</i>  | target both   | Perfect       |
| ILMN_1699331 | ENSG00000185745    | <i>IFIT1</i>  | target both   | Bad           |
| ILMN_1739428 | ENSG00000119922    | <i>IFIT2</i>  | target both   | Perfect       |
| ILMN_2239754 | ENSG00000119917    | <i>IFIT3</i>  | target both   | Perfect       |
| ILMN_1701789 | ENSG00000119917    | <i>IFIT3</i>  | target both   | Perfect       |
| ILMN_1664543 | ENSG00000119917    | <i>IFIT3</i>  | target both   | Perfect       |
| ILMN_2054019 | ENSG00000187608    | <i>ISG15</i>  | target both   | Perfect       |
| ILMN_1736729 | ENSG00000111335    | <i>OAS2</i>   | target both   | Perfect       |
| ILMN_1709333 | ENSG00000111335    | <i>OAS2</i>   | target both   | Perfect       |
| ILMN_1674063 | ENSG00000111335    | <i>OAS2</i>   | target both   | Bad           |
| ILMN_1681721 | ENSG00000135114    | <i>OASL</i>   | target cardio | Perfect       |
| ILMN_1674811 | ENSG00000135114    | <i>OASL</i>   | target cardio | Perfect       |
| ILMN_1708672 | ENSG00000120437    | <i>ACAT2</i>  | expanded ghs  | Perfect       |
| ILMN_1749014 | ENSG00000131473    | <i>ACLY</i>   | expanded ghs  | Perfect       |
| ILMN_2344956 | ENSG00000143727    | <i>ACP1</i>   | expanded ghs  | Perfect       |
| ILMN_2370882 | ENSG00000197142    | <i>ACSL5</i>  | expanded ghs  | Perfect       |
| ILMN_2388605 | ENSG00000138071    | <i>ACTR2</i>  | expanded ghs  | Perfect       |
| ILMN_2320964 | ENSG00000160710    | <i>ADAR</i>   | expanded both | Perfect       |
| ILMN_1655935 | ENSG00000121281    | <i>ADCY7</i>  | expanded ghs  | Perfect       |
| ILMN_2129015 | ENSG00000172493    | <i>AFF1</i>   | expanded ghs  | Perfect       |
| ILMN_1767722 | ENSG00000119844    | <i>AFTPH</i>  | expanded ghs  | Perfect       |
| ILMN_1662049 | ENSG00000155189    | <i>AGPAT5</i> | expanded both | Perfect       |
| ILMN_1770454 | ENSG00000188157    | <i>AGRN</i>   | expanded ghs  | Perfect       |
| ILMN_1703538 | ENSG00000204472/// | <i>AIF1</i>   | expanded ghs  | Perfect       |
|              | ENSG00000206319/// |               |               |               |
|              | ENSG00000206428    |               |               |               |

|              |                                                             |                 |               |         |
|--------------|-------------------------------------------------------------|-----------------|---------------|---------|
| ILMN_1792473 | ENSG00000204472///<br>ENSG00000206319///<br>ENSG00000206428 | <i>AIF1</i>     | expanded ghs  | Perfect |
| ILMN_1797974 | ENSG00000146416                                             | <i>AIG1</i>     | expanded ghs  | Perfect |
| ILMN_1681301 | ENSG00000163568                                             | <i>AIM2</i>     | expanded ghs  | Perfect |
| ILMN_1709348 | ENSG00000165092                                             | <i>ALDH1A1</i>  | expanded ghs  | Perfect |
| ILMN_2078697 | NA                                                          | <i>NA</i>       | expanded ghs  | Bad     |
| ILMN_1799848 | ENSG00000152766                                             | <i>ANKRD22</i>  | expanded ghs  | Perfect |
| ILMN_2132599 | ENSG00000152766                                             | <i>ANKRD22</i>  | expanded both | Perfect |
| ILMN_1711899 | ENSG00000182718                                             | <i>ANXA2</i>    | expanded both | Perfect |
| ILMN_2399627 | ENSG00000166747                                             | <i>AP1G1</i>    | expanded ghs  | Perfect |
| ILMN_2362122 | ENSG00000185009                                             | <i>AP3M1</i>    | expanded ghs  | Perfect |
| ILMN_2412172 | ENSG00000128394                                             | <i>APOBEC3F</i> | expanded both | Perfect |
| ILMN_1702706 | ENSG00000128394                                             | <i>APOBEC3F</i> | expanded ghs  | Perfect |
| ILMN_1802106 | ENSG00000128394///<br>ENSG00000221877                       | <i>APOBEC3G</i> | expanded ghs  | Perfect |
| ILMN_2232478 | ENSG00000128394///<br>ENSG00000221877                       | <i>APOBEC3G</i> | expanded both | Perfect |
| ILMN_1756862 | NA                                                          | <i>NA</i>       | expanded both | Bad     |
| ILMN_1717154 | ENSG00000021776                                             | <i>AQR</i>      | expanded ghs  | Perfect |
| ILMN_1723884 | ENSG00000168374                                             | <i>ARF4</i>     | expanded both | Perfect |
| ILMN_1777998 | ENSG00000163219                                             | <i>ARHGAP25</i> | expanded ghs  | Perfect |
| ILMN_2408851 | ENSG00000186517                                             | <i>ARHGAP30</i> | expanded ghs  | Perfect |
| ILMN_1795247 | ENSG00000189079                                             | <i>ARID2</i>    | expanded ghs  | Perfect |
| ILMN_1781151 | ENSG00000114098                                             | <i>ARMC8</i>    | expanded both | Perfect |
| ILMN_1716026 | ENSG00000198960                                             | <i>ARMCX6</i>   | expanded ghs  | Perfect |
| ILMN_1655561 | ENSG00000111229                                             | <i>ARPC3</i>    | expanded ghs  | Perfect |
| ILMN_1712587 | ENSG00000113273                                             | <i>ARSB</i>     | expanded ghs  | Perfect |
| ILMN_2221673 | ENSG00000138381                                             | <i>ASNSD1</i>   | expanded ghs  | Perfect |
| ILMN_2374865 | ENSG00000162772                                             | <i>ATF3</i>     | expanded ghs  | Perfect |
| ILMN_1772540 | ENSG00000166454                                             | <i>ATMIN</i>    | expanded ghs  | Perfect |
| ILMN_2367753 | ENSG00000058668                                             | <i>ATP2B4</i>   | expanded ghs  | Perfect |
| ILMN_2340565 | ENSG00000017260                                             | <i>ATP2C1</i>   | expanded both | Perfect |
| ILMN_1672191 | ENSG00000116459                                             | <i>ATP5F1</i>   | expanded ghs  | Perfect |
| ILMN_1794912 | ENSG00000167863                                             | <i>ATP5H</i>    | expanded ghs  | Perfect |
| ILMN_1666372 | ENSG00000167863                                             | <i>ATP5H</i>    | expanded ghs  | Perfect |
| ILMN_1652806 | ENSG00000154723                                             | <i>ATP5J</i>    | expanded ghs  | Perfect |
| ILMN_1772929 | ENSG00000154723                                             | <i>ATP5J</i>    | expanded ghs  | Perfect |
| ILMN_2348093 | ENSG00000154723                                             | <i>ATP5J</i>    | expanded ghs  | Perfect |
| ILMN_1711102 | ENSG00000170340                                             | <i>B3GNT2</i>   | expanded both | Perfect |
| ILMN_1690241 | ENSG00000168062                                             | <i>BATF2</i>    | expanded both | Perfect |
| ILMN_1658327 | ENSG00000198604                                             | <i>BAZ1A</i>    | expanded ghs  | Perfect |
| ILMN_2372413 | ENSG00000015475                                             | <i>BID</i>      | expanded ghs  | Perfect |
| ILMN_2147920 | NA                                                          | <i>BRD7P2</i>   | expanded ghs  | Perfect |
| ILMN_1696420 | ENSG00000166164                                             | <i>BRD7</i>     | expanded ghs  | Perfect |
| ILMN_2349600 | ENSG00000112983                                             | <i>BRD8</i>     | expanded ghs  | Perfect |
| ILMN_1701711 | ENSG00000112983                                             | <i>BRD8</i>     | expanded ghs  | Perfect |
| ILMN_1770085 | ENSG00000159388                                             | <i>BTG2</i>     | expanded ghs  | Perfect |
| ILMN_2373831 | ENSG00000111801                                             | <i>BTN3A3</i>   | expanded ghs  | Perfect |
| ILMN_1749210 | ENSG00000137656                                             | <i>BUD13</i>    | expanded ghs  | Perfect |
| ILMN_1792270 | ENSG00000151893                                             | <i>C10orf46</i> | expanded both | Perfect |
| ILMN_1671905 | ENSG00000156384                                             | <i>C10orf78</i> | expanded ghs  | Perfect |
| ILMN_1786759 | ENSG00000134825                                             | <i>C11orf10</i> | expanded both | Perfect |

|              |                                                             |                     |               |         |
|--------------|-------------------------------------------------------------|---------------------|---------------|---------|
| ILMN_1773148 | ENSG00000120458                                             | <i>C11orf61</i>     | expanded ghs  | Perfect |
| ILMN_1779163 | ENSG00000087884                                             | <i>C11orf67</i>     | expanded ghs  | Perfect |
| ILMN_1758093 | ENSG00000070269                                             | <i>C14orf101</i>    | expanded ghs  | Perfect |
| ILMN_1706305 | ENSG00000133983                                             | <i>COX16</i>        | expanded ghs  | Perfect |
| ILMN_1734440 | ENSG00000151445                                             | <i>C14orf133</i>    | expanded ghs  | Perfect |
| ILMN_1661945 | ENSG00000119705                                             | <i>C14orf156</i>    | expanded ghs  | Perfect |
| ILMN_1652722 | ENSG00000156411                                             | <i>C14orf2</i>      | expanded ghs  | Perfect |
| ILMN_1702526 | ENSG00000170222                                             | <i>C17orf48</i>     | expanded ghs  | Perfect |
| ILMN_1710740 | ENSG00000166278///<br>ENSG00000204364///<br>ENSG00000206372 | <i>C2</i>           | expanded ghs  | Perfect |
| ILMN_2049727 | ENSG00000132823                                             | <i>C20orf111</i>    | expanded ghs  | Perfect |
| ILMN_1728168 | ENSG00000101166                                             | <i>SLMO2</i>        | expanded both | Perfect |
| ILMN_1787370 | ENSG00000003509                                             | <i>C2orf56</i>      | expanded both | Perfect |
| ILMN_1697742 | ENSG00000179021                                             | <i>C3orf38</i>      | expanded ghs  | Perfect |
| ILMN_1666827 | ENSG00000168538                                             | <i>C4orf41</i>      | expanded ghs  | Perfect |
| ILMN_1752086 | ENSG00000168538                                             | <i>C4orf41</i>      | expanded ghs  | Perfect |
| ILMN_1798108 | ENSG00000146476                                             | <i>C6orf211</i>     | expanded ghs  | Perfect |
| ILMN_1680867 | NA                                                          | NA                  | expanded ghs  | Bad     |
| ILMN_1659524 | ENSG00000123545                                             | <i>C6orf66</i>      | expanded ghs  | Perfect |
| ILMN_1695485 | NA                                                          | <i>C9orf109</i>     | expanded ghs  | Perfect |
| ILMN_1665004 | ENSG00000108349                                             | <i>CASC3</i>        | expanded ghs  | Perfect |
| ILMN_2325574 | ENSG00000166734                                             | <i>CASC4</i>        | expanded ghs  | Perfect |
| ILMN_2373763 | NA                                                          | NA                  | expanded ghs  | Bad     |
| ILMN_2150352 | ENSG00000172785                                             | <i>CBWD5</i>        | expanded ghs  | Perfect |
| ILMN_1745946 | ENSG00000152240                                             | <i>CCDC5</i>        | expanded ghs  | Perfect |
| ILMN_1707783 | NA                                                          | <i>LOC100130394</i> | expanded ghs  | Perfect |
| ILMN_1720048 | ENSG00000108691                                             | <i>CCL2</i>         | expanded both | Perfect |
| ILMN_1772964 | ENSG00000108700                                             | <i>CCL8</i>         | expanded both | Perfect |
| ILMN_2276996 | ENSG00000121807///<br>ENSG00000215782                       | <i>FLJ78302</i>     | expanded ghs  | Perfect |
| ILMN_1777461 | ENSG00000121807///<br>ENSG00000215782                       | <i>FLJ78302</i>     | expanded ghs  | Perfect |
| ILMN_1669062 | ENSG00000121807///<br>ENSG00000215782                       | <i>CCR2</i>         | expanded ghs  | Bad     |
| ILMN_1679382 | ENSG00000166226                                             | <i>CCT2</i>         | expanded ghs  | Perfect |
| ILMN_1722622 | ENSG00000177575                                             | <i>CD163</i>        | expanded ghs  | Perfect |
| ILMN_2413808 | ENSG00000143119                                             | <i>CD53</i>         | expanded ghs  | Perfect |
| ILMN_1662843 | ENSG00000143119                                             | <i>CD53</i>         | expanded ghs  | Perfect |
| ILMN_1675156 | ENSG00000070831                                             | <i>CDC42</i>        | expanded ghs  | Perfect |
| ILMN_1736327 | ENSG00000163171                                             | <i>CDC42EP3</i>     | expanded both | Perfect |
| ILMN_1790973 | ENSG00000101290                                             | <i>CDS2</i>         | expanded ghs  | Perfect |
| ILMN_1810977 | ENSG00000091527                                             | <i>CDV3</i>         | expanded both | Perfect |
| ILMN_1673788 | ENSG00000091527                                             | <i>CDV3</i>         | expanded ghs  | Perfect |
| ILMN_1686283 | ENSG00000093072                                             | <i>CECR1</i>        | expanded both | Perfect |
| ILMN_1766798 | ENSG00000114331                                             | <i>ACAP2</i>        | expanded ghs  | Bad     |
| ILMN_1758778 | ENSG00000119397                                             | <i>CEP110</i>       | expanded ghs  | Perfect |
| ILMN_1774287 | ENSG00000166285///<br>ENSG00000204359                       | <i>CFB</i>          | expanded both | Perfect |
| ILMN_2324375 | ENSG00000170791                                             | <i>CHCHD7</i>       | expanded ghs  | Perfect |
| ILMN_2094166 | ENSG00000086065                                             | <i>CHMP5</i>        | expanded both | Perfect |
| ILMN_1774110 | ENSG00000106069                                             | <i>CHN2</i>         | expanded ghs  | Perfect |
| ILMN_1790471 | NA                                                          | NA                  | expanded ghs  | Bad     |

|              |                 |                   |               |         |
|--------------|-----------------|-------------------|---------------|---------|
| ILMN_1671516 | ENSG00000138433 | <i>CIR</i>        | expanded ghs  | Perfect |
| ILMN_1716336 | ENSG00000175216 | <i>CKAP5</i>      | expanded ghs  | Perfect |
| ILMN_1719256 | ENSG00000173207 | <i>CKS1B</i>      | expanded ghs  | Perfect |
| ILMN_2292178 | ENSG00000172322 | <i>CLEC12A</i>    | expanded both | Perfect |
| ILMN_1711702 | NA              | <i>NA</i>         | expanded ghs  | Bad     |
| ILMN_1709204 | ENSG00000111729 | <i>CLEC4A</i>     | expanded ghs  | Perfect |
| ILMN_1704084 | NA              | <i>CMAH</i>       | expanded ghs  | Perfect |
| ILMN_1714082 | ENSG00000111726 | <i>CMAS</i>       | expanded ghs  | Perfect |
| ILMN_1783621 | ENSG00000134326 | <i>CMPK2</i>      | expanded both | Perfect |
| ILMN_1786532 | ENSG00000100528 | <i>CNIH</i>       | expanded both | Perfect |
| ILMN_1772651 | ENSG00000111596 | <i>CNOT2</i>      | expanded ghs  | Perfect |
| ILMN_1776154 | ENSG00000136152 | <i>COG3</i>       | expanded ghs  | Perfect |
| ILMN_1698621 | ENSG00000164597 | <i>COG5</i>       | expanded ghs  | Perfect |
| ILMN_1726591 | ENSG00000204397 | <i>CARD16</i>     | expanded ghs  | Perfect |
| ILMN_1701293 | ENSG00000112695 | <i>COX7A2</i>     | expanded ghs  | Good    |
| ILMN_1668582 | ENSG00000113851 | <i>CRBN</i>       | expanded ghs  | Perfect |
| ILMN_1760593 | ENSG00000008405 | <i>CRY1</i>       | expanded ghs  | Perfect |
| ILMN_1665797 | ENSG00000124207 | <i>CSE1L</i>      | expanded ghs  | Perfect |
| ILMN_1706238 | ENSG00000124207 | <i>CSE1L</i>      | expanded ghs  | Perfect |
| ILMN_1799208 | ENSG00000169826 | <i>CSGALNACT2</i> | expanded both | Perfect |
| ILMN_1785988 | ENSG00000113712 | <i>CSNK1A1</i>    | expanded both | Perfect |
| ILMN_1762002 | ENSG00000176102 | <i>CSTF3</i>      | expanded ghs  | Perfect |
| ILMN_2242463 | ENSG00000109861 | <i>CTSC</i>       | expanded ghs  | Perfect |
| ILMN_1696347 | ENSG00000109861 | <i>CTSC</i>       | expanded ghs  | Perfect |
| ILMN_1791759 | ENSG00000169245 | <i>CXCL10</i>     | expanded both | Perfect |
| ILMN_1801584 | ENSG00000121966 | <i>CXCR4</i>      | expanded both | Perfect |
| ILMN_1663751 | ENSG00000172115 | <i>CYCS</i>       | expanded ghs  | Perfect |
| ILMN_2305544 | ENSG00000155368 | <i>DBI</i>        | expanded ghs  | Perfect |
| ILMN_1755926 | ENSG00000155368 | <i>DBI</i>        | expanded ghs  | Perfect |
| ILMN_1776005 | ENSG00000198856 | <i>OSTC</i>       | expanded ghs  | Perfect |
| ILMN_1666192 | NA              | <i>NA</i>         | expanded ghs  | Bad     |
| ILMN_1744059 | ENSG00000104671 | <i>DCTN6</i>      | expanded ghs  | Good    |
| ILMN_1700628 | ENSG00000089737 | <i>DDX24</i>      | expanded ghs  | Perfect |
| ILMN_1747162 | ENSG00000213782 | <i>DDX47</i>      | expanded both | Perfect |
| ILMN_1797001 | ENSG00000107201 | <i>DDX58</i>      | expanded both | Perfect |
| ILMN_1795181 | ENSG00000137628 | <i>DDX60</i>      | expanded both | Perfect |
| ILMN_1699711 | ENSG00000158796 | <i>DEDD</i>       | expanded ghs  | Perfect |
| ILMN_2384181 | ENSG00000073737 | <i>DHRS9</i>      | expanded ghs  | Perfect |
| ILMN_1744308 | ENSG00000005100 | <i>DHX33</i>      | expanded ghs  | Perfect |
| ILMN_2325008 | NA              | <i>DHX40P</i>     | expanded ghs  | Perfect |
| ILMN_1678422 | ENSG00000108771 | <i>DHX58</i>      | expanded both | Perfect |
| ILMN_1656016 | ENSG00000135829 | <i>DHX9</i>       | expanded both | Perfect |
| ILMN_1755589 | ENSG00000066084 | <i>DIP2B</i>      | expanded ghs  | Perfect |
| ILMN_1799796 | ENSG00000083520 | <i>DIS3</i>       | expanded ghs  | Perfect |
| ILMN_1742276 | ENSG00000127993 | <i>C7orf64</i>    | expanded both | Perfect |
| ILMN_1705663 | ENSG00000104093 | <i>DMXL2</i>      | expanded both | Perfect |
| ILMN_1752455 | ENSG00000147459 | <i>DOCK5</i>      | expanded ghs  | Perfect |
| ILMN_1770048 | ENSG00000117543 | <i>DPH5</i>       | expanded ghs  | Perfect |
| ILMN_1658259 | ENSG00000185721 | <i>DRG1</i>       | expanded ghs  | Perfect |
| ILMN_1784380 | NA              | <i>NA</i>         | expanded both | Bad     |
| ILMN_2137464 | ENSG00000161202 | <i>DVL3</i>       | expanded ghs  | Perfect |
| ILMN_1773847 | ENSG00000077380 | <i>DYNC1I2</i>    | expanded both | Perfect |
| ILMN_1678766 | ENSG00000146425 | <i>DYNLT1</i>     | expanded ghs  | Perfect |



|              |                 |                  |               |         |
|--------------|-----------------|------------------|---------------|---------|
| ILMN_2374293 | ENSG00000157540 | <i>DYRK1A</i>    | expanded ghs  | Perfect |
| ILMN_1660663 | ENSG00000157540 | <i>DYRK1A</i>    | expanded both | Perfect |
| ILMN_1664560 | ENSG00000157540 | <i>DYRK1A</i>    | expanded ghs  | Perfect |
| ILMN_1653143 | ENSG00000122882 | <i>ECD</i>       | expanded ghs  | Perfect |
| ILMN_1690939 | ENSG00000025708 | <i>TYMP</i>      | expanded ghs  | Perfect |
| ILMN_1729167 | ENSG00000140598 | <i>EFTUD1</i>    | expanded ghs  | Perfect |
| ILMN_2404629 | ENSG00000140598 | <i>EFTUD1</i>    | expanded ghs  | Perfect |
| ILMN_1706502 | ENSG00000055332 | <i>EIF2AK2</i>   | expanded both | Perfect |
| ILMN_1655497 | ENSG00000063046 | <i>EIF4B</i>     | expanded ghs  | Perfect |
| ILMN_1738326 | ENSG00000135930 | <i>EIF4E2</i>    | expanded both | Perfect |
| ILMN_1796146 | ENSG00000163412 | <i>EIF4E3</i>    | expanded ghs  | Bad     |
| ILMN_2279635 | ENSG00000110321 | <i>EIF4G2</i>    | expanded both | Perfect |
| ILMN_1709747 | ENSG00000157036 | <i>EXOG</i>      | expanded ghs  | Perfect |
| ILMN_1746276 | ENSG00000120616 | <i>EPC1</i>      | expanded ghs  | Perfect |
| ILMN_1795495 | ENSG00000134899 | <i>ERCC5</i>     | expanded ghs  | Perfect |
| ILMN_1781795 | ENSG00000100632 | <i>ERH</i>       | expanded ghs  | Perfect |
| ILMN_1700671 | ENSG00000010030 | <i>ETV7</i>      | expanded ghs  | Perfect |
| ILMN_2394750 | ENSG00000131558 | <i>EXOC4</i>     | expanded both | Perfect |
| ILMN_1660840 | ENSG00000121644 | <i>PPPDE1</i>    | expanded ghs  | Perfect |
| ILMN_1669555 | ENSG00000102710 | <i>FAM48A</i>    | expanded ghs  | Perfect |
| ILMN_2378100 | ENSG00000118564 | <i>FBXL5</i>     | expanded ghs  | Perfect |
| ILMN_2123743 | ENSG00000158869 | <i>FCER1G</i>    | expanded ghs  | Perfect |
| ILMN_2261600 | ENSG00000150337 | <i>FCGR1C</i>    | expanded both | Perfect |
| ILMN_1706523 | ENSG00000143226 | <i>FCGR2A</i>    | expanded both | Perfect |
| ILMN_2370976 | ENSG00000138119 | <i>MYOF</i>      | expanded both | Perfect |
| ILMN_1797895 | ENSG00000126262 | <i>FFAR2</i>     | expanded both | Perfect |
| ILMN_1693009 | ENSG00000127951 | <i>FGL2</i>      | expanded ghs  | Perfect |
| ILMN_1768743 | ENSG00000145216 | <i>FIP1L1</i>    | expanded ghs  | Perfect |
| ILMN_1683658 | ENSG00000088832 | <i>FKBP1A</i>    | expanded both | Perfect |
| ILMN_1726930 | ENSG00000113597 | <i>C5orf44</i>   | expanded ghs  | Perfect |
| ILMN_1680644 | ENSG00000164654 | <i>MIOS</i>      | expanded ghs  | Perfect |
| ILMN_2392569 | ENSG00000171049 | <i>FPR2</i>      | expanded both | Perfect |
| ILMN_1740875 | ENSG00000171049 | <i>FPR2</i>      | expanded ghs  | Perfect |
| ILMN_2154052 | ENSG00000119537 | <i>KDSR</i>      | expanded ghs  | Perfect |
| ILMN_2151281 | ENSG00000139112 | <i>GABARAPL1</i> | expanded ghs  | Perfect |
| ILMN_1659682 | ENSG00000156958 | <i>GALK2</i>     | expanded both | Perfect |
| ILMN_1681984 | ENSG00000164574 | <i>GALNT10</i>   | expanded ghs  | Perfect |
| ILMN_1793220 | ENSG00000159131 | <i>GART</i>      | expanded both | Perfect |
| ILMN_2148785 | ENSG00000117228 | <i>GBP1</i>      | expanded both | Perfect |
| ILMN_1701114 | ENSG00000117228 | <i>GBP1</i>      | expanded ghs  | Perfect |
| ILMN_1774077 | ENSG00000162645 | <i>GBP2</i>      | expanded both | Perfect |
| ILMN_1771385 | ENSG00000162654 | <i>GBP4</i>      | expanded both | Perfect |
| ILMN_2114568 | ENSG00000154451 | <i>GBP5</i>      | expanded both | Perfect |
| ILMN_1812759 | ENSG00000131979 | <i>GCH1</i>      | expanded both | Perfect |
| ILMN_2335813 | ENSG00000131979 | <i>GCH1</i>      | expanded both | Perfect |
| ILMN_1769383 | ENSG00000196329 | <i>GIMAP5</i>    | expanded ghs  | Perfect |
| ILMN_1776678 | ENSG00000179144 | <i>GIMAP7</i>    | expanded ghs  | Perfect |
| ILMN_1760922 | ENSG00000139436 | <i>GIT2</i>      | expanded both | Perfect |
| ILMN_2355776 | ENSG00000139436 | <i>GIT2</i>      | expanded ghs  | Perfect |
| ILMN_1694323 | ENSG00000119392 | <i>GLE1</i>      | expanded both | Perfect |
| ILMN_1737308 | ENSG00000173221 | <i>GLRX</i>      | expanded ghs  | Perfect |
| ILMN_1713756 | ENSG00000148672 | <i>GLUD1</i>     | expanded ghs  | Perfect |
| ILMN_1757074 | ENSG00000059769 | <i>GNG10</i>     | expanded ghs  | Perfect |

|              |                                       |                |               |         |
|--------------|---------------------------------------|----------------|---------------|---------|
| ILMN_1671237 | ENSG00000167083                       | <i>GNGT2</i>   | expanded ghs  | Perfect |
| ILMN_2324056 | ENSG00000163938                       | <i>GNL3</i>    | expanded both | Perfect |
| ILMN_1716821 | ENSG00000114745                       | <i>GORASP1</i> | expanded both | Perfect |
| ILMN_1656818 | ENSG00000187037                       | <i>GPR141</i>  | expanded ghs  | Perfect |
| ILMN_1780368 | ENSG00000125245                       | <i>GPR18</i>   | expanded both | Perfect |
| ILMN_1737857 | ENSG00000137947                       | <i>GTF2B</i>   | expanded both | Perfect |
| ILMN_2208158 | NA                                    | <i>GTF2IP1</i> | expanded ghs  | Perfect |
| ILMN_1750658 | ENSG00000143575                       | <i>HAX1</i>    | expanded ghs  | Perfect |
| ILMN_2398903 | ENSG00000143575                       | <i>HAX1</i>    | expanded ghs  | Perfect |
| ILMN_1707236 | ENSG00000004961                       | <i>HCCS</i>    | expanded ghs  | Perfect |
| ILMN_1729749 | NA                                    | NA             | expanded both | Bad     |
| ILMN_1654639 | ENSG00000138642                       | <i>HERC6</i>   | expanded both | Perfect |
| ILMN_2374159 | ENSG00000051108                       | <i>HERPUD1</i> | expanded ghs  | Perfect |
| ILMN_2374164 | ENSG00000051108                       | <i>HERPUD1</i> | expanded ghs  | Perfect |
| ILMN_1785158 | ENSG00000122557                       | <i>HERPUD2</i> | expanded ghs  | Perfect |
| ILMN_1742929 | ENSG00000163666                       | <i>HESX1</i>   | expanded both | Perfect |
| ILMN_1763007 | ENSG00000156875                       | <i>HIAT1</i>   | expanded ghs  | Perfect |
| ILMN_1689655 | ENSG00000204287///<br>ENSG00000206243 | <i>HLA-DRA</i> | expanded ghs  | Perfect |
| ILMN_1790881 | ENSG00000150540                       | <i>HNMT</i>    | expanded ghs  | Perfect |
| ILMN_2362245 | ENSG00000126945                       | <i>HNRNPH2</i> | expanded both | Perfect |
| ILMN_1807633 | ENSG00000132541                       | <i>HRSP12</i>  | expanded ghs  | Perfect |
| ILMN_1838310 | NA                                    | NA             | expanded ghs  | Perfect |
| ILMN_1835092 | ENSG00000137959                       | <i>IFI44L</i>  | expanded ghs  | Perfect |
| ILMN_1913060 | NA                                    | NA             | expanded ghs  | Bad     |
| ILMN_1847965 | NA                                    | NA             | expanded ghs  | Perfect |
| ILMN_1840920 | NA                                    | NA             | expanded ghs  | Perfect |
| ILMN_1848843 | NA                                    | NA             | expanded ghs  | Bad     |
| ILMN_1856861 | ENSG00000114933                       | <i>INO80D</i>  | expanded ghs  | Perfect |
| ILMN_1845037 | NA                                    | NA             | expanded ghs  | Bad     |
| ILMN_1860051 | NA                                    | NA             | expanded ghs  | Bad     |
| ILMN_1822495 | NA                                    | NA             | expanded ghs  | Perfect |
| ILMN_1908488 | NA                                    | NA             | expanded ghs  | Perfect |
| ILMN_1913537 | NA                                    | NA             | expanded ghs  | Perfect |
| ILMN_1841620 | NA                                    | NA             | expanded ghs  | Perfect |
| ILMN_1910908 | NA                                    | NA             | expanded ghs  | Perfect |
| ILMN_1788017 | NA                                    | NA             | expanded both | Bad     |
| ILMN_1733956 | ENSG00000196305                       | <i>IARS</i>    | expanded ghs  | Perfect |
| ILMN_1696432 | ENSG00000138413                       | <i>IDH1</i>    | expanded ghs  | Perfect |
| ILMN_1698533 | NA                                    | NA             | expanded ghs  | Bad     |
| ILMN_1710937 | ENSG00000163565                       | <i>IFI16</i>   | expanded ghs  | Perfect |
| ILMN_2058782 | ENSG00000165949                       | <i>IFI27</i>   | expanded both | Perfect |
| ILMN_1745374 | ENSG00000068079                       | <i>IFI35</i>   | expanded both | Perfect |
| ILMN_1723912 | ENSG00000137959                       | <i>IFI44L</i>  | expanded both | Perfect |
| ILMN_1687384 | NA                                    | NA             | expanded ghs  | Bad     |
| ILMN_1696654 | NA                                    | NA             | expanded both | Bad     |
| ILMN_1801246 | ENSG00000185885                       | <i>IFITM1</i>  | expanded both | Perfect |
| ILMN_1673352 | ENSG00000185201                       | <i>IFITM2</i>  | expanded both | Perfect |
| ILMN_1805750 | ENSG00000142089                       | <i>IFITM3</i>  | expanded both | Perfect |
| ILMN_2369221 | ENSG00000164136                       | <i>IL15</i>    | expanded both | Perfect |
| ILMN_1697710 | ENSG00000125571                       | <i>IL1F7</i>   | expanded both | Perfect |
| ILMN_1689734 | ENSG00000136689                       | <i>IL1RN</i>   | expanded both | Perfect |
| ILMN_1782579 | ENSG00000132305                       | <i>IMMT</i>    | expanded ghs  | Perfect |

|              |                                       |                     |               |         |
|--------------|---------------------------------------|---------------------|---------------|---------|
| ILMN_2381603 | ENSG00000071243                       | <i>ING3</i>         | expanded both | Perfect |
| ILMN_2394561 | ENSG00000168264                       | <i>IRF2BP2</i>      | expanded ghs  | Perfect |
| ILMN_2349061 | ENSG00000185507                       | <i>IRF7</i>         | expanded both | Perfect |
| ILMN_1798181 | ENSG00000185507                       | <i>IRF7</i>         | expanded both | Perfect |
| ILMN_1659913 | ENSG00000172183                       | <i>ISG20</i>        | expanded both | Perfect |
| ILMN_1662128 | ENSG00000172780///<br>ENSG00000221812 | <i>ISY1</i>         | expanded both | Perfect |
| ILMN_1714820 | ENSG00000150093                       | <i>ITGB1</i>        | expanded both | Perfect |
| ILMN_1793384 | ENSG00000162434                       | <i>JAK1</i>         | expanded both | Perfect |
| ILMN_1683178 | ENSG00000096968                       | <i>JAK2</i>         | expanded ghs  | Perfect |
| ILMN_1697597 | ENSG00000159658                       | <i>KIAA0494</i>     | expanded ghs  | Perfect |
| ILMN_1733115 | ENSG00000170471                       | <i>KIAA1219</i>     | expanded ghs  | Perfect |
| ILMN_1674891 | ENSG00000180843                       | <i>KIAA1618</i>     | expanded ghs  | Perfect |
| ILMN_2289093 | NA                                    | NA                  | expanded both | Bad     |
| ILMN_1838885 | ENSG00000152223                       | <i>KIAA1632</i>     | expanded ghs  | Perfect |
| ILMN_1769140 | ENSG00000165185                       | <i>KIAA1958</i>     | expanded ghs  | Perfect |
| ILMN_1803254 | ENSG00000100796                       | <i>SMEK1</i>        | expanded ghs  | Perfect |
| ILMN_1811472 | ENSG00000137807                       | <i>KIF23</i>        | expanded ghs  | Perfect |
| ILMN_1683792 | ENSG00000002549                       | <i>LAP3</i>         | expanded both | Perfect |
| ILMN_1750321 | NA                                    | <i>LBA1</i>         | expanded ghs  | Perfect |
| ILMN_1768969 | ENSG00000143815                       | <i>LBR</i>          | expanded both | Perfect |
| ILMN_1658962 | ENSG00000043462                       | <i>LCP2</i>         | expanded ghs  | Perfect |
| ILMN_1801553 | ENSG00000166477                       | <i>LEO1</i>         | expanded ghs  | Perfect |
| ILMN_1782743 | ENSG00000050426                       | <i>LETMD1</i>       | expanded ghs  | Perfect |
| ILMN_1659688 | ENSG00000108679                       | <i>LOC100133842</i> | expanded both | Perfect |
| ILMN_1715760 | ENSG00000168961                       | <i>LGALS9</i>       | expanded both | Perfect |
| ILMN_1747744 | ENSG00000145685                       | <i>LHFPL2</i>       | expanded ghs  | Perfect |
| ILMN_1683678 | ENSG00000196141                       | <i>LOC26010</i>     | expanded both | Perfect |
| ILMN_1729269 | NA                                    | <i>LOC285074</i>    | expanded ghs  | Perfect |
| ILMN_1690911 | ENSG00000155330                       | <i>C16orf87</i>     | expanded ghs  | Perfect |
| ILMN_1782487 | ENSG00000117228                       | <i>GBP1</i>         | expanded ghs  | Perfect |
| ILMN_1792528 | ENSG00000118181                       | <i>RPS25</i>        | expanded ghs  | Good    |
| ILMN_1761281 | NA                                    | NA                  | expanded ghs  | Bad     |
| ILMN_1757072 | NA                                    | NA                  | expanded ghs  | Bad     |
| ILMN_1695034 | NA                                    | <i>LOC100132528</i> | expanded ghs  | Good    |
| ILMN_1813801 | NA                                    | <i>LOC643668</i>    | expanded ghs  | Perfect |
| ILMN_1721659 | ENSG00000100764                       | <i>PSMC1</i>        | expanded ghs  | Perfect |
| ILMN_1701753 | NA                                    | <i>LOC644063</i>    | expanded ghs  | Perfect |
| ILMN_1801999 | ENSG00000162825                       | <i>LOC727908</i>    | expanded ghs  | Good    |
| ILMN_1779258 | NA                                    | NA                  | expanded ghs  | Bad     |
| ILMN_1742887 | ENSG00000134248                       | <i>HBXIP</i>        | expanded ghs  | Perfect |
| ILMN_1720745 | NA                                    | <i>LOC644037</i>    | expanded ghs  | Good    |
| ILMN_1732328 | ENSG00000116251                       | <i>RPL22</i>        | expanded ghs  | Perfect |
| ILMN_1700950 | ENSG00000198856                       | <i>LOC646567</i>    | expanded ghs  | Perfect |
| ILMN_1702585 | ENSG00000119335                       | <i>LOC646817</i>    | expanded ghs  | Perfect |
| ILMN_1761922 | NA                                    | NA                  | expanded ghs  | Bad     |
| ILMN_1732313 | NA                                    | <i>LOC647195</i>    | expanded ghs  | Perfect |
| ILMN_1665736 | NA                                    | <i>LOC642784</i>    | expanded ghs  | Perfect |
| ILMN_1732074 | NA                                    | <i>LOC644037</i>    | expanded ghs  | Perfect |
| ILMN_1737574 | ENSG00000185973                       | <i>LOC648605</i>    | expanded ghs  | Perfect |
| ILMN_1726667 | NA                                    | <i>hCG_1789710</i>  | expanded ghs  | Good    |
| ILMN_1651680 | NA                                    | <i>LOC644604</i>    | expanded ghs  | Perfect |
| ILMN_1690063 | NA                                    | NA                  | expanded ghs  | Bad     |

|              |                                       |              |               |         |
|--------------|---------------------------------------|--------------|---------------|---------|
| ILMN_1718353 | NA                                    | LOC652455    | expanded ghs  | Good    |
| ILMN_1666564 | NA                                    | LOC100133788 | expanded ghs  | Perfect |
| ILMN_1708627 | ENSG00000143742///<br>ENSG00000180581 | hCG_1781062  | expanded ghs  | Perfect |
| ILMN_1790819 | ENSG00000162959                       | MEMO1        | expanded ghs  | Perfect |
| ILMN_1719344 | ENSG00000148572                       | NRBF2        | expanded ghs  | Perfect |
| ILMN_1757336 | ENSG00000186001                       | LRCH3        | expanded both | Perfect |
| ILMN_2094396 | ENSG00000171488                       | LRRC8C       | expanded ghs  | Perfect |
| ILMN_1695404 | ENSG00000160932                       | LY6E         | expanded both | Perfect |
| ILMN_1703132 | ENSG00000083099                       | LYRM2        | expanded ghs  | Perfect |
| ILMN_2084353 | ENSG00000003056                       | M6PR         | expanded both | Perfect |
| ILMN_1798454 | ENSG00000124688                       | MAD2L1BP     | expanded both | Perfect |
| ILMN_1661577 | ENSG00000182759                       | MAFA         | expanded ghs  | Perfect |
| ILMN_2215656 | ENSG00000162385                       | MAGOH        | expanded ghs  | Good    |
| ILMN_2379326 | ENSG00000135341                       | MAP3K7       | expanded both | Perfect |
| ILMN_1681101 | ENSG00000145416                       | 38776        | expanded ghs  | Perfect |
| ILMN_1673960 | ENSG00000038274                       | MAT2B        | expanded both | Perfect |
| ILMN_1806818 | ENSG00000112118                       | MCM3         | expanded ghs  | Perfect |
| ILMN_1736460 | ENSG00000111554                       | MDM1         | expanded both | Perfect |
| ILMN_1674506 | ENSG00000112282                       | MED23        | expanded ghs  | Perfect |
| ILMN_1659537 | NA                                    | NA           | expanded ghs  | Bad     |
| ILMN_1655635 | ENSG00000165819                       | METTL3       | expanded ghs  | Perfect |
| ILMN_1715863 | ENSG00000168404                       | MLKL         | expanded ghs  | Perfect |
| ILMN_1737498 | NA                                    | NA           | expanded both | Bad     |
| ILMN_1736165 | ENSG00000055609                       | MLL3         | expanded ghs  | Perfect |
| ILMN_2408877 | ENSG00000055609                       | MLL3         | expanded ghs  | Perfect |
| ILMN_1694596 | ENSG00000064763                       | FAR2         | expanded ghs  | Good    |
| ILMN_1738992 | ENSG00000163563                       | MNDA         | expanded ghs  | Perfect |
| ILMN_2274923 | ENSG00000164172                       | MOCS2        | expanded ghs  | Perfect |
| ILMN_1666156 | ENSG00000123562                       | MORF4L2      | expanded ghs  | Perfect |
| ILMN_1725700 | ENSG00000155363                       | MOV10        | expanded both | Perfect |
| ILMN_1752355 | ENSG00000197629                       | MPEG1        | expanded ghs  | Perfect |
| ILMN_1709483 | ENSG00000020922                       | MRE11A       | expanded ghs  | Perfect |
| ILMN_1663220 | ENSG00000082515                       | MRPL22       | expanded ghs  | Perfect |
| ILMN_1753016 | ENSG00000132313                       | MRPL35       | expanded ghs  | Perfect |
| ILMN_1658416 | ENSG00000163319                       | MRPS18C      | expanded ghs  | Perfect |
| ILMN_1701306 | NA                                    | NA           | expanded ghs  | Bad     |
| ILMN_1721035 | ENSG00000110077                       | MS4A6A       | expanded ghs  | Perfect |
| ILMN_2359800 | ENSG00000110077                       | MS4A6A       | expanded ghs  | Perfect |
| ILMN_1691156 | ENSG00000205362                       | MT1A         | expanded ghs  | Perfect |
| ILMN_1686664 | ENSG00000125148                       | MT2A         | expanded both | Good    |
| ILMN_2405521 | ENSG00000065911                       | MTHFD2       | expanded both | Perfect |
| ILMN_1686985 | ENSG00000171100                       | MTM1         | expanded ghs  | Perfect |
| ILMN_1662358 | ENSG00000157601                       | MX1          | expanded both | Perfect |
| ILMN_2231928 | ENSG00000183486                       | MX2          | expanded both | Perfect |
| ILMN_1688071 | ENSG00000171428                       | NAT1         | expanded ghs  | Perfect |
| ILMN_1674250 | ENSG00000123338                       | NCKAP1L      | expanded both | Perfect |
| ILMN_1784286 | ENSG00000125356                       | NDUFA1       | expanded ghs  | Perfect |
| ILMN_1760741 | ENSG00000139180                       | NDUFA9       | expanded ghs  | Perfect |
| ILMN_1776104 | ENSG00000168653                       | NDUFS5       | expanded ghs  | Perfect |
| ILMN_1785711 | ENSG00000129559                       | NEDD8        | expanded ghs  | Perfect |
| ILMN_1690325 | ENSG00000001167                       | NFYA         | expanded ghs  | Perfect |
| ILMN_1690049 | ENSG00000129460                       | NGDN         | expanded ghs  | Perfect |

|              |                 |                     |               |         |
|--------------|-----------------|---------------------|---------------|---------|
| ILMN_2324998 | ENSG00000129460 | <i>NGDN</i>         | expanded ghs  | Perfect |
| ILMN_2330994 | NA              | <i>NA</i>           | expanded ghs  | Bad     |
| ILMN_1716704 | ENSG00000140853 | <i>NLRC5</i>        | expanded both | Perfect |
| ILMN_1703153 | ENSG00000140632 | <i>N-PAC</i>        | expanded ghs  | Good    |
| ILMN_1812384 | ENSG00000113580 | <i>NR3C1</i>        | expanded ghs  | Perfect |
| ILMN_1800897 | ENSG00000078618 | <i>NRD1</i>         | expanded ghs  | Perfect |
| ILMN_1680687 | ENSG00000073969 | <i>NSF</i>          | expanded ghs  | Perfect |
| ILMN_1815723 | ENSG00000163002 | <i>NUP35</i>        | expanded ghs  | Perfect |
| ILMN_1732776 | ENSG00000110713 | <i>NUP98</i>        | expanded ghs  | Perfect |
| ILMN_2410826 | ENSG00000089127 | <i>OAS1</i>         | expanded both | Perfect |
| ILMN_1675640 | ENSG00000089127 | <i>OAS1</i>         | expanded both | Perfect |
| ILMN_2248970 | NA              | <i>NA</i>           | expanded both | Bad     |
| ILMN_2184262 | NA              | <i>NA</i>           | expanded both | Bad     |
| ILMN_1745397 | NA              | <i>NA</i>           | expanded ghs  | Bad     |
| ILMN_1715809 | ENSG00000119900 | <i>OGFRL1</i>       | expanded ghs  | Perfect |
| ILMN_1670079 | ENSG00000162600 | <i>OMA1</i>         | expanded ghs  | Perfect |
| ILMN_1784946 | ENSG00000135336 | <i>ORC3L</i>        | expanded ghs  | Perfect |
| ILMN_2328378 | ENSG00000070882 | <i>OSBPL3</i>       | expanded ghs  | Perfect |
| ILMN_1663347 | ENSG00000115155 | <i>OTOF</i>         | expanded both | Perfect |
| ILMN_1664525 | ENSG00000181631 | <i>P2RY13</i>       | expanded ghs  | Perfect |
| ILMN_1786429 | ENSG00000139679 | <i>P2RY5</i>        | expanded ghs  | Perfect |
| ILMN_1652753 | ENSG00000175575 | <i>PAAF1</i>        | expanded ghs  | Perfect |
| ILMN_1736806 | ENSG00000076641 | <i>PAG1</i>         | expanded ghs  | Perfect |
| ILMN_1767365 | ENSG00000149269 | <i>PAK1</i>         | expanded ghs  | Perfect |
| ILMN_1781819 | ENSG00000138801 | <i>PAPSS1</i>       | expanded ghs  | Perfect |
| ILMN_1710844 | ENSG00000178685 | <i>PARP10</i>       | expanded ghs  | Perfect |
| ILMN_1718558 | ENSG00000059378 | <i>PARP12</i>       | expanded both | Perfect |
| ILMN_2053527 | ENSG00000138496 | <i>PARP9</i>        | expanded both | Perfect |
| ILMN_1731224 | ENSG00000138496 | <i>PARP9</i>        | expanded ghs  | Perfect |
| ILMN_1667925 | ENSG00000115539 | <i>PDCL3</i>        | expanded ghs  | Perfect |
| ILMN_2278819 | ENSG00000205268 | <i>PDE7A</i>        | expanded ghs  | Perfect |
| ILMN_1689518 | ENSG00000198802 | <i>PECAM1</i>       | expanded ghs  | Perfect |
| ILMN_2384536 | ENSG00000198721 | <i>PECI</i>         | expanded ghs  | Perfect |
| ILMN_1679268 | ENSG00000197329 | <i>PELI1</i>        | expanded ghs  | Perfect |
| ILMN_1755536 | ENSG00000123349 | <i>PFDN5</i>        | expanded ghs  | Perfect |
| ILMN_2356284 | ENSG00000123349 | <i>PFDN5</i>        | expanded ghs  | Good    |
| ILMN_1713031 | ENSG00000104324 | <i>PGCP</i>         | expanded ghs  | Perfect |
| ILMN_1755749 | NA              | <i>LOC100132888</i> | expanded ghs  | Perfect |
| ILMN_2401769 | ENSG00000106443 | <i>PHF14</i>        | expanded ghs  | Perfect |
| ILMN_1775901 | ENSG00000100410 | <i>PHF5A</i>        | expanded ghs  | Perfect |
| ILMN_1652412 | ENSG00000102893 | <i>PHKB</i>         | expanded both | Perfect |
| ILMN_2083567 | ENSG00000040199 | <i>PHLPPL</i>       | expanded ghs  | Perfect |
| ILMN_1815134 | ENSG00000038210 | <i>PI4K2B</i>       | expanded ghs  | Perfect |
| ILMN_1780598 | ENSG00000033800 | <i>PIAS1</i>        | expanded ghs  | Perfect |
| ILMN_1778709 | ENSG00000073921 | <i>PICALM</i>       | expanded ghs  | Perfect |
| ILMN_2397571 | ENSG00000135845 | <i>PIGC</i>         | expanded ghs  | Perfect |
| ILMN_1808938 | ENSG00000151665 | <i>PIGF</i>         | expanded ghs  | Perfect |
| ILMN_1774949 | ENSG00000185808 | <i>PIGP</i>         | expanded ghs  | Perfect |
| ILMN_1769606 | ENSG00000134627 | <i>PIWIL4</i>       | expanded ghs  | Perfect |
| ILMN_2093343 | ENSG00000145287 | <i>PLAC8</i>        | expanded ghs  | Perfect |
| ILMN_1653026 | ENSG00000145287 | <i>PLAC8</i>        | expanded ghs  | Perfect |
| ILMN_1733666 | NA              | <i>NA</i>           | expanded ghs  | Bad     |
| ILMN_1749634 | ENSG00000171566 | <i>PLRG1</i>        | expanded ghs  | Perfect |

|              |                                                             |                 |               |         |
|--------------|-------------------------------------------------------------|-----------------|---------------|---------|
| ILMN_1745242 | ENSG00000188313                                             | <i>PLSCR1</i>   | expanded both | Perfect |
| ILMN_2088172 | ENSG00000047315                                             | <i>POLR2B</i>   | expanded ghs  | Perfect |
| ILMN_1791093 | ENSG00000134283                                             | <i>PPHLN1</i>   | expanded ghs  | Perfect |
| ILMN_2322842 | ENSG00000134283                                             | <i>PPHLN1</i>   | expanded both | Perfect |
| ILMN_1801913 | ENSG00000171960                                             | <i>PPIH</i>     | expanded both | Perfect |
| ILMN_2070044 | ENSG00000163644                                             | <i>PPM1K</i>    | expanded ghs  | Perfect |
| ILMN_1738784 | ENSG00000066027                                             | <i>PPP2R5A</i>  | expanded ghs  | Perfect |
| ILMN_1789283 | ENSG00000078304                                             | <i>PPP2R5C</i>  | expanded ghs  | Good    |
| ILMN_2364971 | ENSG00000078304                                             | <i>PPP2R5C</i>  | expanded both | Perfect |
| ILMN_1796962 | ENSG00000115953                                             | <i>PPP3R1</i>   | expanded ghs  | Perfect |
| ILMN_2366391 | ENSG00000117450                                             | <i>PRDX1</i>    | expanded both | Good    |
| ILMN_2395969 | ENSG00000165672                                             | <i>PRDX3</i>    | expanded ghs  | Good    |
| ILMN_2395974 | ENSG00000165672                                             | <i>PRDX3</i>    | expanded ghs  | Perfect |
| ILMN_1787509 | ENSG00000130589                                             | <i>PRIC285</i>  | expanded both | Perfect |
| ILMN_1695868 | ENSG00000124593                                             | <i>PRICKLE4</i> | expanded ghs  | Good    |
| ILMN_1751984 | ENSG00000181929                                             | <i>PRKAG1</i>   | expanded ghs  | Perfect |
| ILMN_2360415 | ENSG00000171867                                             | <i>PRNP</i>     | expanded ghs  | Perfect |
| ILMN_1715392 | ENSG00000117360                                             | <i>PRPF3</i>    | expanded ghs  | Perfect |
| ILMN_2387553 | ENSG00000100567                                             | <i>PSMA3</i>    | expanded ghs  | Perfect |
| ILMN_2318011 | ENSG00000100567                                             | <i>PSMA3</i>    | expanded ghs  | Perfect |
| ILMN_1704094 | ENSG00000100902                                             | <i>PSMA6</i>    | expanded ghs  | Perfect |
| ILMN_2376108 | ENSG00000204261///<br>ENSG00000206232///<br>ENSG00000206296 | <i>PSMB9</i>    | expanded both | Perfect |
| ILMN_1687887 | ENSG00000013275                                             | <i>PSMC4</i>    | expanded ghs  | Perfect |
| ILMN_1702837 | ENSG00000173692                                             | <i>PSMD1</i>    | expanded ghs  | Perfect |
| ILMN_1776102 | ENSG00000101843                                             | <i>PSMD10</i>   | expanded ghs  | Perfect |
| ILMN_2281128 | ENSG00000101843                                             | <i>PSMD10</i>   | expanded ghs  | Perfect |
| ILMN_2383435 | ENSG00000101843                                             | <i>PSMD10</i>   | expanded both | Perfect |
| ILMN_1786612 | ENSG00000100911                                             | <i>PSME2</i>    | expanded both | Perfect |
| ILMN_1760575 | ENSG00000112245                                             | <i>PTP4A1</i>   | expanded ghs  | Perfect |
| ILMN_2311548 | ENSG00000141378                                             | <i>PTRH2</i>    | expanded ghs  | Perfect |
| ILMN_1753196 | ENSG00000164611                                             | <i>PTTG1</i>    | expanded ghs  | Perfect |
| ILMN_1752582 | ENSG00000111540                                             | <i>RAB5B</i>    | expanded ghs  | Perfect |
| ILMN_1790354 | ENSG00000137955                                             | <i>RABGGTB</i>  | expanded ghs  | Perfect |
| ILMN_1687782 | ENSG00000152942                                             | <i>RAD17</i>    | expanded ghs  | Perfect |
| ILMN_2321634 | ENSG00000152942                                             | <i>RAD17</i>    | expanded ghs  | Perfect |
| ILMN_1806266 | ENSG00000138698                                             | <i>RAP1GDS1</i> | expanded ghs  | Perfect |
| ILMN_1725992 | ENSG00000158987                                             | <i>RAPGEF6</i>  | expanded ghs  | Perfect |
| ILMN_1701613 | ENSG00000133321                                             | <i>RARRES3</i>  | expanded both | Perfect |
| ILMN_1756999 | ENSG00000103479                                             | <i>RBL2</i>     | expanded ghs  | Perfect |
| ILMN_1673024 | ENSG00000179837                                             | <i>RBM15B</i>   | expanded ghs  | Perfect |
| ILMN_1695717 | ENSG00000089682                                             | <i>RBM41</i>    | expanded ghs  | Perfect |
| ILMN_2338480 | ENSG00000126858                                             | <i>RHOT1</i>    | expanded ghs  | Perfect |
| ILMN_1754051 | ENSG00000178966                                             | <i>RMI1</i>     | expanded ghs  | Bad     |
| ILMN_1697529 | ENSG00000022840                                             | <i>RNF10</i>    | expanded ghs  | Perfect |
| ILMN_1752526 | ENSG00000137393                                             | <i>RNF144B</i>  | expanded ghs  | Perfect |
| ILMN_1685679 | ENSG00000118518                                             | <i>RNF146</i>   | expanded ghs  | Perfect |
| ILMN_2353327 | ENSG00000137075                                             | <i>RNF38</i>    | expanded both | Perfect |
| ILMN_1688606 | ENSG00000189050                                             | <i>RNFT1</i>    | expanded both | Perfect |
| ILMN_1659255 | NA                                                          | NA              | expanded ghs  | Bad     |
| ILMN_2160388 | ENSG00000114391                                             | <i>RPL24</i>    | expanded ghs  | Good    |
| ILMN_1731546 | ENSG00000161970                                             | <i>RPL26</i>    | expanded ghs  | Good    |

|              |                 |                 |               |         |
|--------------|-----------------|-----------------|---------------|---------|
| ILMN_1754303 | ENSG00000156482 | <i>RPL30</i>    | expanded ghs  | Perfect |
| ILMN_1754195 | ENSG00000071082 | <i>RPL31</i>    | expanded ghs  | Good    |
| ILMN_1774823 | ENSG00000109475 | <i>RPL34</i>    | expanded ghs  | Perfect |
| ILMN_1756360 | ENSG00000182899 | <i>RPL35A</i>   | expanded ghs  | Good    |
| ILMN_2189936 | ENSG00000165502 | <i>RPL36AL</i>  | expanded ghs  | Perfect |
| ILMN_2189933 | ENSG00000165502 | <i>RPL36AL</i>  | expanded ghs  | Perfect |
| ILMN_1717490 | NA              | <i>RPL6P27</i>  | expanded both | Perfect |
| ILMN_1787949 | ENSG00000134419 | <i>RPS15A</i>   | expanded ghs  | Perfect |
| ILMN_2255310 | ENSG00000134419 | <i>RPS15A</i>   | expanded ghs  | Perfect |
| ILMN_2399893 | ENSG00000138326 | <i>RPS24</i>    | expanded ghs  | Perfect |
| ILMN_1746516 | ENSG00000118181 | <i>RPS25</i>    | expanded ghs  | Good    |
| ILMN_2166831 | ENSG00000198034 | <i>RPS4X</i>    | expanded ghs  | Perfect |
| ILMN_1810577 | ENSG00000198034 | <i>RPS4X</i>    | expanded ghs  | Perfect |
| ILMN_1808939 | ENSG00000137154 | <i>RPS6</i>     | expanded both | Perfect |
| ILMN_1656791 | ENSG00000137154 | <i>RPS6</i>     | expanded ghs  | Good    |
| ILMN_1806294 | ENSG00000177189 | <i>RPS6KA3</i>  | expanded both | Perfect |
| ILMN_1661000 | ENSG00000136643 | <i>RPS6KC1</i>  | expanded ghs  | Perfect |
| ILMN_1657871 | ENSG00000134321 | <i>RSAD2</i>    | expanded both | Perfect |
| ILMN_2173975 | ENSG00000136514 | <i>RTP4</i>     | expanded both | Perfect |
| ILMN_2119297 | ENSG00000020577 | <i>SAMD4A</i>   | expanded both | Perfect |
| ILMN_1814305 | NA              | NA              | expanded both | Bad     |
| ILMN_1799467 | NA              | NA              | expanded both | Bad     |
| ILMN_1700044 | ENSG00000136715 | <i>SAP130</i>   | expanded ghs  | Perfect |
| ILMN_1689842 | ENSG00000052802 | <i>SC4MOL</i>   | expanded ghs  | Perfect |
| ILMN_1701621 | ENSG00000130489 | <i>SCO2</i>     | expanded both | Perfect |
| ILMN_2363591 | ENSG00000137575 | <i>SDCBP</i>    | expanded ghs  | Perfect |
| ILMN_1772489 | ENSG00000165525 | <i>SDCCAG1</i>  | expanded ghs  | Perfect |
| ILMN_1732575 | ENSG00000129657 | <i>SEC14L1</i>  | expanded ghs  | Perfect |
| ILMN_1708619 | ENSG00000085415 | <i>SEH1L</i>    | expanded ghs  | Perfect |
| ILMN_2134110 | ENSG00000113811 | <i>SELK</i>     | expanded ghs  | Good    |
| ILMN_1724422 | ENSG00000188404 | <i>SELL</i>     | expanded ghs  | Perfect |
| ILMN_1801121 | ENSG00000163904 | <i>SEN2</i>     | expanded ghs  | Perfect |
| ILMN_2123567 | ENSG00000163904 | <i>SEN2</i>     | expanded ghs  | Perfect |
| ILMN_2338452 | ENSG00000197249 | <i>SERPINA1</i> | expanded ghs  | Perfect |
| ILMN_1670305 | ENSG00000149131 | <i>SERPING1</i> | expanded both | Perfect |
| ILMN_1724495 | ENSG00000187231 | <i>SESTD1</i>   | expanded ghs  | Perfect |
| ILMN_1703720 | ENSG00000115128 | <i>SF3B14</i>   | expanded ghs  | Perfect |
| ILMN_2391750 | ENSG00000163935 | <i>SFMBT1</i>   | expanded ghs  | Perfect |
| ILMN_2069593 | ENSG00000139218 | <i>SFRS2IP</i>  | expanded ghs  | Perfect |
| ILMN_2128128 | ENSG00000127922 | <i>SHFM1</i>    | expanded ghs  | Good    |
| ILMN_1794505 | ENSG00000127922 | <i>SHFM1</i>    | expanded ghs  | Perfect |
| ILMN_1725320 | ENSG00000088827 | <i>SIGLEC1</i>  | expanded both | Perfect |
| ILMN_2344007 | ENSG00000092208 | <i>SIP1</i>     | expanded ghs  | Good    |
| ILMN_1672662 | ENSG00000144136 | <i>SLC20A1</i>  | expanded ghs  | Perfect |
| ILMN_1752639 | ENSG00000085491 | <i>SLC25A24</i> | expanded both | Perfect |
| ILMN_1742705 | ENSG00000133195 | <i>SLC39A11</i> | expanded ghs  | Perfect |
| ILMN_1682738 | ENSG00000166949 | <i>SMAD3</i>    | expanded ghs  | Perfect |
| ILMN_1768271 | ENSG00000112305 | <i>SMAP1</i>    | expanded ghs  | Perfect |
| ILMN_1808148 | NA              | NA              | expanded ghs  | Bad     |
| ILMN_1687519 | ENSG00000092531 | <i>SNAP23</i>   | expanded both | Perfect |
| ILMN_2365479 | ENSG00000028528 | <i>SNX1</i>     | expanded ghs  | Perfect |
| ILMN_2365484 | ENSG00000028528 | <i>SNX1</i>     | expanded ghs  | Bad     |
| ILMN_1738491 | ENSG00000148158 | <i>SNX30</i>    | expanded ghs  | Perfect |

|              |                                       |           |               |         |
|--------------|---------------------------------------|-----------|---------------|---------|
| ILMN_1709772 | ENSG00000089006                       | SNX5      | expanded ghs  | Perfect |
| ILMN_1685327 | ENSG00000159140                       | SON       | expanded ghs  | Perfect |
| ILMN_1703427 | ENSG00000159140                       | SON       | expanded both | Perfect |
| ILMN_1767135 | ENSG00000115904                       | SOS1      | expanded ghs  | Perfect |
| ILMN_1764414 | ENSG00000100485                       | SOS2      | expanded ghs  | Perfect |
| ILMN_1813455 | ENSG00000135899                       | SP110     | expanded both | Perfect |
| ILMN_1703263 | ENSG00000079263                       | SP140     | expanded both | Perfect |
| ILMN_1778599 | NA                                    | NA        | expanded both | Bad     |
| ILMN_2246882 | ENSG00000079263                       | SP140     | expanded both | Perfect |
| ILMN_1657423 | ENSG00000090487                       | SPG21     | expanded both | Perfect |
| ILMN_1704290 | ENSG00000100596                       | SPTLC2    | expanded both | Perfect |
| ILMN_2286334 | ENSG00000163714                       | SR140     | expanded ghs  | Perfect |
| ILMN_2169152 | ENSG00000122862                       | SRGN      | expanded ghs  | Perfect |
| ILMN_1760347 | ENSG00000122862                       | SRGN      | expanded ghs  | Perfect |
| ILMN_1759883 | ENSG00000143742///<br>ENSG00000180581 | SRP9      | expanded ghs  | Good    |
| ILMN_1783226 | ENSG00000163479                       | SSR2      | expanded ghs  | Perfect |
| ILMN_1690105 | ENSG00000115415                       | STAT1     | expanded both | Perfect |
| ILMN_1691364 | ENSG00000115415                       | STAT1     | expanded both | Perfect |
| ILMN_1777325 | ENSG00000115415                       | STAT1     | expanded both | Perfect |
| ILMN_2152581 | ENSG00000112079                       | STK38     | expanded ghs  | Perfect |
| ILMN_1696419 | ENSG00000148175                       | STOM      | expanded both | Perfect |
| ILMN_1746090 | ENSG00000134910                       | STT3A     | expanded ghs  | Perfect |
| ILMN_1752895 | ENSG00000170310                       | STX8      | expanded ghs  | Perfect |
| ILMN_2333594 | ENSG00000184900                       | SUMO2     | expanded both | Perfect |
| ILMN_1781516 | ENSG00000092201                       | SUPT16H   | expanded ghs  | Perfect |
| ILMN_1756590 | NA                                    | NA        | expanded ghs  | Bad     |
| ILMN_1653367 | ENSG00000120656                       | TAF12     | expanded ghs  | Perfect |
| ILMN_1694888 | ENSG00000064313                       | TAF2      | expanded ghs  | Perfect |
| ILMN_1777565 | NA                                    | NA        | expanded ghs  | Bad     |
| ILMN_1734138 | ENSG00000157014                       | TATDN2    | expanded ghs  | Perfect |
| ILMN_1744316 | ENSG00000203705                       | TATDN3    | expanded both | Perfect |
| ILMN_2374770 | ENSG00000106052                       | TAX1BP1   | expanded ghs  | Perfect |
| ILMN_2402272 | ENSG00000180964                       | TCEAL8    | expanded ghs  | Perfect |
| ILMN_1726245 | ENSG00000163513                       | TGFBP2    | expanded ghs  | Perfect |
| ILMN_1740345 | ENSG00000151500                       | THYN1     | expanded ghs  | Perfect |
| ILMN_2334042 | ENSG00000151500                       | THYN1     | expanded ghs  | Perfect |
| ILMN_1712634 | ENSG00000116001                       | TIA1      | expanded ghs  | Perfect |
| ILMN_1717745 | ENSG00000151923                       | TIAL1     | expanded ghs  | Perfect |
| ILMN_1796855 | ENSG00000151923                       | TIAL1     | expanded ghs  | Perfect |
| ILMN_1654560 | ENSG00000174125                       | TLR1      | expanded ghs  | Perfect |
| ILMN_1705047 | ENSG00000101916                       | TLR8      | expanded ghs  | Perfect |
| ILMN_1724139 | ENSG00000152558                       | TMEM123   | expanded both | Perfect |
| ILMN_1683575 | ENSG00000185973                       | LOC648605 | expanded ghs  | Perfect |
| ILMN_1768816 | ENSG00000120802                       | TMPO      | expanded both | Perfect |
| ILMN_1801307 | ENSG00000121858                       | TNFSF10   | expanded both | Perfect |
| ILMN_1768181 | ENSG00000186283                       | TOR3A     | expanded ghs  | Perfect |
| ILMN_1764851 | NA                                    | NA        | expanded ghs  | Bad     |
| ILMN_2392143 | ENSG00000175104                       | TRAF6     | expanded ghs  | Perfect |
| ILMN_1758250 | ENSG00000135148                       | TRAFD1    | expanded ghs  | Perfect |
| ILMN_1779252 | NA                                    | NA        | expanded both | Bad     |



|              |                                                             |                  |               |         |
|--------------|-------------------------------------------------------------|------------------|---------------|---------|
| ILMN_1738704 | ENSG00000137313///<br>ENSG00000206421///<br>ENSG00000206499 | <i>TRIM26</i>    | expanded ghs  | Perfect |
| ILMN_1704383 | ENSG00000108395                                             | <i>TRIM37</i>    | expanded ghs  | Perfect |
| ILMN_2413517 | ENSG00000204599///<br>ENSG00000206419///<br>ENSG00000206495 | <i>TRIM39</i>    | expanded ghs  | Perfect |
| ILMN_1796063 | ENSG00000166326                                             | <i>TRIM44</i>    | expanded ghs  | Perfect |
| ILMN_1704972 | ENSG00000132256                                             | <i>TRIM5</i>     | expanded both | Perfect |
| ILMN_1737599 | ENSG00000132256                                             | <i>TRIM5</i>     | expanded ghs  | Perfect |
| ILMN_2404665 | ENSG00000132256                                             | <i>TRIM5</i>     | expanded both | Perfect |
| ILMN_1805481 | ENSG00000066651                                             | <i>TRMT11</i>    | expanded ghs  | Perfect |
| ILMN_1713668 | ENSG00000116918                                             | <i>TSNAX</i>     | expanded ghs  | Perfect |
| ILMN_2038776 | ENSG00000136810                                             | <i>TXN</i>       | expanded ghs  | Perfect |
| ILMN_1680314 | ENSG00000136810                                             | <i>TXN</i>       | expanded ghs  | Perfect |
| ILMN_1783753 | ENSG00000117862                                             | <i>TXNDC12</i>   | expanded both | Perfect |
| ILMN_1772156 | ENSG00000023318                                             | <i>ERP44</i>     | expanded ghs  | Perfect |
| ILMN_2324157 | ENSG00000144744                                             | <i>UBA3</i>      | expanded both | Perfect |
| ILMN_1703108 | ENSG00000156587                                             | <i>UBE2L6</i>    | expanded both | Perfect |
| ILMN_1692168 | ENSG00000159202                                             | <i>UBE2Z</i>     | expanded ghs  | Perfect |
| ILMN_1798380 | ENSG00000135018                                             | <i>UBQLN1</i>    | expanded ghs  | Perfect |
| ILMN_1795964 | ENSG00000159459                                             | <i>UBR1</i>      | expanded both | Perfect |
| ILMN_2110281 | ENSG00000143222                                             | <i>UFC1</i>      | expanded ghs  | Perfect |
| ILMN_1737705 | ENSG00000111647                                             | <i>UHRF1BP1L</i> | expanded ghs  | Perfect |
| ILMN_2232936 | ENSG00000173660                                             | <i>UQCRH</i>     | expanded ghs  | Perfect |
| ILMN_1739454 | ENSG00000115464                                             | <i>USP34</i>     | expanded ghs  | Perfect |
| ILMN_1773505 | ENSG00000114316                                             | <i>USP4</i>      | expanded both | Perfect |
| ILMN_1809467 | ENSG00000168899                                             | <i>VAMP5</i>     | expanded ghs  | Perfect |
| ILMN_1692546 | ENSG00000112303                                             | <i>VNN2</i>      | expanded ghs  | Perfect |
| ILMN_1758864 | ENSG00000112303                                             | <i>VNN2</i>      | expanded ghs  | Perfect |
| ILMN_2181089 | ENSG00000145041                                             | <i>VPRBP</i>     | expanded ghs  | Perfect |
| ILMN_1809582 | ENSG00000129003                                             | <i>VPS13C</i>    | expanded both | Perfect |
| ILMN_2280911 | ENSG00000006715                                             | <i>VPS41</i>     | expanded both | Perfect |
| ILMN_1683243 | ENSG00000136631                                             | <i>VPS45</i>     | expanded ghs  | Perfect |
| ILMN_1727271 | ENSG00000140105                                             | <i>WARS</i>      | expanded ghs  | Perfect |
| ILMN_1716086 | ENSG00000136709                                             | <i>WDR33</i>     | expanded ghs  | Perfect |
| ILMN_1741869 | ENSG00000085433                                             | <i>WDR47</i>     | expanded ghs  | Perfect |
| ILMN_1799814 | ENSG00000060688                                             | <i>SNRNP40</i>   | expanded ghs  | Perfect |
| ILMN_1747759 | ENSG00000109046                                             | <i>WSB1</i>      | expanded ghs  | Perfect |
| ILMN_1742618 | ENSG00000132530                                             | <i>XAF1</i>      | expanded both | Perfect |
| ILMN_2174884 | ENSG00000130227                                             | <i>XPO7</i>      | expanded both | Good    |
| ILMN_2188374 | ENSG00000184575                                             | <i>XPOT</i>      | expanded both | Perfect |
| ILMN_1677098 | ENSG00000175155                                             | <i>YPEL2</i>     | expanded ghs  | Perfect |
| ILMN_1765994 | NA                                                          | NA               | expanded both | Bad     |
| ILMN_1655206 | ENSG00000177125                                             | <i>ZBTB34</i>    | expanded ghs  | Perfect |
| ILMN_1795905 | ENSG00000174282                                             | <i>ZBTB4</i>     | expanded ghs  | Perfect |
| ILMN_1693227 | ENSG00000122299                                             | <i>ZC3H7A</i>    | expanded ghs  | Perfect |
| ILMN_1729973 | ENSG00000105939                                             | <i>ZC3HAV1</i>   | expanded both | Bad     |
| ILMN_1724837 | ENSG00000105939                                             | <i>ZC3HAV1</i>   | expanded both | Perfect |
| ILMN_1684663 | ENSG00000177054                                             | <i>ZDHHC13</i>   | expanded ghs  | Perfect |
| ILMN_1785831 | ENSG00000177054                                             | <i>ZDHHC13</i>   | expanded ghs  | Perfect |
| ILMN_1741288 | ENSG00000196646                                             | <i>ZNF136</i>    | expanded ghs  | Perfect |
| ILMN_1669516 | ENSG00000137185                                             | <i>ZNF193</i>    | expanded ghs  | Perfect |

|              |                  |                |              |         |
|--------------|------------------|----------------|--------------|---------|
| ILMN_2376833 | ENSG00000010539  | <i>ZNF200</i>  | expanded ghs | Perfect |
| ILMN_1661293 | ENSG000000186019 | <i>ZNF224</i>  | expanded ghs | Perfect |
| ILMN_1710873 | ENSG000000109445 | <i>ZNF330</i>  | expanded ghs | Perfect |
| ILMN_1773247 | ENSG000000119725 | <i>ZNF410</i>  | expanded ghs | Perfect |
| ILMN_1764415 | ENSG000000196967 | <i>ZNF585A</i> | expanded ghs | Perfect |
| ILMN_1654819 | ENSG000000164048 | <i>ZNF589</i>  | expanded ghs | Perfect |
| ILMN_1764854 | ENSG000000160336 | <i>ZNF761</i>  | expanded ghs | Perfect |
| ILMN_1750044 | ENSG000000108278 | <i>ZNHIT3</i>  | expanded ghs | Perfect |

---

**Supplementary Table 6:** Gene ontology enrichment of the human iDIN. *P*-values have been computed using the standard hypergeometric test using all genes on the Illumina human ht12 chip annotated in David (<http://david.abcc.ncifcrf.gov/>). Term refers to the Gene Ontology term id or terms defined in the David data base. Fold enrichment is the observed count (given in the table) of genes from this GO term in the iDIN divided by the expected counts.

| Term                                                | Count | Fold Enrichment | <i>P</i> -value | Benjamini FDR |
|-----------------------------------------------------|-------|-----------------|-----------------|---------------|
| GO:0009615~response to virus                        | 22    | 9.16            | 1.88E-013       | 9.89E-10      |
| GO:0003723~RNA binding                              | 54    | 1.74            | 5.95E-011       | 1.71E-07      |
| GO:0006955~immune response                          | 60    | 2.33            | 1.28E-009       | 3.37E-06      |
| GO:0051707~response to other organism               | 24    | 1.25            | 6.28E-009       | 1.10E-05      |
| GO:0005515~protein binding                          | 250   | 1.21            | 6.71E-009       | 9.66E-06      |
| GO:0009607~response to biotic stimulus              | 30    | 1.26            | 9.01E-009       | 1.18E-05      |
| alternative splicing                                | 202   | 1.30            | 2.17E-008       | 2.32E-05      |
| antiviral defense                                   | 11    | 1.30            | 7.62E-008       | 4.06E-05      |
| GO:0002376~immune system process                    | 64    | 2.42            | 1.09E-007       | 1.14E-04      |
| GO:0044428~nuclear part                             | 59    | 4.32            | 1.13E-007       | 2.45E-05      |
| GO:0032991~macromolecular complex                   | 110   | 2.32            | 4.04E-007       | 7.01E-05      |
| Direct protein sequencing                           | 106   | 4.18            | 4.22E-007       | 1.50E-04      |
| GO:0044446~intracellular organelle part             | 136   | 5.95            | 9.82E-007       | 1.42E-04      |
| GO:0044422~organelle part                           | 136   | 1.92            | 1.18E-006       | 1.46E-04      |
| GO:0043231~intracellular membrane-bound organelle   | 240   | 1.95            | 1.24E-006       | 1.35E-04      |
| GO:0043227~membrane-bound organelle                 | 240   | 36.66           | 1.29E-006       | 1.25E-04      |
| ribosome                                            | 12    | 1.95            | 1.44E-006       | 3.84E-04      |
| rna-binding                                         | 32    | 22.00           | 2.68E-006       | 5.72E-04      |
| GO:0006952~defense response                         | 37    | 3.71            | 3.25E-006       | 2.85E-03      |
| protein biosynthesis                                | 19    | 2.11            | 3.51E-006       | 6.24E-04      |
| acetylation                                         | 37    | 1.52            | 3.64E-006       | 5.53E-04      |
| GO:0031974~membrane-enclosed lumen                  | 50    | 2.37            | 3.87E-006       | 3.36E-04      |
| GO:0043233~organelle lumen                          | 50    | 1.69            | 3.87E-006       | 3.36E-04      |
| GO:0044260~cellular macromolecule metabolic process | 137   | 3.74            | 4.02E-006       | 3.01E-03      |
| GO:0005829~cytosol                                  | 34    | 5.43            | 4.19E-006       | 3.03E-04      |
| GO:0043229~intracellular organelle                  | 266   | 24.44           | 4.82E-006       | 3.22E-04      |
| GO:0005830~cytosolic ribosome (sensu Eukaryota)     | 12    | 2.68            | 4.92E-006       | 3.05E-04      |
| GO:0043226~organelle                                | 266   | 2.33            | 5.06E-006       | 2.92E-04      |
| cytoplasm                                           | 101   | 3.71            | 5.86E-006       | 7.80E-04      |
| GO:0019538~protein metabolic process                | 141   | 2.96            | 5.96E-006       | 3.91E-03      |
| phosphoprotein                                      | 167   | 1.87            | 6.86E-006       | 8.12E-04      |
| GO:0044445~cytosolic part                           | 16    | 1.58            | 7.31E-006       | 3.97E-04      |
| GO:0051704~multi-organism process                   | 25    | 1.85            | 7.65E-006       | 4.45E-03      |
| GO:0031981~nuclear lumen                            | 39    | 7.85            | 8.08E-006       | 4.13E-04      |

|                                                                |     |       |           |          |
|----------------------------------------------------------------|-----|-------|-----------|----------|
| GO:0044267~cellular protein metabolic process                  | 134 | 19.35 | 8.18E-006 | 4.29E-03 |
| GO:0043234~protein complex ribosomal protein                   | 88  | 15.48 | 1.60E-005 | 7.70E-04 |
| GO:0005488~binding                                             | 18  | 1.25  | 4.66E-005 | 4.96E-03 |
| GO:0005488~binding                                             | 377 | 1.87  | 6.29E-005 | 5.85E-02 |
| GO:0044444~cytoplasmic part                                    | 134 | 3.95  | 6.61E-005 | 3.01E-03 |
| IPR006117:2-5-oligoadenylate synthetase                        | 4   | 3.73  | 6.68E-005 | 3.26E-01 |
| GO:0003824~catalytic activity                                  | 197 | 4.87  | 7.05E-005 | 4.95E-02 |
| GO:0000502~proteasome complex (sensu Eukaryota)                | 9   | 32.82 | 9.42E-005 | 4.08E-03 |
| GO:0033279~ribosomal subunit                                   | 14  | 2.21  | 9.85E-005 | 4.06E-03 |
| GO:0033036~macromolecule localization                          | 43  | 1.35  | 1.04E-004 | 4.83E-02 |
| GO:0044464~cell part                                           | 415 | 6.63  | 1.06E-004 | 4.17E-03 |
| GO:0005623~cell protein transport                              | 415 | 5.37  | 1.08E-004 | 4.07E-03 |
| IPR006116:2-5 oligoadenylate synthetase, ubiquitin-like region | 26  | 1.58  | 1.17E-004 | 1.13E-02 |
| IPR006116:2-5 oligoadenylate synthetase, ubiquitin-like region | 4   | 6.74  | 1.64E-004 | 3.84E-01 |
| GO:0009058~biosynthetic process                                | 66  | 3.20  | 1.95E-004 | 8.17E-02 |
| GO:0006954~inflammatory response                               | 21  | 1.84  | 2.28E-004 | 8.79E-02 |
| proteasome                                                     | 9   | 1.19  | 2.32E-004 | 2.04E-02 |
| GO:0008104~protein localization                                | 40  | 1.26  | 2.39E-004 | 8.59E-02 |
| PIRSF005680:interferon-induced 56K protein                     | 4   | 5.93  | 2.79E-004 | 5.80E-01 |
| PIRSF005552:guanine nucleotide-binding protein 1               | 4   | 3.52  | 2.79E-004 | 5.80E-01 |
| GO:0045184~establishment of protein localization               | 38  | 19.31 | 3.06E-004 | 1.02E-01 |
| GO:0009059~macromolecule biosynthetic process                  | 44  | 2.44  | 3.19E-004 | 9.94E-02 |
| GO:0005654~nucleoplasm splice variant                          | 28  | 1.58  | 3.58E-004 | 1.29E-02 |
| GO:0017111~nucleoside-triphosphatase activity                  | 149 | 6.60  | 3.59E-004 | 9.99E-01 |
| GO:0017111~nucleoside-triphosphatase activity                  | 33  | 4.26  | 3.68E-004 | 1.91E-01 |
| GO:0015031~protein transport                                   | 36  | 24.44 | 3.69E-004 | 1.08E-01 |
| GO:0044238~primary metabolic process                           | 260 | 1.77  | 5.02E-004 | 1.36E-01 |
| GO:0006412~translation                                         | 33  | 8.46  | 5.22E-004 | 1.34E-01 |
| GO:0005842~cytosolic large ribosomal subunit (sensu Eukaryota) | 7   | 3.21  | 5.25E-004 | 1.81E-02 |
| GO:0051607~defense response to virus                           | 5   | 19.35 | 5.81E-004 | 1.42E-01 |
| GO:0043170~macromolecule metabolic process                     | 230 | 1.77  | 7.14E-004 | 1.64E-01 |
| GO:0044249~cellular biosynthetic process                       | 51  | 1.94  | 7.34E-004 | 1.61E-01 |
| GO:0016462~pyrophosphatase activity                            | 33  | 4.50  | 7.41E-004 | 2.99E-01 |
| GO:0006886~intracellular protein transport                     | 24  | 1.38  | 7.41E-004 | 1.56E-01 |
| GO:0044237~cellular metabolic process                          | 258 | 1.18  | 8.26E-004 | 1.65E-01 |
| hsa03010:Ribosome                                              | 12  | 1.41  | 8.31E-004 | 1.54E-01 |

|                                                                                                      |    |      |           |          |
|------------------------------------------------------------------------------------------------------|----|------|-----------|----------|
| GO:0016818~hydrolase activity, acting on acid anhydrides, in phosphorus-containing anhydrides        | 33 | 1.43 | 8.39E-004 | 2.92E-01 |
| GO:0016814~hydrolase activity, acting on carbon-nitrogen (but not peptide) bonds, in cyclic amidines | 6  | 2.19 | 8.65E-004 | 2.67E-01 |
| IPR003191:Guanylate-binding protein, C-terminal                                                      | 4  | 3.75 | 8.65E-004 | 8.19E-01 |

**Supplementary Table 7:** Overview of the region of interest on human chromosome 13. The region is defined by synteny to the rat chromosome 15 locus (Supplementary Figure 4). The boundaries for the region are determined by the human orthologous genes of the rat genes flanking the region. Gene annotation was obtained from Ensembl release 51. SNP ids refer to dbSNP significantly associated with *EBI2* expression in either GHS or Cardiogenics cohorts. The cohort where *Ebi2* eQTL in monocytes was identified is indicated (GHS, Gutenberg Heart Study; Card, Cardiogenics Study).

| Ensembl Gene ID | HGNC symbol   | SNP id    | Chromosome Name | Gene Start (bp) | Gene End (bp) | Biotype           | Comment                   | Cohort   |
|-----------------|---------------|-----------|-----------------|-----------------|---------------|-------------------|---------------------------|----------|
| ENSG0000088387  | <i>DOCK9</i>  |           | 13              | 98243742        | 98536661      | protein_coding    |                           |          |
| ENSG00000207298 |               |           | 13              | 98475489        | 98475600      | snRNA             |                           |          |
| ENSG00000210366 |               |           | 13              | 98611288        | 98611438      | scRNA_pseudogene  |                           |          |
| ENSG00000210371 |               |           | 13              | 98611797        | 98611920      | scRNA_pseudogene  |                           |          |
| ENSG00000134882 | <i>UBAC2</i>  |           | 13              | 98651109        | 98836682      | protein_coding    |                           |          |
| ENSG00000201793 |               |           | 13              | 98655963        | 98656302      | misc_RNA          |                           |          |
| ENSG00000125245 | <i>GPR18</i>  |           | 13              | 98704973        | 98711999      | protein_coding    |                           |          |
| ENSG00000169508 | <i>EBI2</i>   |           | 13              | 98744791        | 98757695      | protein_coding    |                           |          |
| ENSG00000207719 |               |           | 13              | 98806386        | 98806483      | miRNA             |                           |          |
|                 |               | rs9557217 | 13              | 98866518        | 98866518      | SNP               | <i>EBI2</i> eQTL          | Card     |
|                 |               | rs9585056 | 13              | 98879767        | 98879767      | SNP               | T1D SNP, <i>EBI2</i> eQTL | GHS/Card |
|                 |               | rs9517723 | 13              | 98882680        | 98882680      | SNP               | <i>EBI2</i> eQTL          | GHS      |
|                 |               | rs9517725 | 13              | 98883134        | 98883134      | SNP               | Imputed <i>EBI2</i> eQTL  | GHS/Card |
|                 |               | rs7325697 | 13              | 98915794        | 98915794      | SNP               | <i>EBI2</i> eQTL          | GHS      |
| ENSG00000125304 | <i>TM9SF2</i> |           | 13              | 98951672        | 99013635      | protein_coding    |                           |          |
| ENSG00000212197 |               |           | 13              | 98986576        | 98986651      | misc_RNA          |                           |          |
| ENSG00000125246 | <i>CLYBL</i>  |           | 13              | 99056924        | 99359714      | protein_coding    |                           |          |
| ENSG00000201245 |               |           | 13              | 99234112        | 99234238      | snoRNA            |                           |          |
| ENSG00000210404 |               |           | 13              | 99234310        | 99234412      | snoRNA_pseudogene |                           |          |

**Supplementary Table 8:** Association of iDIN genes with T1D. We considered the intersection (human and rat,  $n = 51$ ) and the union (human or rat,  $n = 697$ , which comprises 496 human Ensembl genes from Supplementary Table 5 and 201 rat genes from Supplementary Table 2 that have orthologous human Ensembl genes) of the human and rat immune response network or their orthologous genes for the enrichment analysis. Ensembl genes were mapped to all SNPs in a 1 Mb region for the analysis. Since the HLA region is known to be highly associated to T1D, we also analyzed the sets without genes in the region in order to assess the impact of the HLA region on the gene set enrichment for T1D. Since many immune and viral response genes have been associated to T1D previously, we tested our sets against different backgrounds: the whole genome and genes annotated to the GO term “immune response”. Here we report the value of the Z statistic and the one-sided  $P$ -value (see Supplementary Information).

| iDIN genes  | background      | rat and human |                       | rat or human |                        |
|-------------|-----------------|---------------|-----------------------|--------------|------------------------|
|             |                 | Z             | $P$ -value            | Z            | $P$ -value             |
| with HLA    | whole genome    | 2.45          | $7.05 \times 10^{-3}$ | 6.23         | $2.40 \times 10^{-10}$ |
| without HLA |                 | 2.88          | $2.01 \times 10^{-3}$ | 5.03         | $2.41 \times 10^{-7}$  |
| with HLA    | immune response | -2.46         | $9.93 \times 10^{-1}$ | 4.29         | $8.85 \times 10^{-6}$  |
| without HLA |                 | -0.44         | $6.71 \times 10^{-1}$ | 3.14         | $8.57 \times 10^{-4}$  |

**Supplementary Table 9:** T1D association results. Association testing of rs9585056 T>C using observed genotypes in a subset of the T1D GWA samples, additional case control samples and family samples. N is the number of cases/controls, or number of informative transmissions. Fq is the frequency of the minor allele in controls or parents.

| <b>Cohort</b>               | <b>N</b>    | <b>Fq (C)</b> | <b>Odds ratio (C:T)</b> | <b>(95% CI)</b> | <b>P-value</b>           |
|-----------------------------|-------------|---------------|-------------------------|-----------------|--------------------------|
| GWAS                        | 5678/5268   | 0.248         | 1.18                    | (1.11-1.25)     | 1.60 x 10 <sup>-07</sup> |
| Additional                  | 2708/4816   | 0.253         | 1.11                    | (1.03-1.20)     | 0.00862                  |
| Families                    | 3038        | 0.260         | 1.09                    | (1.01-1.17)     | 0.022                    |
| Case-control<br>combined    | 8386/10084  | 0.25          | 1.15                    | (1.1-1.21)      | 5.20 x 10 <sup>-09</sup> |
| Families & case-<br>control | (see above) | -             | -                       | -               | 7.05 x 10 <sup>-10</sup> |



**Supplementary Table 10:** Oligonucleotide primers and probes used for quantitative ChIP-PCR.

| <b>Gene</b>     | <b>Forward primer (5'-3')</b> | <b>Reverse primer (5'-3')</b> | <b>Taqman Probe (5'-3')</b>   |
|-----------------|-------------------------------|-------------------------------|-------------------------------|
| <i>Irf7</i>     | CCAGGCGAGTGAAACGAAA           | GCGCTGTTGAGCTGTTTGG           | TGCGTCTCGGGAAAATGAAACCTAAACTG |
| <i>Irf271</i>   | GCTGTCTTCAGTCACGAGGTGTA       | AGATAGGTTTTGGTGTCCCAGTTC      | CTTCACCCAGAGTGGACTTCTAAGGCCTG |
| <i>Lgals3bp</i> | GCAGCTCGAAGCTTCTGTAGAC        | GGAAGAGGCTGAGGAAAACCA         | TCAGCTGAGAAAGGCCCCACCA        |
| <i>Oas1</i>     | GGCCTGGATAATTTGCATATCC        | TGGTTGAACTTGAACAAGATTTTC      | CGCCCCTCTCGGAAATGGAAA         |
| <i>Sp110</i>    | TGCCCGGAGTGGAGTGA             | CCCCCTTCCGTGTTTCC             | AGGCAGGGAGGCTAAGGACCAGCA      |
